# Supplementary material for: Neighbourhood socioeconomic status modifies the association between anxiety and depression during pregnancy and preterm birth: a Community-based Canadian cohort study
Source: PubMed Central journal article supplement — BMJ Open. 2020 Feb 10;10(2):e031035. doi: 10.1136/bmjopen-2019-031035 (PMC7045250; doi:10.1136/bmjopen-2019-031035), 2020-02-10
Supplement: bmjopen-2019-031035.draft_revisions.pdf [file bmjopen-2019-031035.draft_revisions.pdf]

# BMJ Open

BMJ Open is committed to open peer review. As part of this commitment we make the peer review history of every article we publish publicly available.

When an article is published we post the peer reviewers' comments and the authors' responses online. We also post the versions of the paper that were used during peer review. These are the versions that the peer review comments apply to.

The versions of the paper that follow are the versions that were submitted during the peer review process. They are not the versions of record or the final published versions. They should not be cited or distributed as the published version of this manuscript.

BMJ Open is an open access journal and the full, final, typeset and author-corrected version of record of the manuscript is available on our site with no access controls, subscription charges or pay-per-view fees (<http://bmjopen.bmj.com>).

If you have any questions on BMJ Open's open peer review process please email [info.bmjopen@bmj.com](mailto:info.bmjopen@bmj.com)

# BMJ Open

## Neighborhood socioeconomic status modifies the association between anxiety and depression during pregnancy and preterm birth: A Community-based Canadian Cohort Study

|                               |                                                                                                                                                                                                                                                                                                                                                                                                                                                                           |
|-------------------------------|---------------------------------------------------------------------------------------------------------------------------------------------------------------------------------------------------------------------------------------------------------------------------------------------------------------------------------------------------------------------------------------------------------------------------------------------------------------------------|
| Journal:                      | <i>BMJ Open</i>                                                                                                                                                                                                                                                                                                                                                                                                                                                           |
| Manuscript ID                 | bmjopen-2019-031035                                                                                                                                                                                                                                                                                                                                                                                                                                                       |
| Article Type:                 | Research                                                                                                                                                                                                                                                                                                                                                                                                                                                                  |
| Date Submitted by the Author: | 12-Apr-2019                                                                                                                                                                                                                                                                                                                                                                                                                                                               |
| Complete List of Authors:     | Adhikari, Kamala; University of Calgary Cumming School of Medicine<br>Patten, Scott<br>Williamson, Tyler; University of Calgary Cumming School of Medicine, Community Health Sciences<br>Patel, Alka<br>Premji, Shahirose ; York University,<br>Tough, Suzanne ; University of Calgary Cumming School of Medicine, Paediatrics and Community Health Science<br>Letourneau, Nicole<br>Giesbrecht, Gerald<br>Metcalf, Amy; University of Calgary, Obstetrics and Gynecology |
| Keywords:                     | MENTAL HEALTH, EPIDEMIOLOGY, Preterm birth, Neighbourhood socioeconomic status                                                                                                                                                                                                                                                                                                                                                                                            |
|                               |                                                                                                                                                                                                                                                                                                                                                                                                                                                                           |

SCHOLARONE™  
Manuscripts

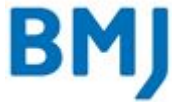

I, the Submitting Author has the right to grant and does grant on behalf of all authors of the Work (as defined in the below author licence), an exclusive licence and/or a non-exclusive licence for contributions from authors who are: i) UK Crown employees; ii) where BMJ has agreed a CC-BY licence shall apply, and/or iii) in accordance with the terms applicable for US Federal Government officers or employees acting as part of their official duties; on a worldwide, perpetual, irrevocable, royalty-free basis to BMJ Publishing Group Ltd ("BMJ") its licensees and where the relevant Journal is co-owned by BMJ to the co-owners of the Journal, to publish the Work in this journal and any other BMJ products and to exploit all rights, as set out in our [licence](#).

The Submitting Author accepts and understands that any supply made under these terms is made by BMJ to the Submitting Author unless you are acting as an employee on behalf of your employer or a postgraduate student of an affiliated institution which is paying any applicable article publishing charge ("APC") for Open Access articles. Where the Submitting Author wishes to make the Work available on an Open Access basis (and intends to pay the relevant APC), the terms of reuse of such Open Access shall be governed by a Creative Commons licence – details of these licences and which [Creative Commons](#) licence will apply to this Work are set out in our licence referred to above.

Other than as permitted in any relevant BMJ Author's Self Archiving Policies, I confirm this Work has not been accepted for publication elsewhere, is not being considered for publication elsewhere and does not duplicate material already published. I confirm all authors consent to publication of this Work and authorise the granting of this licence.

1  
2  
3  
4 **Neighborhood socioeconomic status modifies the association between anxiety and**  
5  
6 **depression during pregnancy and preterm birth: A Community-based Canadian Cohort**  
7  
8 **Study**  
9

10  
11  
12  
13 Kamala Adhikari<sup>1</sup>, Scott B Patten<sup>1</sup>, Tyler Williamson<sup>1</sup>, Alka B Patel<sup>1,2</sup>, Shahirose Premji<sup>3</sup>,  
14  
15 Suzanne Tough<sup>1,4</sup>, Nicole Letourneau<sup>1,4,5,8</sup>, Gerald Giesbrecht<sup>1,4</sup>, Amy Metcalfe<sup>1,6,7</sup>  
16  
17

18  
19  
20 <sup>1</sup>Department of Community Health Sciences, University of Calgary, Calgary, Canada; <sup>2</sup>Applied  
21  
22 Research and Evaluation- Primary Health Care, Alberta Health Services, Calgary,  
23  
24 Canada; <sup>3</sup>School of Nursing, Faculty of Health, York University, Calgary, Canada; <sup>4</sup>Department  
25  
26 of Pediatrics, University of Calgary, Calgary, Canada; <sup>5</sup>Faculty of Nursing University of  
27  
28 Calgary, Calgary, Canada; <sup>6</sup>Department of Obstetrics and Gynecology, University of Calgary,  
29  
30 Calgary, Canada; <sup>7</sup>Department of Medicine, University of Calgary, Calgary, Canada; <sup>8</sup>Department  
31  
32 of Psychiatry, University of Calgary, Calgary, Canada  
33  
34  
35  
36  
37  
38

39 **Corresponding author:**

40  
41 Kamala Adhikari

42  
43 Department of Community Health Sciences, University of Calgary

44  
45 3280 Hospital Drive NW, Calgary, AB, T2N 4Z6

46  
47 Email: [kamala.adhikaridahal@ucalgary.ca](mailto:kamala.adhikaridahal@ucalgary.ca)

48  
49 Telephone number: 1+5870-700-7531

50  
51  
52 ORCID number: 0000-0003-2872-9496  
53  
54  
55  
56  
57  
58  
59  
60

1  
2  
3  
4  
5  
6  
7  
8  
9  
10  
11  
12  
13  
14  
15  
16  
17  
18  
19  
20  
21  
22  
23  
24  
25  
26  
27  
28  
29  
30  
31  
32  
33  
34  
35  
36  
37  
38  
39  
40  
41  
42  
43  
44  
45  
46  
47  
48  
49  
50  
51  
52  
53  
54  
55  
56  
57  
58  
59  
60

**Word Count: 3000**

For peer review only

## Abstract

### Background

The association between anxiety and depression during pregnancy and preterm birth (PTB) is incompletely understood. This study examined the association of anxiety alone, depression alone, and the presence of both anxiety and depression with PTB and further examined whether neighborhood socioeconomic status (SES) modified this association.

### Methods

Individual data from two pregnancy cohort studies in Alberta, Canada (n=5,538) were linked to neighborhood SES data from Canada census. Depression was defined as an Edinburgh Postnatal Depression Scale (EPDS) score of  $\geq 13$ , anxiety was defined as an EPDS-anxiety subscale score of  $\geq 6$ , and the presence of both anxiety and depression was defined as meeting both anxiety and depression definitions. Logistic regression models were developed including confounding variables (parity, ethnicity, and body mass index) and the interaction-term of neighborhood deprivation and anxiety and/or depression.

### Results

Overall, 7.3% of women delivered preterm infants. The presence of both anxiety and depression, but neither of these conditions alone, was significantly associated with PTB (OR=1.6, 95% CI=1.1, 2.3) and had significant interaction with neighborhood deprivation (p-value=0.014). The predicted probability of PTB for women with both anxiety and depression was 10.0%, which increased to 15.7% if they lived in the most deprived neighborhoods and decreased to 1.4% if they lived in the least deprived neighborhoods.

## Conclusions

Effects of anxiety and depression on risk of PTB differ depending on where women live.

This understanding may guide the identification of women at increased risk for PTB and allocation of resources for early identification and management of anxiety and depression.

**Keywords:** anxiety and depression, neighborhood socioeconomic status, deprivation, preterm birth

For peer review only

### Article summary: strengths and limitations of this study

- This study provides detail description about the relationship between anxiety and depression during pregnancy and preterm birth as it analyzed the presence of both depressive and anxious symptoms versus isolated depressive or anxious symptoms as risk factors of preterm birth, and it further examined whether neighborhood socioeconomic status modifies the relationship between these risk factors and preterm birth.
- This study used data from two community-based prospective pregnancy cohort studies. This provided an opportunity to analyze preterm birth across the several strata of anxiety, depression, and both anxiety and depression and neighborhood socioeconomic status in a relatively representative sample (compared to a hospital-based or clinic-based sample) of pregnant women.
- The study sample over-represents women from urban areas of Alberta, with high socioeconomic status, thus limiting the generalizability of the findings to urban settings.
- The use of self-reported anxiety and depression measurement scales may introduce measurement inaccuracy.



## BACKGROUND

Worldwide, a total of 15 million births occur preterm (i.e., before 37 weeks of gestation), with a global average rate of 11.1%.<sup>(1)</sup> Preterm birth (PTB) is responsible for 35% of neonatal deaths globally.<sup>(2)</sup> Among survivors, it is also a significant risk factor for short and long-term morbidities, such as respiratory distress syndrome, cerebral palsy, and learning difficulties.<sup>(3-5)</sup> Despite substantial research and interventions to prevent PTB, the incidence of PTB has not declined and its etiology remains unclear.<sup>(1, 6)</sup> Understanding the risk factors for PTB, such as psychosocial distress and neighborhood low socioeconomic status (SES), may help identify women at increased risk, and assist in the allocation of resources, ultimately reducing the incidence of PTB.

PTB has been linked to psychosocial distress during pregnancy, specifically anxiety and depression – the most common mental health problems during pregnancy.<sup>(7-10)</sup> However, the association between anxiety and depression during pregnancy and PTB is incompletely understood. Many previous studies on the association between anxiety and depression and PTB were conducted in medical settings (i.e. hospital and clinic) with small samples and high rates of attrition.<sup>(7, 9, 10)</sup> Notably, most of the previous studies analyzed anxiety or depression without considering that they may occur in a comorbid state.<sup>(7-11)</sup> Comorbid anxiety and depression is, in fact, common (affecting up to 50% of women with anxiety or depression) and is more likely to involve severe symptoms of anxiety and depression than isolated anxiety or depression.<sup>(12-14)</sup> Thus, comorbid anxiety and depression may pose a higher risk of PTB than isolated anxiety or depression, which may influence the association between anxiety or depression and PTB.

Anxiety and depression are negatively correlated with neighborhood SES.<sup>(15)</sup> Neighborhood SES is an area-level measure of SES, which aggregates individual SES (such as

1  
2  
3 income, education, and employment status) at a certain geographical level.(16) Neighborhood  
4  
5 SES may influence the risk of PTB by exposing women to health benefitting or risk elevating  
6  
7 factors.(16-19) Low neighborhood SES may affect an individual's ability to fulfill daily needs,  
8  
9 access resources, make lifestyle choices, and cope with different situations.(16-19) Thus, the risk  
10  
11 of PTB that is associated with anxiety and/or depression during pregnancy may differ by  
12  
13 neighborhood SES. To our knowledge, this has not been examined.  
14  
15

16  
17 This study examined the association of the presence of anxiety symptoms alone,  
18  
19 depression symptoms alone, and both anxiety and depression symptoms with PTB. This study  
20  
21 further examined whether the presence of anxiety, depression, and both anxiety and depression  
22  
23 interact with neighborhood SES to increase the risk of PTB. This may help to determine the  
24  
25 subgroups of women who are at increased risk for PTB.  
26  
27  
28  
29

## 30 31 **METHODS**

### 32 33 **Data sources**

34  
35 This study combined datasets from two community-based prospective pregnancy cohort  
36  
37 studies in Alberta, Canada (n=5,528). The All Our Families (AOF) cohort study recruited 3,341  
38  
39 pregnant women and the Alberta Pregnancy Outcomes and Nutrition (APrON) cohort study  
40  
41 recruited 2,187 pregnant women, with 231 women participating in both studies. Both studies  
42  
43 collected data on socio-demographics, lifestyle, social support, anxiety, depression, and PTB.  
44  
45 (20) The description and comparability of these two cohort studies is available elsewhere,(20,  
46  
47 21) and justifies combining these data sources.(22) Briefly, each cohort study had similar  
48  
49 recruitment periods (2008-2012), inclusion criteria, sampling design, and data-collection  
50  
51 methods.(25, 26) We obtained two de-identified cohort datasets linked with neighborhood SES  
52  
53  
54  
55  
56  
57  
58  
59  
60

1  
2  
3 data from SAGE (Secondary Analysis to Generate Evidence), the secure data repository  
4  
5 developed by PolicyWise for Children & Families, which houses these datasets. Ethics approval  
6  
7 for this study was obtained from the Conjoint Health Research Ethics Board at the University of  
8  
9  
10 Calgary.

### 11 12 **Patient and public involvement**

13  
14 This study used de-identified secondary data. Patient and public were not involved in this  
15  
16 study.  
17

### 18 19 **Variables**

20  
21 Variables that were deemed similar in the two studies were harmonized and appended  
22  
23 into a single new dataset. Women who participated in both studies (n=231) were counted only  
24  
25 once. Both cohorts used an identical measure of depression, i.e., the Edinburgh Depression Scale  
26  
27 (EPDS). The EDS is a 10-item self-reported scale with each item ranging from 0 to 3 to assess  
28  
29 symptoms of current depression (i.e. how women have felt in the past 7 days).(23) The EDS has  
30  
31 high internal consistency of 0.87,(23) a sensitivity of 78%, and specificity of 99% in the obstetric  
32  
33 population,(24, 25) and is the most common scale used to measure antenatal and postnatal  
34  
35 depression.(26) The recommended standard cut-off score of  $\geq 13$  out of 30 points on the EPDS  
36  
37 was used to define the presence of clinically significant depression during pregnancy.(27) While  
38  
39 the EPDS was specifically designed to assess depression, three items (namely items 3, 4, and 5)  
40  
41 comprising the anxiety subscale (EDPS-3A) have been suggested as a measure of anxiety.(28,  
42  
43 29) with a sensitivity of 66.7% and specificity of 88.2% in the obstetric population.(29)The  
44  
45 standard cut-off of  $\geq 6$  out of a maximum of 9 is used to define the presence of clinically  
46  
47 significant anxiety during pregnancy.(29) The cohort studies used different measures of anxiety:  
48  
49 the AOF study used the State-Trait Anxiety Inventory and the APrON study used the Symptoms  
50  
51  
52  
53  
54  
55  
56  
57  
58  
59  
60

1  
2  
3 Checklist 90. Thus, the EDPS-3A was chosen as a measure of anxiety to have a consistent  
4  
5 measure across studies and to avoid the introduction of misclassification bias related to the use of  
6  
7 different tools. Presence of both anxiety and depression was defined as meeting both anxiety and  
8  
9 depression definitions at the same time point in pregnancy. The birth that occurred before the 37  
10  
11 weeks of gestation was defined as PTB (both spontaneous and iatrogenic included).  
12  
13

14  
15 Neighborhood SES data were measured by the Pampalon material deprivation index  
16  
17 (derived from the 2011 Statistics Canada census).(30, 31) which was aggregated at the  
18  
19 dissemination area (DA) level. DA is the smallest geographical unit available in the Canadian  
20  
21 census, consisting of 400-700 persons.(32) The Pampalon material deprivation index is a  
22  
23 composite measure of neighborhood SES that combines the proportion of persons without high  
24  
25 school diplomas, the average personal income, and the rate of unemployment within the DA. It is  
26  
27 used as a quintile, with quintile 1 representing the least deprived and quintile 5 representing the  
28  
29 most deprived neighborhoods.(30)  
30  
31

### 32 33 **Data Analysis**

34  
35 First, variables significantly associated with PTB as well as anxiety and depression were  
36  
37 identified using bivariate analysis ( $p < 0.05$ ). Then, a multivariable logistic regression model for  
38  
39 the association between anxiety and/or depression (“anxiety only,” “depression only,” and “both  
40  
41 anxiety and depression”) and PTB was constructed. The model included variables identified in  
42  
43 the bivariate analysis (parity, ethnicity, and body mass index), other variables (smoking, social  
44  
45 support, and maternal SES: these variables were selected based on literature, considering that  
46  
47 they may influence the association in the multivariable model), and interaction terms. The  
48  
49 interaction terms comprised “anxiety only,” “depression only,” and “both anxiety and  
50  
51 depression” combined with each quintile of deprivation indices. Quintile 4 and 5 were combined  
52  
53  
54  
55  
56  
57  
58  
59  
60

1  
2  
3 as there were few or no cases in some strata. The presence of significant interactions was  
4 identified through the p-values associated with beta coefficients of each interaction term.  
5  
6

7  
8 Variables were dropped from the model using a stepwise backward variable elimination  
9 approach if they did not influence the association between anxiety and/or depression and PTB.  
10  
11 The interaction terms and variables (parity, ethnicity, and body mass index) were retained in the  
12 model as some of the interaction terms were significant and the variables influenced the  
13 association. This approach (limiting the variables in the model) adjusted for confounding and  
14 improved the precision of the estimates. Subsequently, we constructed another model without the  
15 interaction terms. A likelihood ratio test was used to compare the goodness of model fit between  
16 those two nested models – with and without the interaction terms. Adjusted prediction of PTB  
17 (i.e., predicted probability of PTB that was evaluated at the average value of covariates, parity,  
18 ethnicity, and body mass index, across observations) was estimated using the model with  
19 interaction terms. Missing data were deleted using variable-wise or pair-wise deletion approach  
20 for univariate or bivariate analysis and listwise deletion approach for regression models. Alpha  
21 ( $\alpha$ ) of <0.05 was used to determine statistical significance. All analyses were performed using  
22 STATA/IC 14.1.  
23  
24  
25  
26  
27  
28  
29  
30  
31  
32  
33  
34  
35  
36  
37  
38  
39  
40  
41

## 42 **RESULTS**

43  
44 Of total 5,297 pregnant women, the proportion of missing data ranged from 1.5% for  
45 depression to 7.5% for gestational age at delivery. Overall, 7.3% (95% CI=6.6, 8.1) of women  
46 delivered preterm infants. Women who delivered preterm infants were more likely to be non-  
47 white, obese, primiparous, and from the most deprived neighborhoods. As shown in Table 1,  
48  
49 17.9% of women had anxiety and/or depression: 7.7% (95% CI=7.0, 8.4) of women had both  
50  
51  
52  
53  
54  
55  
56  
57  
58  
59  
60

1  
2  
3 anxiety and depression, followed by 6.0% (95% CI=5.4, 6.6) women had anxiety alone, and  
4  
5 4.2% (95% CI=3.7, 4.8) women had depression alone. Women with both anxiety and depression  
6  
7 had a higher rate of PTB (10.6%, 95% CI=7.8, 14.3) compared to those with isolated anxiety  
8  
9 (6.5%, 95% CI=4.2, 10.0) or isolated depression (8.2%, 95% CI=5.1, 12.9) or without anxiety  
10  
11 and depression (6.9%, 95% CI=6.1, 7.7). A higher proportion of women with a presence of both  
12  
13 anxiety and depression (compared to those with anxiety or depression alone) were single, non-  
14  
15 white, recent immigrants, had a low household income, and were from the most deprived  
16  
17 neighborhoods ( $p<0.05$ ) (Table 1). Mean scores of anxiety ( $6.6\pm 0.4$ ) and depression ( $16.2\pm 0.13$ )  
18  
19 were higher among women with both conditions compared to those with anxiety alone ( $6.1\pm 0.2$ )  
20  
21 or depression alone ( $14.6\pm 0.12$ ).  
22  
23  
24  
25

26 The presence of both anxiety and depression (adjusted odds ratio (aOR)=1.6, 95%  
27  
28 CI=1.1, 2.3), but neither anxiety alone (aOR=0.9, 95% CI=0.5, 1.4) nor depression alone  
29  
30 (aOR=1.3, 95% CI=0.8, 2.2), was significantly associated with PTB (Table 2). Effect  
31  
32 modification was observed between the presence of both anxiety and depression and  
33  
34 neighborhood SES (specifically, neighborhood with deprivation quintile 4 and 5 combined,  $p$ -  
35  
36 value=0.014, and deprivation quintile 3,  $p$ -value=0.015). Compared to women without anxiety  
37  
38 and depression, women with both anxiety and depression who lived in quintile 3 and more  
39  
40 deprived neighborhoods had significantly increased odds of experiencing a preterm delivery  
41  
42 (quintile 4 and 5: aOR=2.3, 95% CI=1.3, 4.1). Whereas, compared to women without anxiety  
43  
44 and depression, women with both anxiety and depression who lived in the least deprived  
45  
46 neighborhood were not at elevated odds of experiencing a preterm delivery (aOR=0.2, 95 %  
47  
48 CI=0.01, 1.3) (Table 2).  
49  
50  
51  
52  
53  
54  
55  
56  
57  
58  
59  
60

1  
2  
3 As shown in Table 3, the predicted probability of PTB for women with a presence of both  
4 anxiety and depression was 10.0% (95% CI=6.8, 13.1). It increased to 15.7% (95% CI=9.5, 22.6)  
5  
6 if they lived in the most deprived neighborhoods – an increase of 57.1% – and it decreased to  
7  
8 1.4% (95% CI=0.04, 4.2) if they lived in the least deprived neighborhoods. The predicted  
9  
10 probability of PTB for women with depression alone was 9.6% (95% CI=5.2, 14.1), which  
11  
12 increased to 14.0% (95% CI=2.7, 25.3) if they lived in the most deprived neighborhoods. The  
13  
14 predicted probability for women with anxiety alone and women with absence of anxiety and  
15  
16 depression remained similar across the neighborhood deprivation indices.  
17  
18  
19  
20  
21  
22  
23

## 24 **DISCUSSION**

### 25 **Main findings**

26  
27 This study examined the association of anxiety alone, depression alone, and the presence  
28  
29 of both anxiety and depression during pregnancy with PTB, using data from two community-  
30  
31 based pregnancy cohort studies in Alberta, Canada. The study found an association between the  
32  
33 presence of both anxiety and depression and PTB, which significantly differed according to  
34  
35 neighborhood SES. Women with both anxiety and depression were more likely to deliver  
36  
37 preterm infants if they lived in a relatively more deprived neighborhood compared to if they  
38  
39 lived in a less deprived neighborhood. For women with both anxiety and depression, the absolute  
40  
41 predicted probability of delivering preterm infants was 16% if these women lived in the most  
42  
43 deprived neighborhood and it was 1% if they lived in the least deprived neighborhood. Overall,  
44  
45 the findings suggest the importance of neighborhoods on maternal health (in general) and more  
46  
47 specifically preterm birth.  
48  
49  
50  
51  
52

### 53 **Interpretation**

1  
2  
3 Although few previous studies assessed the association between the presence of both  
4 anxiety and depression during pregnancy and PTB, our finding is consistent with their findings  
5 that the presence of both anxiety and depression increases the risk of PTB.(14, 33, 34) This may  
6 be related to the additive effects of prenatal depression and anxiety and the effects of severity of  
7 anxiety and depressive symptoms. Previous studies conducted in the general population and in  
8 pregnant women found a higher score of anxiety or depression symptoms among those with both  
9 anxiety and depression than those with isolated anxiety or depression.(34, 35) – the findings are  
10 consistent with our findings. It is also reported in previous studies that individuals with both  
11 anxiety and depression have longer depressive episodes, worse psychosocial impairment, poorer  
12 response to medication, compromised quality of life, and increased suicidality than those with  
13 isolated anxiety or depression.(12, 33, 35) Thus, the presence of both anxiety and depression  
14 during pregnancy may lead to an increased risk of poor birth outcomes, including PTB, than  
15 depression or anxiety alone.  
16  
17  
18  
19  
20  
21  
22  
23  
24  
25  
26  
27  
28  
29  
30  
31  
32

33 Our study did not find an association between anxiety alone or depression alone and  
34 PTB, which is consistent with previous studies that analyzed isolated anxiety or depression  
35 separately from the presence of both or comorbid anxiety and depression.(14, 34) However, the  
36 finding is inconsistent with several previous studies that analyzed anxiety or depression  
37 intermixing with the presence of both conditions.(8, 10) It is possible that the association  
38 described in the literature requires high levels of anxiety or depression, which is more likely  
39 present in the presence of both anxiety and depression symptoms or disorders. Thus, the  
40 associations found in previous studies may have been confounded by the presence of both  
41 anxiety and depression symptoms or comorbid anxiety and depression disorders. The increased  
42 risk of PTB associated with the presence of both anxiety and depression (but not with isolated  
43  
44  
45  
46  
47  
48  
49  
50  
51  
52  
53  
54  
55  
56  
57  
58  
59  
60



1  
2  
3 anxiety or depression) may, in part, explain the inconsistencies across previous findings on the  
4 association between prenatal anxiety or depression and PTB. Similarly, previous studies did not  
5 analyze the association stratified by neighborhood SES, meaning that these studies averaged the  
6 association across neighborhood SES, which may also explain the inconsistencies across  
7 previous studies findings.  
8  
9  
10  
11  
12  
13

14 A strong association between the presence of both anxiety and depression and PTB  
15 among women living in a relatively more deprived neighborhood may reflect that, besides  
16 individual level risk factors, the risk of PTB is related to neighborhood factors.(16-18) For  
17 example, women living in deprived neighborhoods often have less access to healthy foods,  
18 quality health services, and opportunities for leisure activity, and have more exposure to societal  
19 stressors and crimes.(16-19) Anxious and depressed women living in less advantaged areas may  
20 interpret the deprivation associated stressors more acutely and have less support or are less able  
21 to manage or cope with their stressors, making them severely emotionally distressed compared to  
22 those living in more advantaged areas.(8, 11, 36, 37) Consequently, the elevated risk of  
23 delivering preterm is more likely to occur in this group of women. However, it is important to  
24 note that, the relationship between mental illness and impoverishment is difficult to interpret as  
25 causal, given the bi-directional relationship between them. Furthermore, in our study, the group  
26 of women with both anxiety and depression (who often have severe symptoms of anxiety or  
27 depression) in the least deprived neighborhoods had exceptionally low rate of PTB. The  
28 observed association between the presence of both anxiety and depression and PTB among  
29 women living in a relatively more deprived neighborhood seems to depend on this result. Thus,  
30 the replication of this finding seems important.  
31  
32  
33  
34  
35  
36  
37  
38  
39  
40  
41  
42  
43  
44  
45  
46  
47  
48  
49  
50  
51  
52  
53  
54  
55  
56  
57  
58  
59  
60

### Strengths and limitations

To our knowledge, few studies have directly examined the presence of both depressive and anxious symptoms versus isolated depressive or anxious symptoms as risk factors of PTB, and no studies have examined neighborhood SES as a modifier to the relationship between anxiety and/or depression and PTB. This study is important given its focus on the commonest psychological condition (i.e., comorbid anxiety and depression) and the importance of identification of specific groups of women who may benefit the most from the preventive interventions. This study used two community-based prospective pregnancy cohort studies. This provided an opportunity to describe PTB across the several strata of anxiety, depression, and both anxiety and depression and neighborhood SES in a relatively representative sample (compared, for example, to a hospital- or clinic-based sample) of pregnant women. However, even using the two cohorts, some strata had few cases of preterm infants, which may have led to the observed imprecise and/or insignificant estimates (specifically in a group with depression alone). As these cohorts over-represent women with high SES,(21, 38, 39) it limits the generalizability of the findings to other demographic groups. While the use of prospective measurement of depression and anxiety reduces the chance of misclassifications due to recall bias, the use of self-reported anxiety and depression measurement scales may have introduced measurement inaccuracy. Specifically, the EPDS-3A tends to provide high false-positive results. (28, 29) Furthermore, the EPDS-3A is a subscale of the EPDS. The standard cut-off point for the EPDS excluding the items of the EPDS-3A has not been established. While the use of a single scale may overestimate the presence of anxiety and/or depression, being able to identify combined anxiety and depression group using a single scale is advantageous as it facilitates for intervention design. While we examined the association between anxiety and/or depression and

1  
2  
3 PTB analyzing the influence of several potential confounders, other confounders such as  
4  
5 antidepressant use, other psychiatric conditions, and medical risk factors that may influence the  
6  
7 associations were not considered due to data limitation. Similarly, we were not able to separate  
8  
9 out spontaneous and iatrogenic PTB in the model – the association might be stronger with a  
10  
11 focus on spontaneous PTB. Overall, replication of this study addressing these limitations may  
12  
13 further the understanding on risk factors and preventive strategies of PTB.  
14  
15

## 16 17 **Conclusions**

18  
19 Our study found that the presence of both prenatal anxiety and depression increases the  
20  
21 risk of PTB and the risk is higher for women living in low SES neighborhoods compared to  
22  
23 women living in high SES neighborhoods. The finding informs that an intervention strategy that  
24  
25 focuses on a group of women with a presence of both anxiety and depression and living in the  
26  
27 most deprived neighborhood may reduce the risk of PTB. Furthermore, future research that  
28  
29 examines the influence of severity of anxiety and depression on risk of PTB may further the  
30  
31 understanding on risk factors and preventive strategies of PTB. A strategy that identifies and  
32  
33 manages anxiety and depression prior to pregnancy should be a priority.  
34  
35  
36  
37  
38  
39  
40  
41  
42  
43  
44  
45  
46  
47  
48  
49  
50  
51  
52  
53  
54  
55  
56  
57  
58  
59  
60

### **Authors contributions**

Kamala Adhikari involved in the conception and design of the study. Kamala is also responsible for conducting the analysis, interpreting the data, and drafting the manuscript. Amy Metcalfe provided overall supervision to Kamala in conducting this study and contributed to conception and study design, interpretation of data, provided intellectual content and revisions to manuscript. Scott Patten, Tyler Williamson, Alka B Patel, Shahirose Premji, Suzanne Tough, Nicole Letourneau, and Gerald Giesbrecht were involved in the conception and design of the study and provided interpretation and intellectual content to subsequent drafts of the manuscript. All authors read and approved the final draft.

### **Acknowledgements**

Kamala Adhikari was awarded the Vanier Canada Graduate Scholarship and the Alberta Innovates Graduate Studentship Award. Amy Metcalfe is supported by a Canadian Institutes of Health Research New Investigator Award. We acknowledge the All Our Families and the Alberta Pregnancy Outcomes and Nutrition cohort study teams for providing permission to use their data. We acknowledge SAGE (Secondary Analysis to Generate Evidence), the secure data repository developed by PolicyWise for Children and Families, which houses these datasets, for providing access to these datasets.

### **Role of funding agency**

Kamala Adhikari was awarded the Vanier Canada Graduate Scholarship (Award code: 201611CGV-382013-267341) by the Canadian Institutes of Health Research and the Alberta Innovates Graduate Studentship Award (Award code: 201611CGV-382013-267341) by the

1  
2  
3 Alberta Innovates to conduct this study. The funding agencies have no role in study design, data  
4 access, analysis, and interpretation, manuscript writing, and in the decision to submit the article  
5 for publication.  
6  
7  
8  
9

### 10 11 12 **Data sharing**

13  
14 Additional data such as statistical codes, supplementary tables, and technical appendix are  
15 available upon request (by emailing Kamala Adhikari: kamala.adhikaridahal@ucalgary.ca)  
16  
17  
18  
19

### 20 21 22 **Ethical statements**

23  
24 Ethics approval for this study was obtained from the Conjoint Health Research Ethics Board at  
25 the University of Calgary (REB16-2548\_REN1). This study used secondary data and all the data  
26 were anonymized; therefore, did not require informed consent.  
27  
28  
29  
30

### 31 32 33 **Competing interests**

34  
35 The authors declare that they have no competing interests.  
36  
37  
38  
39  
40  
41  
42  
43  
44  
45  
46  
47  
48  
49  
50  
51  
52  
53  
54  
55  
56  
57  
58  
59  
60

## References

1. Blencowe H, Cousens S, Oestergaard MZ, et al. National, regional, and worldwide estimates of preterm birth rates in the year 2010 with time trends since 1990 for selected countries: a systematic analysis and implications. *Lancet* 2012;379(9832):2162-72.
2. Liu L, Johnson HL, Cousens S, et al. Global, regional, and national causes of child mortality: an updated systematic analysis for 2010 with time trends since 2000. *Lancet* 2012;379(9832):2151-61.
3. Johnston KM, Gooch K, Korol E, et al. The economic burden of prematurity in Canada. *BMC Pediatr* 2014;14:93.
4. Blencowe H, Cousens S, Chou D, et al. Born too soon: the global epidemiology of 15 million preterm births. *Reprod Health* 2013;10 Suppl 1:S2.
5. Ward RM, Beachy JC. Neonatal complications following preterm birth. *Bjog* 2003;110 Suppl 20:8-16.
6. Canadian Institute for Health Information. CIHI Snapshot: Inpatient Hospitalizations, Surgeries, Newborns and Childbirth Indicators. Canadian Institute of Health Information ([www.cihi.ca](http://www.cihi.ca)) 2016. Accessed on February 2019.
7. Ding XX, Wu YL, Xu SJ, et al. Maternal anxiety during pregnancy and adverse birth outcomes: a systematic review and meta-analysis of prospective cohort studies. *J Affect Disord* 2014;159:103-10.
8. Grote NK, Bridge JA, Gavin AR, et al. A meta-analysis of depression during pregnancy and the risk of preterm birth, low birth weight, and intrauterine growth restriction. *Arch Gen Psychiatry* 2010;67(10):1012-24.

- 1  
2  
3 9. Staneva A, Bogossian F, Pritchard M, et al. The effects of maternal depression, anxiety,  
4 and perceived stress during pregnancy on preterm birth: A systematic review. *Women Birth*  
5  
6 2015;28(3):179-93.  
7
- 8  
9  
10 10. Rose MS, Pana G, Premji S. Prenatal Maternal Anxiety as a Risk Factor for Preterm Birth  
11 and the Effects of Heterogeneity on This Relationship: A Systematic Review and Meta-Analysis.  
12  
13 *Biomed Res Int* 2016;2016:8312158.  
14
- 15  
16  
17 11. Alder J, Fink N, Bitzer J, et al. Depression and anxiety during pregnancy: a risk factor for  
18 obstetric, fetal and neonatal outcome? A critical review of the literature. *J Matern Fetal Neonatal*  
19  
20 *Med* 2007;20(3):189-209.  
21
- 22  
23  
24 12. Misri S, Swift E. Generalized Anxiety Disorder and Major Depressive Disorder in  
25 Pregnant and Postpartum Women: Maternal Quality of Life and Treatment Outcomes. *J Obstet*  
26  
27 *Gynaecol Can* 2015;37(9):798-803.  
28
- 29  
30  
31 13. Wenzel A, Haugen EN, Jackson LC, et al. Anxiety symptoms and disorders at eight  
32 weeks postpartum. *J Anxiety Disord* 2005;19(3):295-311.  
33
- 34  
35  
36 14. Field T, Diego M, Hernandez-Reif M, et al. Comorbid depression and anxiety effects on  
37 pregnancy and neonatal outcome. *Infant Behav Dev* 2010;33(1):23-9.  
38
- 39  
40  
41 15. Yang S, Kestens Y, Dahhou M, et al. Neighborhood deprivation and maternal  
42 psychological distress during pregnancy: a multilevel analysis. *Matern Child Health J*  
43  
44 2015;19(5):1142-51.  
45
- 46  
47  
48 16. Berkman LA, Kawachi I. Neighborhood and Health. New York: Oxford  
49 University Press Inc. 2003.  
50
- 51  
52  
53 17. Diez Roux AV, Mair C. Neighborhoods and health. *Ann N Y Acad Sci* 2010;1186:125-45.  
54  
55  
56  
57  
58  
59

- 1  
2  
3 18. Lynch JW, Kaplan GA. Socioeconomic Factors. In: Berkman LF and Karachi I (eds.).  
4  
5 Social Epidemiology. New York: Oxford University Press 2000.  
6
- 7  
8 19. Dunkel Schetter C. Psychological science on pregnancy: stress processes,  
9  
10 biopsychosocial models, and emerging research issues. *Annu Rev Psychol* 2011;62:531-58.  
11
- 12 20. Kaplan BJ, Giesbrecht GF, Leung BM, et al. The Alberta Pregnancy Outcomes and  
13  
14 Nutrition (APrON) cohort study: rationale and methods. *Matern Child Nutr* 2014;10(1):44-60.  
15
- 16 21. Leung BM, McDonald SW, Kaplan BJ, et al. Comparison of sample characteristics in  
17  
18 two pregnancy cohorts: community-based versus population-based recruitment methods. *BMC*  
19  
20 *Med Res Methodol* 2013;13:149.  
21
- 22 22. Roberts GBD. Analyses Based on Combining Similar Information from Multiple  
23  
24 Surveys. Section on Survey Research Methods Joint Statistical Meetings (JSM); 2009. p. 2138-  
25  
26 47.  
27
- 28 23. Cox JL, Holden JM, Sagovsky R. Detection of postnatal depression. Development of the  
29  
30 10-item Edinburgh Postnatal Depression Scale. *Br J Psychiatry* 1987;150:782-6.  
31  
32
- 33 24. Rubertsson C, Borjesson K, Berglund A, et al. The Swedish validation of Edinburgh  
34  
35 Postnatal Depression Scale (EPDS) during pregnancy. *Nord J Psychiatry* 2011;65(6):414-8.  
36  
37
- 38 25. Beck CT, Gable RK. Comparative analysis of the performance of the Postpartum  
39  
40 Depression Screening Scale with two other depression instruments. *Nurs Res* 2001;50(4):242-50.  
41  
42
- 43 26. Boyd RC, Le HN, Somberg R. Review of screening instruments for postpartum  
44  
45 depression. *Arch Womens Ment Health* 2005;8(3):141-53.  
46  
47
- 48 27. Gaynes BN, Gavin N, Meltzer-Brody S, et al. Perinatal depression: prevalence, screening  
49  
50 accuracy, and screening outcomes. *Evid Rep Technol Assess (Summ)* 2005(119):1-8.  
51  
52  
53  
54  
55  
56  
57  
58  
59  
60



- 1  
2  
3 28. Matthey S, Fisher J, Rowe H. Using the Edinburgh postnatal depression scale to screen  
4 for anxiety disorders: conceptual and methodological considerations. *J Affect Disord*  
5  
6 2013;146(2):224-30.  
7  
8  
9  
10 29. Matthey S. Using the Edinburgh Postnatal Depression Scale to screen for anxiety  
11 disorders. *Depress Anxiety* 2008;25(11):926-31.  
12  
13  
14 30. Pampalon R, Raymond G. A deprivation index for health and welfare planning in  
15 Quebec. *Chronic Dis Can* 2000;21(3):104-13.  
16  
17  
18 31. Alberta Health Services. How to use the Pampalon Deprivation Index in Alberta.  
19 *Research and Innovation, Alberta Health Services* 2016.  
20  
21  
22 32. Canadian Institute for Health Information. Reducing gaps in Health: A focus on  
23 socioeconomic status in Urban Canada. Ottawa, Ont. Canadian Institute for Health Information  
24 2008.  
25  
26  
27 33. Flynn HA, McBride N, Cely A, et al. Relationship of prenatal depression and  
28 comorbidities to infant outcomes. *CNS Spectr* 2015;20(1):20-8.  
29  
30  
31 34. Ibanez G, Charles MA, Forhan A, et al. Depression and anxiety in women during  
32 pregnancy and neonatal outcome: data from the EDEN mother-child cohort. *Early Hum Dev*  
33 2012;88(8):643-9.  
34  
35  
36 35. Pollack MH. Comorbid anxiety and depression. *J Clin Psychiatry* 2005;66 Suppl 8:22-9.  
37  
38 36. Kessler RC. Stress, social status, and psychological distress. *J Health Soc Behav*  
39 1979;20(3):259-72.  
40  
41  
42 37. Seguin L, Potvin L, St-Denis M, et al. Chronic stressors, social support, and depression  
43 during pregnancy. *Obstet Gynecol* 1995;85(4):583-9.  
44  
45  
46  
47  
48  
49  
50  
51  
52  
53  
54  
55  
56  
57  
58  
59  
60

- 1  
2  
3 38. McDonald SW, Lyon AW, Benzie KM, et al. The All Our Babies pregnancy cohort:  
4 design, methods, and participant characteristics. *BMC Pregnancy Childbirth* 2013;13 Suppl 1:S2.  
5  
6  
7 39. Gracie SK, Lyon AW, Kehler HL, et al. All Our Babies Cohort Study: recruitment of a  
8 cohort to predict women at risk of preterm birth through the examination of gene expression  
9 profiles and the environment. *BMC Pregnancy Childbirth* 2010;10:87.  
10  
11  
12  
13  
14  
15  
16  
17  
18  
19  
20  
21  
22  
23  
24  
25  
26  
27  
28  
29  
30  
31  
32  
33  
34  
35  
36  
37  
38  
39  
40  
41  
42  
43  
44  
45  
46  
47  
48  
49  
50  
51  
52  
53  
54  
55  
56  
57  
58  
59  
60

**Table 1: Distribution of maternal characteristics across anxiety and depression status during pregnancy**

| Maternal characteristics                                                                                                                                                                      | Absence of both anxiety and depression<br>n=4294 (82.1%)                                      | Presence of anxiety only<br>n=312 (6.0%)                                                   | Presence of depression only<br>n=220 (4.2%)                                               | Presence of both anxiety and depression<br>n=402 (7.7%)                                    | $\chi^2$<br>p-value |
|-----------------------------------------------------------------------------------------------------------------------------------------------------------------------------------------------|-----------------------------------------------------------------------------------------------|--------------------------------------------------------------------------------------------|-------------------------------------------------------------------------------------------|--------------------------------------------------------------------------------------------|---------------------|
|                                                                                                                                                                                               | n (%), 95% CI)                                                                                | n (%), 95% CI)                                                                             | n (%), 95% CI)                                                                            | n (%), 95% CI)                                                                             |                     |
| Maternal age<br>≥35yrs                                                                                                                                                                        | 886 (21.0, 19.8-22.3)                                                                         | 48 (15.5, 11.9-22.0)                                                                       | 59 (27.4, 21.9-33.8)                                                                      | 71 (18.4, 14.8-22.6)                                                                       | 0.006               |
| Marital status<br>Single/divorced/separated                                                                                                                                                   | 168 (3.9, 3.4-4.6)                                                                            | 22 (7.2, 4.8-10.7)                                                                         | 25 (11.5, 7.9-16.4)                                                                       | 47 (11.8, 8.9-15.4)                                                                        | <0.0001             |
| Ethnicity<br>Non-white                                                                                                                                                                        | 807 (19.0, 17.9-20.2)                                                                         | 68 (22.2, 17.8-27.1)                                                                       | 67 (30.9, 25.1-37.3)                                                                      | 143 (36.1, 31.5-40.9)                                                                      | <0.0001             |
| Duration of stay in Canada<br>Born/5 years+<br><5 years                                                                                                                                       | 3841 (91.6, 90.7-92.4)<br>352 (8.4, 7.6-9.3)                                                  | 275 (89.9, 85.9-92.8)<br>31 (10.1, 7.2-14.1)                                               | 185 (87.3, 82.1-91.1)<br>27 (12.7, 8.9-17.9)                                              | 329 (84.4, 80.4-87.6)<br>61 (15.6, 12.4-19.6)                                              | <0.0001             |
| Body mass index<br>Underweight (<18.5kg/m <sup>2</sup> )<br>Normal weight (18.5 - 24.99 kg/m <sup>2</sup> )<br>Overweight (25 - 29.99 kg/m <sup>2</sup> )<br>Obesity (≥30 kg/m <sup>2</sup> ) | 170 (4.2, 3.6-4.9)<br>2552 (63.2, 61.7-64.7)<br>882 (21.9, 20.6-23.1)<br>432 (10.7, 9.8-11.7) | 12 (4.1, 2.3-7.1)<br>172 (58.5, 52.8-64.0)<br>59 (20.1, 15.9-25.0)<br>51 (17.4, 13.4-22.1) | 11 (5.3, 2.9-9.3)<br>125 (59.8, 53.0-66.2)<br>50 (23.9, 18.6-30.2)<br>23 (11.0, 7.4-16.0) | 21 (5.6, 3.7-8.4)<br>220 (58.4, 53.3-63.2)<br>73 (19.4, 15.7-23.7)<br>63 (16.7, 13.3-20.8) | 0.002               |
| Parity<br>Primiparous                                                                                                                                                                         | 2106 (49.7, 48.2-51.2)                                                                        | 109 (35.4, 30.2-40.9)                                                                      | 111 (51.2, 44.5-57.7)                                                                     | 190 (48.1, 43.2-53.0)                                                                      | <0.0001             |
| Unintended pregnancy                                                                                                                                                                          | 742 (17.4, 16.3-18.6)                                                                         | 70 (22.6, 18.3-27.6)                                                                       | 72 (32.9, 27.0-39.4)                                                                      | 122 (30.7, 26.3-35.4)                                                                      | <0.0001             |
| Smoked before pregnancy                                                                                                                                                                       | 822 (19.3, 18.2-20.6)                                                                         | 86 (27.9, 23.2-33.2)                                                                       | 61 (28.0, 22.4-34.3)                                                                      | 123 (30.9, 26.56-4.6)                                                                      | <0.0001             |
| Alcohol consumption before pregnancy                                                                                                                                                          | 3603 (84.7, 83.6-85.8)                                                                        | 268 (87.0, 82.8-90.3)                                                                      | 181 (82.7, 77.1-87.1)                                                                     | 305 (76.6, 72.2-80.5)                                                                      | <0.0001             |
| Drug abuse before pregnancy                                                                                                                                                                   | 561 (13.2, 12.2-14.2)                                                                         | 61 (19.9, 15.8-24.7)                                                                       | 44 (20.4, 15.5-26.3)                                                                      | 83 (20.8, 17.1-25.1)                                                                       | <0.0001             |
| Maternal education<br>High school or less than high school<br>Some post-secondary<br>Completed post-secondary                                                                                 | 451 (10.6, 9.7-11.6)<br>669 (15.8, 14.7-16.9)<br>3121 (73.6, 72.2-74.9)                       | 49 (16.2, 12.5-20.8)<br>57 (18.9, 14.8-23.7)<br>196 (64.9, 59.4-70.1)                      | 42 (19.4, 14.7-25.3)<br>35 (16.2, 11.9-21.7)<br>139 (64.4, 57.7-70.5)                     | 68 (17.3, 13.9-21.4)<br>96 (24.4, 20.4-28.9)<br>229 (58.3, 53.3-63.1)                      | <0.0001             |

| Maternal characteristics                           | Absence of both anxiety and depression<br>n=4294 (82.1%) | Presence of anxiety only<br>n=312 (6.0%) | Presence of depression only<br>n=220 (4.2%) | Presence of both anxiety and depression<br>n=402 (7.7%) | $\chi^2$<br>p-value |
|----------------------------------------------------|----------------------------------------------------------|------------------------------------------|---------------------------------------------|---------------------------------------------------------|---------------------|
|                                                    | n (%), 95% CI)                                           | n (%), 95% CI)                           | n (%), 95% CI)                              | n (%), 95% CI)                                          |                     |
| Household income                                   |                                                          |                                          |                                             |                                                         | <0.0001             |
| <\$40,000                                          | 325 (7.8, 7.1-8.7)                                       | 25 (8.4, 5.7-12.1)                       | 40 (18.6, 13.9-24.4)                        | 85 (22.0, 18.2-26.4)                                    |                     |
| \$40,000 - <\$70,000                               | 542 (13.0, 12.8-14.1)                                    | 53 (17.8, 13.8-22.6)                     | 43 (20.0, 15.9-25.9)                        | 83 (21.5, 17.7-25.7)                                    |                     |
| \$70,000 - <\$100,000                              | 989 (23.8, 22.5-25.1)                                    | 76 (25.5, 20.9-30.8)                     | 52 (24.2, 18.9-30.4)                        | 85 (22.0, 18.2-26.4)                                    |                     |
| ≥\$100,000                                         | 2301 (55.4, 53.8-56.9)                                   | 144 (48.3, 42.7-54.0)                    | 80 (37.2, 31.0-43.9)                        | 133 (34.5, 29.9-39.3)                                   |                     |
| Inadequate social support anytime during pregnancy | 731 (17.1, 16.0-18.3)                                    | 77 (25.0, 20.5-30.1)                     | 127 (57.4, 51.3-64.4)                       | 210 (52.4, 47.5-57.2)                                   | <0.0001             |
| Neighborhood deprivation index                     |                                                          |                                          |                                             |                                                         | <0.0001             |
| Quintile 1 (least deprived)                        | 1108 (27.7, 26.3-29.1)                                   | 68 (24.3, 19.6-29.7)                     | 51 (24.9, 19.4-31.3)                        | 80 (22.4, 18.3-26.9)                                    |                     |
| Quintile 2                                         | 1045 (26.1, 24.8-27.5)                                   | 82 (29.3, 24.3-34.9)                     | 41 (20.0, 15.1-26.0)                        | 83 (23.2, 19.1-27.8)                                    |                     |
| Quintile 3                                         | 800 (20.0, 18.8-21.3)                                    | 64 (22.9, 18.3-28.1)                     | 39 (19.0, 14.2-24.9)                        | 65 (18.2, 14.5-22.5)                                    |                     |
| Quintile 4                                         | 618 (15.5, 14.4-16.6)                                    | 37 (13.2, 9.7-17.7)                      | 30 (14.6, 10.4-20.2)                        | 47 (13.1, 10.0-17.0)                                    |                     |
| Quintile 5 (most deprived)                         | 429 (10.7, 9.8-11.7)                                     | 29 (10.4, 7.3-14.5)                      | 44 (21.5, 16.4-27.6)                        | 83 (23.2, 19.1-27.8)                                    |                     |
| Preterm birth                                      | 276 (6.9, 6.1-7.7)                                       | 19 (6.5, 4.2-10.0)                       | 16 (8.2, 5.1-12.9)                          | 37 (10.6, 7.8-14.3)                                     | 0.068               |

Sample size between variables differs as missing values were deleted using variable wise or pair wise deletion approach

**Table 2: Association between anxiety and depression status during pregnancy and preterm birth<sup>a</sup>**

| Anxiety and depression status during pregnancy <sup>b</sup> | Overall OR (95%CI) | Stratified by neighborhood deprivation indices (quintile) |                       |                       |                                          |
|-------------------------------------------------------------|--------------------|-----------------------------------------------------------|-----------------------|-----------------------|------------------------------------------|
|                                                             |                    | Quintile 1 <sup>c</sup> OR(95%CI)                         | Quintile 2 OR (95%CI) | Quintile 3 OR (95%CI) | Quintile 4 and 5 <sup>d</sup> OR (95%CI) |
| Presence of anxiety only                                    | 0.9 (0.5-1.4)      | 0.6 (0.2-1.9)                                             | 0.72 (0.3-2.1)        | 1.1 (0.4-3.0)         | 1.0 (0.4-2.8)                            |
| Presence of depression only                                 | 1.3 (0.8-2.2)      | 0.6 (0.18-2.0)                                            | 0.9 (0.2-3.8)         | 1.9 (0.8-6.6)         | 2.7 (0.9-7.3)                            |
| Presence of both anxiety and depression                     | 1.6 (1.1-2.3)      | 0.2 (0.02-1.3)                                            | 1.4 (0.6-3.4)         | 2.7 (1.3-6.1)         | 2.3 (1.3-4.1)                            |

<sup>a</sup>Adjusted for parity, ethnicity, and body mass index; <sup>b</sup>absence of both anxiety and depression as a reference group; <sup>c</sup>quintile 1: least deprived neighborhood; <sup>d</sup>quintile 5: most deprived neighborhood (quintile 4 and 5 were combined due to few or no cases in some strata); OR: odds ratio; CI: confidence interval

**Table 3: Predicted marginal prevalence of preterm birth<sup>a</sup>**

| Anxiety and depression status during pregnancy <sup>b</sup> | Overall % (95%CI) | Stratified by neighborhood deprivation indices (quintile) |                      |                      |                                         |
|-------------------------------------------------------------|-------------------|-----------------------------------------------------------|----------------------|----------------------|-----------------------------------------|
|                                                             |                   | Quintile 1 <sup>b</sup> % (95%CI)                         | Quintile 2 % (95%CI) | Quintile 3 % (95%CI) | Quintile 4 and 5 <sup>c</sup> % (95%CI) |
| Absence of both anxiety and depression                      | 7.1 (6.8-13.1)    | 7.6 (5.6-9.3)                                             | 6.4 (4.8-7.9)        | 6.9 (5.06-8.8)       | 7.6 (5.9-9.3)                           |
| Presence of anxiety only                                    | 6.3 (3.3-9.1)     | 5.4 (0.2-10.7)                                            | 4.9 (0.3-9.5)        | 6.5 (0.34-12.7)      | 7.9 (1.3-14.6)                          |
| Presence of depression only                                 | 9.6 (5.2-14.1)    | 4.7 (0.5-10.4)                                            | 5.7 (0.45-13.4)      | 13.3 (3.4-23.2)      | 14.0 (2.7-25.3)                         |
| Presence of both anxiety and depression                     | 10.0 (6.8-13.1)   | 1.4 (0.04-4.2)                                            | 8.0 (1.9-14.1)       | 15.9 (6.3-25.6)      | 15.7 (9.5-22.6)                         |

<sup>a</sup>Adjusted for parity, ethnicity, and body mass index; <sup>b</sup>quintile 1: least deprived neighborhood; <sup>c</sup>quintile 5: most deprived neighborhood (quintile 4 and 5 were combined due to few or no cases in some strata); OR: odds ratio; CI: confidence interval

**STROBE 2007 (v4) Statement—Checklist of items that should be included in reports of *cohort studies***

| Section/Topic                | Item # | Recommendation                                                                                                                                                                       | Reported on page # |
|------------------------------|--------|--------------------------------------------------------------------------------------------------------------------------------------------------------------------------------------|--------------------|
| <b>Title and abstract</b>    | 1      | (a) Indicate the study's design with a commonly used term in the title or the abstract                                                                                               | 1                  |
|                              |        | (b) Provide in the abstract an informative and balanced summary of what was done and what was found                                                                                  | 3, 4, and 5        |
| <b>Introduction</b>          |        |                                                                                                                                                                                      |                    |
| Background/rationale         | 2      | Explain the scientific background and rationale for the investigation being reported                                                                                                 | 6 and 7            |
| Objectives                   | 3      | State specific objectives, including any prespecified hypotheses                                                                                                                     | 7                  |
| <b>Methods</b>               |        |                                                                                                                                                                                      |                    |
| Study design                 | 4      | Present key elements of study design early in the paper                                                                                                                              | 7 and 8            |
| Setting                      | 5      | Describe the setting, locations, and relevant dates, including periods of recruitment, exposure, follow-up, and data collection                                                      | 7 and 8            |
| Participants                 | 6      | (a) Give the eligibility criteria, and the sources and methods of selection of participants. Describe methods of follow-up                                                           | 7                  |
|                              |        | (b) For matched studies, give matching criteria and number of exposed and unexposed                                                                                                  | Not applicable     |
| Variables                    | 7      | Clearly define all outcomes, exposures, predictors, potential confounders, and effect modifiers. Give diagnostic criteria, if applicable                                             | 8, 9, 10           |
| Data sources/<br>measurement | 8*     | For each variable of interest, give sources of data and details of methods of assessment (measurement). Describe comparability of assessment methods if there is more than one group | 8, 9, 10           |
| Bias                         | 9      | Describe any efforts to address potential sources of bias                                                                                                                            | 8, 9, 10           |
| Study size                   | 10     | Explain how the study size was arrived at                                                                                                                                            | Not applicable     |
| Quantitative variables       | 11     | Explain how quantitative variables were handled in the analyses. If applicable, describe which groupings were chosen and why                                                         | 9, 10              |
| Statistical methods          | 12     | (a) Describe all statistical methods, including those used to control for confounding                                                                                                | 9, 10              |
|                              |        | (b) Describe any methods used to examine subgroups and interactions                                                                                                                  | 9, 10              |
|                              |        | (c) Explain how missing data were addressed                                                                                                                                          | 10                 |
|                              |        | (d) If applicable, explain how loss to follow-up was addressed                                                                                                                       | Not applicable     |
|                              |        | (e) Describe any sensitivity analyses                                                                                                                                                | Not applicable     |

|                          |     |                                                                                                                                                                                                              |                                                |
|--------------------------|-----|--------------------------------------------------------------------------------------------------------------------------------------------------------------------------------------------------------------|------------------------------------------------|
| <b>Results</b>           |     |                                                                                                                                                                                                              |                                                |
| Participants             | 13* | (a) Report numbers of individuals at each stage of study—eg numbers potentially eligible, examined for eligibility, confirmed eligible, included in the study, completing follow-up, and analysed            | N/A                                            |
|                          |     | (b) Give reasons for non-participation at each stage                                                                                                                                                         | N/A                                            |
|                          |     | (c) Consider use of a flow diagram                                                                                                                                                                           | Not provided now: can be provided if requested |
| Descriptive data         | 14* | (a) Give characteristics of study participants (eg demographic, clinical, social) and information on exposures and potential confounders                                                                     | 10, 11, 12, Table 1                            |
|                          |     | (b) Indicate number of participants with missing data for each variable of interest                                                                                                                          | 10                                             |
|                          |     | (c) Summarise follow-up time (eg, average and total amount)                                                                                                                                                  | N/A                                            |
| Outcome data             | 15* | Report numbers of outcome events or summary measures over time                                                                                                                                               | 10, Table 2                                    |
| Main results             | 16  | (a) Give unadjusted estimates and, if applicable, confounder-adjusted estimates and their precision (eg, 95% confidence interval). Make clear which confounders were adjusted for and why they were included | 11, Table 2 and 3                              |
|                          |     | (b) Report category boundaries when continuous variables were categorized                                                                                                                                    | Not applicable                                 |
|                          |     | (c) If relevant, consider translating estimates of relative risk into absolute risk for a meaningful time period                                                                                             | Not done                                       |
| Other analyses           | 17  | Report other analyses done—eg analyses of subgroups and interactions, and sensitivity analyses                                                                                                               | 11 and Table 2                                 |
| <b>Discussion</b>        |     |                                                                                                                                                                                                              |                                                |
| Key results              | 18  | Summarise key results with reference to study objectives                                                                                                                                                     | 12                                             |
| <b>Limitations</b>       |     |                                                                                                                                                                                                              |                                                |
| Interpretation           | 20  | Give a cautious overall interpretation of results considering objectives, limitations, multiplicity of analyses, results from similar studies, and other relevant evidence                                   | 12, 13, 14, 15                                 |
| Generalisability         | 21  | Discuss the generalisability (external validity) of the study results                                                                                                                                        | 15                                             |
| <b>Other information</b> |     |                                                                                                                                                                                                              |                                                |
| Funding                  | 22  | Give the source of funding and the role of the funders for the present study and, if applicable, for the original study on which the present article is based                                                | 17, 18                                         |

\*Give information separately for cases and controls in case-control studies and, if applicable, for exposed and unexposed groups in cohort and cross-sectional studies.



1  
2  
3  
4  
5  
6  
7  
8  
9  
10  
11  
12  
13  
14  
15  
16  
17  
18  
19  
20  
21  
22  
23  
24  
25  
26  
27  
28  
29  
30  
31  
32  
33  
34  
35  
36  
37  
38  
39  
40  
41  
42  
43  
44  
45  
46

**Note:** An Explanation and Elaboration article discusses each checklist item and gives methodological background and published examples of transparent reporting. The STROBE checklist is best used in conjunction with this article (freely available on the Web sites of PLoS Medicine at <http://www.plosmedicine.org/>, Annals of Internal Medicine at <http://www.annals.org/>, and Epidemiology at <http://www.epidem.com/>). Information on the STROBE Initiative is available at [www.strobe-statement.org](http://www.strobe-statement.org).

For peer review only

# BMJ Open

## Neighborhood socioeconomic status modifies the association between anxiety and depression during pregnancy and preterm birth: A Community-based Canadian Cohort Study

|                                 |                                                                                                                                                                                                                                                                                                                                                                                                                                                                           |
|---------------------------------|---------------------------------------------------------------------------------------------------------------------------------------------------------------------------------------------------------------------------------------------------------------------------------------------------------------------------------------------------------------------------------------------------------------------------------------------------------------------------|
| Journal:                        | <i>BMJ Open</i>                                                                                                                                                                                                                                                                                                                                                                                                                                                           |
| Manuscript ID                   | bmjopen-2019-031035.R1                                                                                                                                                                                                                                                                                                                                                                                                                                                    |
| Article Type:                   | Original research                                                                                                                                                                                                                                                                                                                                                                                                                                                         |
| Date Submitted by the Author:   | 11-Nov-2019                                                                                                                                                                                                                                                                                                                                                                                                                                                               |
| Complete List of Authors:       | Adhikari, Kamala; University of Calgary Cumming School of Medicine<br>Patten, Scott<br>Williamson, Tyler; University of Calgary Cumming School of Medicine, Community Health Sciences<br>Patel, Alka<br>Premji, Shahirose ; York University,<br>Tough, Suzanne ; University of Calgary Cumming School of Medicine, Paediatrics and Community Health Science<br>Letourneau, Nicole<br>Giesbrecht, Gerald<br>Metcalf, Amy; University of Calgary, Obstetrics and Gynecology |
| <b>Primary Subject Heading</b>: | Epidemiology                                                                                                                                                                                                                                                                                                                                                                                                                                                              |
| Secondary Subject Heading:      | Mental health, Obstetrics and gynaecology, Public health                                                                                                                                                                                                                                                                                                                                                                                                                  |
| Keywords:                       | MENTAL HEALTH, EPIDEMIOLOGY, Preterm birth, Neighbourhood socioeconomic status                                                                                                                                                                                                                                                                                                                                                                                            |
|                                 |                                                                                                                                                                                                                                                                                                                                                                                                                                                                           |

SCHOLARONE™  
Manuscripts



I, the Submitting Author has the right to grant and does grant on behalf of all authors of the Work (as defined in the below author licence), an exclusive licence and/or a non-exclusive licence for contributions from authors who are: i) UK Crown employees; ii) where BMJ has agreed a CC-BY licence shall apply, and/or iii) in accordance with the terms applicable for US Federal Government officers or employees acting as part of their official duties; on a worldwide, perpetual, irrevocable, royalty-free basis to BMJ Publishing Group Ltd ("BMJ") its licensees and where the relevant Journal is co-owned by BMJ to the co-owners of the Journal, to publish the Work in this journal and any other BMJ products and to exploit all rights, as set out in our [licence](#).

The Submitting Author accepts and understands that any supply made under these terms is made by BMJ to the Submitting Author unless you are acting as an employee on behalf of your employer or a postgraduate student of an affiliated institution which is paying any applicable article publishing charge ("APC") for Open Access articles. Where the Submitting Author wishes to make the Work available on an Open Access basis (and intends to pay the relevant APC), the terms of reuse of such Open Access shall be governed by a Creative Commons licence – details of these licences and which [Creative Commons](#) licence will apply to this Work are set out in our licence referred to above.

Other than as permitted in any relevant BMJ Author's Self Archiving Policies, I confirm this Work has not been accepted for publication elsewhere, is not being considered for publication elsewhere and does not duplicate material already published. I confirm all authors consent to publication of this Work and authorise the granting of this licence.

1  
2  
3  
4 **Neighborhood socioeconomic status modifies the association between anxiety and**  
5  
6 **depression during pregnancy and preterm birth: A Community-based Canadian Cohort**  
7  
8 **Study**  
9

10  
11  
12  
13 Kamala Adhikari<sup>1</sup>, Scott B Patten<sup>1</sup>, Tyler Williamson<sup>1</sup>, Alka B Patel<sup>1,2</sup>, Shahirose Premji<sup>3</sup>,  
14  
15 Suzanne Tough<sup>1,4</sup>, Nicole Letourneau<sup>1,4,5,8</sup>, Gerald Giesbrecht<sup>1,4</sup>, Amy Metcalfe<sup>1,6,7</sup>  
16  
17

18  
19  
20 <sup>1</sup>Department of Community Health Sciences, University of Calgary, Calgary, Canada; <sup>2</sup>Applied  
21  
22 Research and Evaluation- Primary Health Care, Alberta Health Services, Calgary,  
23  
24 Canada; <sup>3</sup>School of Nursing, Faculty of Health, York University, Calgary, Canada; <sup>4</sup>Department  
25  
26 of Pediatrics, University of Calgary, Calgary, Canada; <sup>5</sup>Faculty of Nursing University of  
27  
28 Calgary, Calgary, Canada; <sup>6</sup>Department of Obstetrics and Gynecology, University of Calgary,  
29  
30 Calgary, Canada; <sup>7</sup>Department of Medicine, University of Calgary, Calgary, Canada; <sup>8</sup>Department  
31  
32 of Psychiatry, University of Calgary, Calgary, Canada  
33  
34  
35  
36  
37  
38

39 **Corresponding author:**

40  
41 Kamala Adhikari

42  
43 Department of Community Health Sciences, University of Calgary

44  
45 3280 Hospital Drive NW, Calgary, AB, T2N 4Z6

46  
47 Email: [kamala.adhikaridahal@ucalgary.ca](mailto:kamala.adhikaridahal@ucalgary.ca)

48  
49 Telephone number: 1+5870-700-7531

50  
51  
52 ORCID number: 0000-0003-2872-9496  
53  
54  
55  
56  
57  
58  
59  
60

1  
2  
3  
4  
5  
6  
7  
8  
9  
10  
11  
12  
13  
14  
15  
16  
17  
18  
19  
20  
21  
22  
23  
24  
25  
26  
27  
28  
29  
30  
31  
32  
33  
34  
35  
36  
37  
38  
39  
40  
41  
42  
43  
44  
45  
46  
47  
48  
49  
50  
51  
52  
53  
54  
55  
56  
57  
58  
59  
60

**Word Count: 3604**

For peer review only

## Abstract

**Objective:** This study examined the association of anxiety alone, depression alone, and the presence of both anxiety and depression with PTB and further examined whether neighborhood socioeconomic status (SES) modified this association.

**Design:** Cohort study using individual-level data from two community-based prospective pregnancy cohort studies (All Our Families (AOF)) and Alberta Pregnancy Outcomes and Nutrition (APrON)) and neighborhood SES data from the 2011 Canadian census.

**Setting:** Calgary, Alberta, Canada

**Participants:** Overall, 5,538 pregnant women who were <27 weeks of gestation and >15 years old were enrolled in the cohort studies between 2008 and 2012. 3,341 women participated in the AOF study and 2,187 women participated in the APrON study, with 231 women participated in both studies. Women who participated in both studies were only counted once.

**Primary and secondary outcome measures:** PTB was defined as delivery prior to 37 weeks of gestation. Depression was defined as an Edinburgh Postnatal Depression Scale (EPDS) score of  $\geq 13$ , anxiety was defined as an EPDS-anxiety subscale score of  $\geq 6$ , and the presence of both anxiety and depression was defined as meeting both anxiety and depression definitions.

**Results:** Overall, 7.3% of women delivered preterm infants. The presence of both anxiety and depression, but neither of these conditions alone, was significantly associated with PTB

1  
2  
3 (OR=1.6, 95% CI=1.1, 2.3) and had significant interaction with neighborhood deprivation (p-  
4 value=0.004). The predicted probability of PTB for women with both anxiety and depression  
5 was 10.0%, which increased to 15.7% if they lived in the most deprived neighborhoods and  
6 decreased to 1.4% if they lived in the least deprived neighborhoods.  
7  
8  
9  
10  
11  
12  
13

14 **Conclusions:** Effects of anxiety and depression on risk of PTB differ depending on where  
15 women live. This understanding may guide the identification of women at increased risk for PTB  
16 and allocation of resources for early identification and management of anxiety and depression.  
17  
18  
19  
20  
21  
22  
23

24 **Keywords:** anxiety and depression, neighborhood socioeconomic status, deprivation, preterm  
25 birth  
26  
27  
28  
29  
30  
31  
32  
33  
34  
35  
36  
37  
38  
39  
40  
41  
42  
43  
44  
45  
46  
47  
48  
49  
50  
51  
52  
53  
54  
55  
56  
57  
58  
59  
60

### Article summary: strengths and limitations of this study

- This study used data from two community-based prospective pregnancy cohort studies that were conducted in a relatively representative sample (compared to a hospital-based or clinic-based sample) of pregnant women.
- This study performed detail analysis about the relationship between anxiety and depression during pregnancy and preterm birth by examining the presence of both depressive and anxious symptoms versus isolated depressive or anxious symptoms as risk factors of preterm birth, and further examining whether neighborhood socioeconomic status modifies the relationship.
- This study analyzed overall preterm birth as data on spontaneous and iatrogenic preterm birth were not available.
- The study sample over-represents women from urban areas of Alberta, with high socioeconomic status, thus limiting the generalizability of the findings to urban settings.
- The use of self-reported anxiety and depression measurement scales may introduce measurement inaccuracy.



## BACKGROUND

Worldwide, a total of 15 million births occur preterm (i.e., before 37 weeks of gestation), with a global average rate of 11.1%.<sup>(1)</sup> Preterm birth (PTB) is responsible for 35% of neonatal deaths globally.<sup>(2)</sup> Among survivors, it is also a significant risk factor for short and long-term morbidities, such as respiratory distress syndrome, cerebral palsy, and learning difficulties.<sup>(3-5)</sup> Despite substantial research and interventions to prevent PTB, the incidence of PTB has not declined and its etiology remains unclear.<sup>(1, 6)</sup> Understanding the risk factors for PTB, such as psychosocial distress and neighborhood low socioeconomic status (SES), may help identify women at increased risk, and assist in the allocation of resources, ultimately reducing the incidence of PTB.

PTB has been linked to psychosocial distress during pregnancy, specifically anxiety and depression – the most common mental health problems during pregnancy.<sup>(7-10)</sup> However, the association between anxiety and depression during pregnancy and PTB is incompletely understood. Many previous studies on the association between anxiety and depression and PTB were conducted in medical settings (i.e. hospital and clinic) with small samples and high rates of attrition.<sup>(7, 9, 10)</sup> Notably, most of the previous studies analyzed anxiety or depression without considering that they may occur in a comorbid state.<sup>(7-11)</sup> Comorbid anxiety and depression is, in fact, common (affecting up to 50% of women with anxiety or depression) and is more likely to involve severe symptoms of anxiety and depression than isolated anxiety or depression.<sup>(12-14)</sup> Thus, comorbid anxiety and depression may pose a higher risk of PTB than isolated anxiety or depression, which may influence the association between anxiety or depression and PTB.

Anxiety and depression are negatively correlated with neighborhood SES.<sup>(15)</sup> Neighborhood SES is an area-level measure of SES, which aggregates individual SES (such as

1  
2  
3 income, education, and employment status) at a certain geographical level.(16) Neighborhood  
4  
5 SES may influence the risk of PTB by exposing women to health benefitting or risk elevating  
6  
7 factors, such as access to healthy foods, quality health services, opportunities for leisure activity,  
8  
9 and social support and exposure to societal stressors, crimes, and poor air and water quality.(16-  
10  
11 19) Low neighborhood SES may affect an individual's ability to fulfill daily needs, access  
12  
13 resources, make lifestyle choices, and cope with different situations.(16-19) Thus, the risk of  
14  
15 PTB that is associated with anxiety and/or depression during pregnancy may differ by  
16  
17 neighborhood SES. To our knowledge, this has not been examined.  
18  
19  
20

21  
22 This study examined the association of the presence of anxiety symptoms alone,  
23  
24 depression symptoms alone, and both anxiety and depression symptoms with PTB. This study  
25  
26 further examined whether the presence of anxiety, depression, and both anxiety and depression  
27  
28 interact with neighborhood SES to increase the risk of PTB. This may help to determine the  
29  
30 subgroups of women who are at increased risk for PTB.  
31  
32  
33  
34

## 35 **METHODS**

### 36 **Data sources**

37  
38  
39  
40 This study combined datasets from two community-based prospective pregnancy cohort  
41  
42 studies in Alberta, Canada (n=5,528). The All Our Families (AOF) cohort study recruited 3,341  
43  
44 pregnant women and the Alberta Pregnancy Outcomes and Nutrition (APrON) cohort study  
45  
46 recruited 2,187 pregnant women, with 231 women participating in both studies. The description  
47  
48 and comparability of these two cohort studies is available elsewhere,(20, 21) and justifies  
49  
50 combining these data sources.(22) The AOF study aimed to examine maternal well-being and  
51  
52 infant outcomes and the APrON study aimed to investigate the role of prenatal maternal nutrition  
53  
54  
55  
56  
57  
58  
59  
60

1  
2  
3 on maternal mental health and infant outcomes.(20, 21) Briefly, each cohort study had similar  
4 inclusion criteria, sampling design (community-based, non-stratified sampling), and data  
5 collection methods.(21) Both studies recruited pregnancy cohorts between 2008 and 2012 from  
6 maternity clinics, high schools, public places, etc. and followed them up. The follow-up for  
7 mother and child dyad is still ongoing in both studies.(21)  
8  
9  
10  
11  
12  
13

14 We obtained two de-identified cohort datasets linked with neighborhood SES data from  
15 SAGE (Secondary Analysis to Generate Evidence), the secure data repository developed by  
16 PolicyWise for Children & Families, which houses these datasets. Ethics approval for this study  
17 was obtained from the Conjoint Health Research Ethics Board at the University of Calgary.  
18  
19  
20  
21  
22  
23

#### 24 **Patient and public involvement**

25  
26 This study used de-identified secondary data. Patient and public were not involved in the  
27 design or planning of the study.  
28  
29

#### 30 **Variables**

31  
32 Variables that were deemed similar in the two studies were harmonized and appended  
33 into a single new dataset. Women who participated in both studies (n=231) were counted only  
34 once. Data on age, ethnicity (white includes all Caucasians and non-white includes all non-  
35 Caucasians), maternal SES, parity, BMI, smoking status, social support, depression, and anxiety  
36 were collected at <27 weeks of gestation (in the APrON study) and at <25 weeks of gestation (in  
37 the AOF study). BMI was calculated based on the self-reported pre-pregnancy height and weight  
38 (i.e., immediately before pregnancy). Additionally, depression and anxiety were measured during  
39 the third trimester (APrON: 27-42 weeks of gestation; AOF: 34-36 weeks of gestation).(20, 21)  
40  
41  
42  
43  
44  
45  
46  
47  
48  
49  
50

51 Both cohorts used an identical measure of depression, i.e., the Edinburgh Depression  
52 Scale (EPDS). The EPDS is a 10-item self-reported scale with each item ranging from 0 to 3 to  
53  
54  
55  
56  
57  
58  
59

1  
2  
3 assess symptoms of current depression (i.e. how women have felt in the past 7 days).(23) The  
4  
5 EPDS has high internal consistency of 0.87,(23) a sensitivity of 78%, and specificity of 99% in  
6  
7 the obstetric population,(24, 25) and is the most common scale used to measure antenatal and  
8  
9 postnatal depression.(26) The recommended standard cut-off score of  $\geq 13$  out of 30 points on the  
10  
11 EPDS was used to define the presence of clinically significant depression during pregnancy.(27)  
12  
13 While the EPDS was specifically designed to assess depression, three items (namely items 3, 4,  
14  
15 and 5) comprising the anxiety subscale (EDPS-3A) have been suggested as a measure of anxiety  
16  
17 by previous studies,(28, 29) with a sensitivity of 66.7% and specificity of 88.2% in the obstetric  
18  
19 population.(29)The standard cut-off of  $\geq 6$  out of a maximum of 9 is used to define the presence  
20  
21 of clinically significant anxiety during pregnancy.(29) The cohort studies used different  
22  
23 measures of anxiety: the AOF study used the State-Trait Anxiety Inventory and the APrON study  
24  
25 used the Symptoms Checklist 90. Thus, the EDPS-3A was chosen as a measure of anxiety to  
26  
27 have a consistent measure across studies and to avoid the introduction of misclassification bias  
28  
29 related to the use of different tools. Presence of isolated anxiety or depression was defined as  
30  
31 meeting the anxiety or depression definition during pregnancy. Presence of both anxiety and  
32  
33 depression was defined as meeting both anxiety and depression definitions at the same time point  
34  
35 in pregnancy. Births that occurred before 37 weeks of gestation were defined as PTB (both  
36  
37 spontaneous and iatrogenic included). PTB was measured at 4 months of postpartum period  
38  
39 based on maternal recall of week of gestation at delivery.  
40  
41  
42  
43  
44  
45

46  
47 Neighborhood SES data were measured by the Pampalon material deprivation index  
48  
49 (derived from the 2011 Statistics Canada census)(30, 31) which was aggregated at the  
50  
51 dissemination area (DA) level. DA is the smallest geographical unit available in the Canadian  
52  
53 census, consisting of 400-700 persons.(32) The Pampalon material deprivation index is a  
54  
55  
56  
57  
58  
59

1  
2  
3 composite measure of neighborhood SES that combines the proportion of persons without high  
4 school diplomas, the average personal income, and the rate of unemployment within the DA. It is  
5 used as a deprivation quintile, with quintile 1 representing the least deprived and quintile 5  
6 representing the most deprived neighborhoods.(30) Neighborhood SES was assigned to each  
7 cohort based on their postal code of residence at the time of cohort recruitment.  
8  
9  
10  
11  
12  
13

### 14 **Data Analysis**

15  
16  
17 First, variables significantly associated with PTB as well as anxiety and/or depression  
18 (“anxiety only,” “depression only,” and “both anxiety and depression”) were identified using  
19 bivariate analysis ( $p < 0.05$ ). The significantly associated variables were parity, ethnicity, and  
20 body mass index. Then, a multivariable logistic regression model was constructed to examine the  
21 association between anxiety and/or depression and PTB, adjusting for parity, ethnicity, and body  
22 mass index. Smoking, social support, and maternal education and household income variables  
23 were also initially selected based on literature to include in the multivariable model, considering  
24 that they may change or confound the association between anxiety/depression and PTB in the  
25 multivariable model. However, these variables did not change or confound the association in the  
26 multivariable model and were thus dropped from the model.  
27  
28  
29  
30  
31  
32  
33  
34  
35  
36  
37  
38  
39

40 A multilevel multivariable logistic regression model, which assumes the lack of  
41 independence of observations and accounts for the variation between groups or areas, was then  
42 constructed to examine the effect modification of neighborhood SES on the association between  
43 anxiety and/or depression and PTB. This model included interaction terms in addition to parity,  
44 ethnicity, and body mass index. The interaction terms comprised “anxiety only,” “depression  
45 only,” and “both anxiety and depression” combined with each quintile of deprivation indices.  
46  
47  
48  
49  
50  
51  
52  
53  
54 Deprivation quintile 4<sup>th</sup> and 5<sup>th</sup> were combined as there were few or no cases in some strata.  
55  
56  
57  
58  
59  
60

1  
2  
3 The presence of significant interactions was identified through the p-values associated with beta  
4 coefficients of each interaction term. Subsequently, we constructed another model without the  
5 interaction terms. A likelihood ratio test was used to compare the goodness of model fit between  
6 those two nested models – with and without the interaction terms. Adjusted prediction of PTB  
7 (i.e., predicted probability of PTB that was evaluated at the average value of covariates, parity,  
8 ethnicity, and body mass index, across observations) was estimated using the model with  
9 interaction terms. Alpha ( $\alpha$ ) of  $<0.05$  was used to determine statistical significance. All analyses  
10 were performed using STATA/IC 14.1.  
11  
12  
13  
14  
15  
16  
17  
18  
19  
20

### 21 **Missing Data**

22  
23  
24 The proportion of missing data for gestational age at delivery (PTB) was 7.5%, for  
25 neighborhood deprivation indices was 7.8%, and for body mass index was 6.8%. Other variables  
26 had missing data  $<5\%$ , ranging from 1.3% for depression to 4.4% for household total income.  
27 The missing data for these variables occurred due to maternal non-response. Characteristics of  
28 groups of women (such as ethnicity, parity, BMI, neighborhood SES, anxiety and depression)  
29 with and without missing data on PTB were compared to assess differences. Multiple imputation  
30 was used to address with missing data on the three variables (i.e., PTB, body mass index, and  
31 neighborhood deprivation indices) that had  $\geq 5\%$  missing data. (33) Using STATA's "mi  
32 Package", the multiple imputation process was carried out in three steps as recommended by  
33 Rubin: imputation, analysis, and combination. (33, 34) The method assumes that the missing data  
34 are missing at random and attempts to estimate a missing value within a plausible set of  
35 values. (33, 34) The imputation values (i.e., a predictive distribution based on observed data)  
36 were estimated using an imputation model (with imputation 50 times). (33, 34) The imputation  
37 model included the variables that were significant with missing data (i.e., marital status, duration  
38  
39  
40  
41  
42  
43  
44  
45  
46  
47  
48  
49  
50  
51  
52  
53  
54  
55  
56  
57  
58  
59  
60

1  
2  
3 of stay in Canada, maternal education, and household total income, intended pregnancy,  
4 smoking, alcohol consumption) as well as those that were utilized in the analysis model (i.e.,  
5  
6 PTB, ethnicity, parity, BMI, neighborhood SES, anxiety and depression, and interaction terms).  
7  
8 Sensitivity analysis was done to compare the estimates from the analyses based on multiple  
9  
10 imputation and from the analysis restricted to complete case.  
11  
12  
13  
14  
15  
16

## 17 RESULTS

18  
19 Of total 5,297 pregnant women, 17.9% of women had anxiety and/or depression: 7.7% of  
20  
21 women had both anxiety and depression, followed by 6.0% women had anxiety alone, and 4.2%  
22  
23 women had depression alone. Women with both anxiety and depression had a higher rate of PTB  
24  
25 (10.6%) compared to those with isolated anxiety (6.5%) or isolated depression (8.2%) or without  
26  
27 anxiety and depression (6.9%). A higher proportion of women with a presence of both anxiety  
28  
29 and depression (compared to those with anxiety or depression alone) were single, non-white,  
30  
31 recent immigrants, had a low household income, and were from the most deprived  
32  
33 neighborhoods ( $p<0.05$ ) (Table 1). Mean scores of anxiety (mean=6.6, standard deviation  
34  
35 (SD)=0.4) and depression (mean=16.2, SD=0.13) were higher among women with both  
36  
37 conditions compared to those with anxiety alone (mean=6.1, SD=0.2) or depression alone  
38  
39 (mean=14.6, SD=0.12). As shown in Table 2, women who delivered preterm infants were more  
40  
41 likely to be non-white, obese, primiparous, and from the most deprived neighborhoods. Maternal  
42  
43 ethnicity, parity, BMI, neighborhood SES, anxiety, and depression were significantly associated  
44  
45 with the presence of missing data on PTB.  
46  
47  
48  
49

50  
51 The presence of both anxiety and depression (adjusted odds ratio (aOR)=1.6, 95%  
52  
53 CI=1.1, 2.3), but neither anxiety alone (aOR=0.8, 95% CI=0.5, 1.4) nor depression alone  
54  
55  
56  
57  
58  
59

1  
2  
3 (aOR=1.3, 95% CI=0.8, 2.3), was significantly associated with PTB (Table 3). Effect  
4  
5 modification was observed between the presence of both anxiety and depression and  
6  
7 neighborhood SES (p-value=0.004). Compared to women without anxiety and depression,  
8  
9 women with both anxiety and depression who lived in quintile 3 and more deprived  
10  
11 neighborhoods had significantly increased odds of experiencing a preterm delivery (quintile 4  
12  
13 and 5: aOR=2.2, 95% CI=1.3, 3.9). In contrast, compared to women without anxiety and  
14  
15 depression, women with both anxiety and depression who lived in the least deprived  
16  
17 neighborhood were not at elevated odds of experiencing a preterm delivery (aOR=0.2, 95 %  
18  
19 CI=0.1, 1.5) (Table 3). The OR estimates from the analyses based on multiple imputation and  
20  
21 from the analysis restricted to complete cases were similar, with some confidence intervals being  
22  
23 slightly narrower in the multiple imputation analysis.  
24  
25  
26  
27

28  
29 As shown in Table 4, the predicted probability of PTB for women with a presence of both  
30  
31 anxiety and depression was 10.0% (95% CI=6.8, 13.1). It increased to 15.7% (95% CI=9.5, 22.6)  
32  
33 if they lived in the most deprived neighborhoods – an increase of 57.1% – and it decreased to  
34  
35 1.4% (95% CI=0.1, 4.2) if they lived in the least deprived neighborhoods. The predicted  
36  
37 probability of PTB for women with depression alone was 9.6% (95% CI=5.2, 14.1), which  
38  
39 increased to 14.0% (95% CI=2.7, 25.3) if they lived in the most deprived neighborhoods. The  
40  
41 predicted probability for women with anxiety alone and women with absence of anxiety and  
42  
43 depression remained similar across the neighborhood deprivation indices.  
44  
45  
46  
47  
48

## 49 **DISCUSSION**

### 50 **Main findings**



1  
2  
3 This study examined the association of anxiety alone, depression alone, and the presence  
4 of both anxiety and depression during pregnancy with PTB, using data from two community-  
5 based pregnancy cohort studies in Alberta, Canada. The study found an association between the  
6 presence of both anxiety and depression and PTB, which significantly differed according to  
7 neighborhood SES. Women with both anxiety and depression were more likely to deliver  
8 preterm infants if they lived in a relatively more deprived neighborhood compared to if they  
9 lived in a less deprived neighborhood. For women with both anxiety and depression, the absolute  
10 predicted probability of delivering preterm infants was 16% if these women lived in the most  
11 deprived neighborhood and it was 1% if they lived in the least deprived neighborhood. Overall,  
12 the findings suggest the importance of neighborhoods on maternal health (in general) and more  
13 specifically preterm birth.  
14  
15  
16  
17  
18  
19  
20  
21  
22  
23  
24  
25  
26  
27

### 28 **Interpretation**

29  
30 Although few previous studies assessed the association between the presence of both  
31 anxiety and depression during pregnancy and PTB, our finding is consistent with their findings  
32 that the presence of both anxiety and depression increases the likelihood of PTB.(14, 35, 36)  
33 This may be related to the additive effects of prenatal depression and anxiety and the effects of  
34 severity of anxiety and depressive symptoms. Previous studies conducted in the general  
35 population and in pregnant women found a higher score of anxiety or depression symptoms  
36 among those with both anxiety and depression than those with isolated anxiety or depression.(36,  
37 37). It is also reported in previous studies that individuals with both anxiety and depression have  
38 longer depressive episodes, worse psychosocial impairment, poorer response to medication,  
39 compromised quality of life, and increased suicidality than those with isolated anxiety or  
40 depression.(12, 35, 37) Thus, the presence of both anxiety and depression during pregnancy may  
41  
42  
43  
44  
45  
46  
47  
48  
49  
50  
51  
52  
53  
54  
55  
56  
57  
58  
59  
60

1  
2  
3 lead to an increased risk of poor birth outcomes, including PTB, relative to depression or anxiety  
4  
5 alone.  
6

7  
8 Our study did not find an association between anxiety alone or depression alone and  
9  
10 PTB, which is consistent with a previous pregnancy cohort study that analyzed isolated anxiety  
11  
12 or depression separately from the presence of both or comorbid anxiety and depression.(36)  
13  
14 However, the finding is inconsistent with several previous studies that analyzed anxiety or  
15  
16 depression intermixing with the presence of both conditions.(8, 10) It is possible that the  
17  
18 association described in the literature requires high levels of anxiety or depression, which is  
19  
20 more likely present in the presence of both anxiety and depression symptoms or disorders. Thus,  
21  
22 the associations found in previous studies may have been confounded by the presence of both  
23  
24 anxiety and depression symptoms or comorbid anxiety and depression disorders. The increased  
25  
26 risk of PTB associated with the presence of both anxiety and depression (but not with isolated  
27  
28 anxiety or depression) may, in part, explain the inconsistencies across previous findings on the  
29  
30 association between prenatal anxiety or depression and PTB. Similarly, previous studies did not  
31  
32 analyze the association stratified by neighborhood SES, meaning that these studies averaged the  
33  
34 association across neighborhood SES, which may also explain the inconsistencies across  
35  
36 previous studies findings.  
37  
38  
39  
40  
41

42 A strong association between the presence of both anxiety and depression and PTB  
43  
44 among women living in a relatively more deprived neighborhood may reflect that, besides  
45  
46 individual level risk factors, PTB is related to neighborhood factors.(16-18) For example, women  
47  
48 living in deprived neighborhoods often have less access to healthy foods, quality health services,  
49  
50 and opportunities for leisure activity, and have more exposure to societal stressors and  
51  
52 crimes.(16-19) Anxious and depressed women living in less advantaged areas may interpret the  
53  
54  
55  
56  
57  
58  
59  
60

1  
2  
3 deprivation associated stressors more acutely and have less support or are less able to manage or  
4 cope with their stressors, making them severely emotionally distressed compared to those living  
5 in more advantaged areas.(8, 11, 38, 39) Consequently, the elevated risk of delivering preterm is  
6 more likely to occur in this group of women. However, it is important to note that, the  
7 relationship between mental illness and impoverishment is difficult to interpret as causal, given  
8 the bi-directional relationship between them. Furthermore, in our study, the group of women  
9 with both anxiety and depression (who often have severe symptoms of anxiety or depression) in  
10 the least deprived neighborhoods had an exceptionally low rate of PTB. The observed  
11 association between the presence of both anxiety and depression and PTB among women living  
12 in a relatively more deprived neighborhood seems to depend on this result. Thus, the replication  
13 of this finding seems important.

### 24 **Strengths and limitations**

25  
26 To our knowledge, few studies have directly examined the presence of both depressive  
27 and anxious symptoms versus isolated depressive or anxious symptoms as risk factors of PTB,  
28 and no studies have examined neighborhood SES as a modifier to the relationship between  
29 anxiety and/or depression and PTB. This study is important given its focus on the commonest  
30 psychological condition (i.e., comorbid anxiety and depression) and the importance of  
31 identification of specific groups of women who may benefit the most from the preventive  
32 interventions. This study used two community-based prospective pregnancy cohort studies. This  
33 provided an opportunity to describe PTB across the several strata of anxiety, depression, and  
34 both anxiety and depression and neighborhood SES in a relatively representative sample  
35 (compared, for example, to a hospital- or clinic-based sample) of pregnant women. However,  
36 even using the two cohorts, some strata had few cases of preterm infants, which may have led to  
37  
38  
39  
40  
41  
42  
43  
44  
45  
46  
47  
48  
49  
50  
51  
52  
53  
54  
55  
56  
57  
58  
59  
60

1  
2  
3 the observed imprecise and/or insignificant estimates (specifically in a group with depression  
4 alone). As these cohorts over-represent women with high SES,(21, 40, 41) it limits the  
5  
6 generalizability of the findings to other demographic groups. While the use of prospective  
7  
8 measurement of depression and anxiety reduces the chance of misclassifications due to recall  
9  
10 bias, the use of self-reported anxiety and depression measurement scales may have introduced  
11  
12 measurement inaccuracy. Specifically, the EPDS-3A scale has not been validated in a pregnant  
13  
14 population and it tends to provide high false-positive results based on its validation on during the  
15  
16 postpartum period.(28, 29) Furthermore, the EPDS-3A is a subscale of the EPDS. The standard  
17  
18 cut-off point for the EPDS excluding the items of the EPDS-3A has not been established. While  
19  
20 the use of a single scale may overestimate the presence of anxiety and/or depression, being able  
21  
22 to identify combined anxiety and depression group using a single scale is advantageous as it  
23  
24 facilitates for intervention design. While we examined the association between anxiety and/or  
25  
26 depression and PTB analyzing the influence of several potential confounders, other confounders  
27  
28 such as antidepressant use, other psychiatric conditions, and medical risk factors that may  
29  
30 influence the associations were not considered since they were not available in the study's data  
31  
32 sources. Similarly, we were not able to separate out spontaneous and iatrogenic PTB in the  
33  
34 model – the association might be stronger for spontaneous PTB. Overall, replication of this study  
35  
36 addressing these limitations may further the understanding on risk factors and preventive  
37  
38 strategies of PTB.  
39  
40  
41  
42  
43  
44  
45

46 We defined neighborhoods using the smallest area (i.e., dissemination area) where people  
47  
48 living in the smallest area are more likely to be similar for the outcomes, used multilevel analysis  
49  
50 that accounts for area-level variation, and adjusted for individual level variables, an appropriate  
51  
52 analytical approach for multilevel data. However, it is difficult to interpret the influence of  
53  
54  
55  
56  
57  
58  
59  
60

1  
2  
3 neighborhood SES using area-based variables, where women living in the same area share the  
4 same value for the variable. Individuals who live in the same area may also experience different  
5 contextual influences from many other areal units, and the timing and duration in which  
6 individuals experienced these contextual influences is also uncertain.  
7  
8  
9  
10  
11

## 12 **Conclusions**

13  
14 Our study found that the presence of both prenatal anxiety and depression increases the  
15 likelihood of PTB and the effect of this combination is stronger for women living in low SES  
16 neighborhoods compared to women living in high SES neighborhoods. The finding may help to  
17 inform development of intervention strategies (such as timely screening and management of  
18 anxiety and depression) that focus on the most deprived neighborhood. Furthermore, future  
19 research that examines the influence of severity of anxiety and depression on risk of PTB may  
20 further the understanding on risk factors and preventive strategies of PTB.  
21  
22  
23  
24  
25  
26  
27  
28  
29  
30  
31  
32  
33  
34  
35  
36  
37  
38  
39  
40  
41  
42  
43  
44  
45  
46  
47  
48  
49  
50  
51  
52  
53  
54  
55  
56  
57  
58  
59  
60

### **Authors contributions**

Kamala Adhikari involved in the conception and design of the study. Kamala is also responsible for conducting the analysis, interpreting the data, and drafting the manuscript. Amy Metcalfe provided overall supervision to Kamala in conducting this study and contributed to conception and study design, interpretation of data, provided intellectual content and revisions to manuscript. Scott Patten, Tyler Williamson, Alka B Patel, Shahirose Premji, Suzanne Tough, Nicole Letourneau, and Gerald Giesbrecht were involved in the conception and design of the study and provided interpretation and intellectual content to subsequent drafts of the manuscript. All authors read and approved the final draft.

### **Acknowledgements**

Kamala Adhikari was awarded the Vanier Canada Graduate Scholarship and the Alberta Innovates Graduate Studentship Award. Amy Metcalfe is supported by a Canadian Institutes of Health Research New Investigator Award. We acknowledge the All Our Families and the Alberta Pregnancy Outcomes and Nutrition cohort study teams for providing permission to use their data. We acknowledge SAGE (Secondary Analysis to Generate Evidence), the secure data repository developed by PolicyWise for Children and Families, which houses these datasets, for providing access to these datasets.

### **Role of funding agency**

Kamala Adhikari was awarded the Vanier Canada Graduate Scholarship (Award code: 201611CGV-382013-267341) by the Canadian Institutes of Health Research and the Alberta Innovates Graduate Studentship Award (Award code: 201611CGV-382013-267341) by the

1  
2  
3 Alberta Innovates to conduct this study. The funding agencies have no role in study design, data  
4 access, analysis, and interpretation, manuscript writing, and in the decision to submit the article  
5 for publication.  
6  
7  
8  
9

### 10 11 12 **Data sharing**

13  
14 Additional data such as statistical codes, supplementary tables, and technical appendix are  
15 available upon request (by emailing Kamala Adhikari: kamala.adhikaridahal@ucalgary.ca)  
16  
17  
18  
19

### 20 21 22 **Ethical statements**

23  
24 Ethics approval for this study was obtained from the Conjoint Health Research Ethics Board at  
25 the University of Calgary (REB16-2548\_REN1). This study used secondary data and all the data  
26 were anonymized; therefore, did not require informed consent.  
27  
28  
29

### 30 31 32 33 **Competing interests**

34  
35 The authors declare that they have no competing interests.  
36  
37  
38  
39  
40  
41  
42  
43  
44  
45  
46  
47  
48  
49  
50  
51  
52  
53  
54  
55  
56  
57  
58  
59  
60

## References

1. Blencowe H, Cousens S, Oestergaard MZ, Chou D, Moller AB, Narwal R, et al. National, regional, and worldwide estimates of preterm birth rates in the year 2010 with time trends since 1990 for selected countries: a systematic analysis and implications. *Lancet*. 2012;379(9832):2162-72.
2. Liu L, Johnson HL, Cousens S, Perin J, Scott S, Lawn JE, et al. Global, regional, and national causes of child mortality: an updated systematic analysis for 2010 with time trends since 2000. *Lancet*. 2012;379(9832):2151-61.
3. Johnston KM, Gooch K, Korol E, Vo P, Eyawo O, Bradt P, et al. The economic burden of prematurity in Canada. *BMC Pediatr*. 2014;14:93.
4. Blencowe H, Cousens S, Chou D, Oestergaard M, Say L, Moller AB, et al. Born too soon: the global epidemiology of 15 million preterm births. *Reprod Health*. 2013;10 Suppl 1:S2.
5. Ward RM, Beachy JC. Neonatal complications following preterm birth. *Bjog*. 2003;110 Suppl 20:8-16.
6. Canadian Institute for Health Information (CIHI). CIHI Snapshot: Inpatient Hospitalizations, Surgeries, Newborns and Childbirth Indicators. Accessed from: [www.cihi.ca/free\\_products/cad\\_hospitalization\\_and\\_childbirth\\_snapshot\\_2015-2016\\_en.pdf](http://www.cihi.ca/free_products/cad_hospitalization_and_childbirth_snapshot_2015-2016_en.pdf).
7. Ding XX, Wu YL, Xu SJ, Zhu RP, Jia XM, Zhang SF, et al. Maternal anxiety during pregnancy and adverse birth outcomes: a systematic review and meta-analysis of prospective cohort studies. *J Affect Disord*. 2014;159:103-10.
8. Grote NK, Bridge JA, Gavin AR, Melville JL, Iyengar S, Katon WJ. A meta-analysis of depression during pregnancy and the risk of preterm birth, low birth weight, and intrauterine growth restriction. *Arch Gen Psychiatry*. 2010;67(10):1012-24.



- 1  
2  
3 9. Staneva A, Bogossian F, Pritchard M, Wittkowski A. The effects of maternal depression,  
4 anxiety, and perceived stress during pregnancy on preterm birth: A systematic review. *Women*  
5  
6 *Birth*. 2015;28(3):179-93.  
7
- 8  
9  
10 10. Rose MS, Pana G, Premji S. Prenatal Maternal Anxiety as a Risk Factor for Preterm Birth  
11 and the Effects of Heterogeneity on This Relationship: A Systematic Review and Meta-Analysis.  
12  
13 *Biomed Res Int*. 2016;2016:8312158.  
14
- 15  
16  
17 11. Alder J, Fink N, Bitzer J, Hosli I, Holzgreve W. Depression and anxiety during  
18 pregnancy: a risk factor for obstetric, fetal and neonatal outcome? A critical review of the  
19  
20 literature. *J Matern Fetal Neonatal Med*. 2007;20(3):189-209.  
21
- 22  
23  
24 12. Misri S, Swift E. Generalized Anxiety Disorder and Major Depressive Disorder in  
25 Pregnant and Postpartum Women: Maternal Quality of Life and Treatment Outcomes. *J Obstet*  
26  
27 *Gynaecol Can*. 2015;37(9):798-803.  
28
- 29  
30  
31 13. Wenzel A, Haugen EN, Jackson LC, Brendle JR. Anxiety symptoms and disorders at  
32 eight weeks postpartum. *J Anxiety Disord*. 2005;19(3):295-311.  
33
- 34  
35  
36 14. Field T, Diego M, Hernandez-Reif M, Figueiredo B, Deeds O, Ascencio A, et al.  
37 Comorbid depression and anxiety effects on pregnancy and neonatal outcome. *Infant Behav Dev*.  
38  
39 2010;33(1):23-9.  
40
- 41  
42  
43 15. Yang S, Kestens Y, Dahhou M, Daniel M, Kramer MS. Neighborhood deprivation and  
44 maternal psychological distress during pregnancy: a multilevel analysis. *Matern Child Health J*.  
45  
46 2015;19(5):1142-51.  
47
- 48  
49  
50 16. Kawachi I and Berkman LF. *Neighborhood and Health*. New York: Oxford  
51  
52 University Press Inc.; 2003.  
53  
54  
55  
56  
57  
58  
59  
60

- 1  
2  
3 17. Diez Roux AV, Mair C. Neighborhoods and health. *Ann N Y Acad Sci.* 2010;1186:125-  
4  
5 45.  
6
- 7  
8 18. Lynch JW, Kaplan GA. Socioeconomic Factors. In: Karachi I and Berkman LF, *Social*  
9  
10 *Epidemiology.* editor. New York: Oxford University Press; 2000.  
11
- 12 19. Dunkel Schetter C. Psychological science on pregnancy: stress processes,  
13  
14 biopsychosocial models, and emerging research issues. *Annu Rev Psychol.* 2011;62:531-58.  
15
- 16 20. Kaplan BJ, Giesbrecht GF, Leung BM, Field CJ, Dewey D, Bell RC, et al. The Alberta  
17  
18 *Pregnancy Outcomes and Nutrition (APrON) cohort study: rationale and methods. Matern Child*  
19  
20 *Nutr.* 2014;10(1):44-60.  
21
- 22 21. Leung BM, McDonald SW, Kaplan BJ, Giesbrecht GF, Tough SC. Comparison of  
23  
24 sample characteristics in two pregnancy cohorts: community-based versus population-based  
25  
26 recruitment methods. *BMC Med Res Methodol.* 2013;13:149.  
27  
28
- 29 22. Roberts GBD. Analyses Based on Combining Similar Information from  
30  
31 *Multiple Surveys. Section on Survey Research Methods Joint Statistical Meetings (JSM); 2009.*  
32  
33 p. 2138-47.  
34  
35
- 36 23. Cox JL, Holden JM, Sagovsky R. Detection of postnatal depression. Development of the  
37  
38 10-item Edinburgh Postnatal Depression Scale. *Br J Psychiatry.* 1987;150:782-6.  
39  
40
- 41 24. Rubertsson C, Borjesson K, Berglund A, Josefsson A, Sydsjo G. The Swedish validation  
42  
43 of Edinburgh Postnatal Depression Scale (EPDS) during pregnancy. *Nord J Psychiatry.*  
44  
45 2011;65(6):414-8.  
46  
47
- 48 25. Beck CT, Gable RK. Comparative analysis of the performance of the Postpartum  
49  
50 *Depression Screening Scale with two other depression instruments. Nurs Res.* 2001;50(4):242-  
51  
52 50.  
53  
54  
55  
56  
57  
58  
59  
60

- 1  
2  
3 26. Boyd RC, Le HN, Somberg R. Review of screening instruments for postpartum  
4 depression. *Arch Womens Ment Health*. 2005;8(3):141-53.  
5  
6
- 7 27. Gaynes BN, Gavin N, Meltzer-Brody S, Lohr KN, Swinson T, Gartlehner G, et al.  
8 Perinatal depression: prevalence, screening accuracy, and screening outcomes. *Evid Rep Technol*  
9  
10 *Assess (Summ)*. 2005(119):1-8.  
11  
12
- 13 28. Matthey S, Fisher J, Rowe H. Using the Edinburgh postnatal depression scale to screen  
14 for anxiety disorders: conceptual and methodological considerations. *J Affect Disord*.  
15  
16 2013;146(2):224-30.  
17  
18
- 19 29. Matthey S. Using the Edinburgh Postnatal Depression Scale to screen for anxiety  
20 disorders. *Depress Anxiety*. 2008;25(11):926-31.  
21  
22
- 23 30. Pampalon R, Raymond G. A deprivation index for health and welfare planning in  
24 Quebec. *Chronic Dis Can*. 2000;21(3):104-13.  
25  
26
- 27 31. Alberta Health Services. How to use the Pampalon Deprivation Index in Alberta:  
28 Research and Innovation, Alberta Health Services; 2016.  
29  
30
- 31 32. Canadian Institute for Health Information (CIHI). Reducing gaps in Health: A focus on  
32 socioeconomic status in Urban Canada. Ottawa, Ont.: CIHI; 2008.  
33  
34
- 35 33. StataCorp. Stata manual release 13. Statistical software. A Stata Press Publication  
36  
37 StataCorp LP College Station, Texas, 2013.  
38  
39
- 40 34. Sterne JA, White IR, Carlin JB, Spratt M, Royston P, Kenward MG, et al. Multiple  
41 imputation for missing data in epidemiological and clinical research: potential and pitfalls. *Bmj*.  
42  
43 2009;338:b2393.  
44  
45
- 46 35. Flynn HA, McBride N, Cely A, Wang Y, DeCesare J. Relationship of prenatal depression  
47 and comorbidities to infant outcomes. *CNS Spectr*. 2015;20(1):20-8.  
48  
49  
50  
51  
52  
53  
54  
55  
56  
57  
58  
59  
60

- 1  
2  
3 36. Ibanez G, Charles MA, Forhan A, Magnin G, Thiebaugeorges O, Kaminski M, et al.  
4  
5 Depression and anxiety in women during pregnancy and neonatal outcome: data from the EDEN  
6  
7 mother-child cohort. *Early Hum Dev.* 2012;88(8):643-9.  
8  
9  
10 37. Pollack MH. Comorbid anxiety and depression. *J Clin Psychiatry.* 2005;66 Suppl 8:22-9.  
11  
12 38. Kessler RC. Stress, social status, and psychological distress. *J Health Soc Behav.*  
13  
14 1979;20(3):259-72.  
15  
16 39. Seguin L, Potvin L, St-Denis M, Loiselle J. Chronic stressors, social support, and  
17  
18 depression during pregnancy. *Obstet Gynecol.* 1995;85(4):583-9.  
19  
20  
21 40. McDonald SW, Lyon AW, Benzies KM, McNeil DA, Lye SJ, Dolan SM, et al. The All  
22  
23 Our Babies pregnancy cohort: design, methods, and participant characteristics. *BMC Pregnancy*  
24  
25 *Childbirth.* 2013;13 Suppl 1:S2.  
26  
27  
28 41. Gracie SK, Lyon AW, Kehler HL, Pennell CE, Dolan SM, McNeil DA, et al. All Our  
29  
30 Babies Cohort Study: recruitment of a cohort to predict women at risk of preterm birth through  
31  
32 the examination of gene expression profiles and the environment. *BMC Pregnancy Childbirth.*  
33  
34 2010;10:87.  
35  
36  
37  
38  
39  
40  
41  
42  
43  
44  
45  
46  
47  
48  
49  
50  
51  
52  
53  
54  
55  
56  
57  
58  
59  
60

**Table 1: Distribution of maternal characteristics across anxiety and depression status during pregnancy**

| Maternal characteristics                        | Overall<br>(n=5297) | Absence of both<br>anxiety and<br>depression<br>n=4294 (82.1%) | Presence of anxiety<br>only<br>n=312 (6.0%) | Presence of<br>depression<br>only<br>n=220 (4.2%) | Presence of both<br>anxiety and<br>depression<br>n=402 (7.7%) | $\chi^2$<br>p-value |
|-------------------------------------------------|---------------------|----------------------------------------------------------------|---------------------------------------------|---------------------------------------------------|---------------------------------------------------------------|---------------------|
|                                                 | n (%)               | n (%)                                                          | n (%)                                       | n (%)                                             | n (%)                                                         |                     |
| Maternal age                                    |                     |                                                                |                                             |                                                   |                                                               | 0.006               |
| <35 years                                       | 4117 (79.2)         | 3333 (79.0)                                                    | 261 (84.5)                                  | 156 (72.6)                                        | 315 (81.6)                                                    |                     |
| ≥35 years                                       | 1079 (20.8)         | 886 (21.0)                                                     | 48 (15.5)                                   | 59 (27.4)                                         | 71 (18.4)                                                     |                     |
| Marital status                                  |                     |                                                                |                                             |                                                   |                                                               | <0.0001             |
| Single/divorced/separated                       | 262 (5.1)           | 168 (3.9)                                                      | 22 (7.2)                                    | 25 (11.5)                                         | 47 (11.8)                                                     |                     |
| Married/common-law                              | 4916 (94.9)         | 4080 (96.1)                                                    | 284 (92.8)                                  | 193 (88.5)                                        | 351 (88.2)                                                    |                     |
| Ethnicity                                       |                     |                                                                |                                             |                                                   |                                                               | <0.0001             |
| Non-white                                       | 1087 (21.0)         | 807 (19.0)                                                     | 68 (22.2)                                   | 67 (30.9)                                         | 143 (36.1)                                                    |                     |
| White/Caucasian                                 | 4085 (79.0)         | 3437 (80.9)                                                    | 239 (77.9)                                  | 150 (69.1)                                        | 253 (63.9)                                                    |                     |
| Duration of stay in Canada                      |                     |                                                                |                                             |                                                   |                                                               | <0.0001             |
| Born/5 years+                                   | 473 (9.3)           | 3841 (91.6)                                                    | 275 (89.9)                                  | 185 (87.3)                                        | 329 (84.4)                                                    |                     |
| <5 years                                        | 4636 (90.7)         | 352 (8.4)                                                      | 31 (10.1)                                   | 27 (12.7)                                         | 61 (15.6)                                                     |                     |
| Body mass index                                 |                     |                                                                |                                             |                                                   |                                                               | 0.002               |
| Underweight (<18.5kg/m <sup>2</sup> )           | 214 (4.3)           | 170 (4.2)                                                      | 12 (4.1)                                    | 11 (5.3)                                          | 21 (5.6)                                                      |                     |
| Normal weight (18.5 - 24.99 kg/m <sup>2</sup> ) | 3084 (62.5)         | 2552 (63.2)                                                    | 172 (58.5)                                  | 125 (59.8)                                        | 220 (58.4)                                                    |                     |
| Overweight (25 - 29.99 kg/m <sup>2</sup> )      | 1066 (21.6)         | 882 (21.9)                                                     | 59 (20.1)                                   | 50 (23.9)                                         | 73 (19.4)                                                     |                     |
| Obesity (≥30 kg/m <sup>2</sup> )                | 574 (11.6)          | 432 (10.7)                                                     | 51 (17.4)                                   | 23 (11.0)                                         | 63 (16.7)                                                     |                     |
| Parity                                          |                     |                                                                |                                             |                                                   |                                                               | <0.0001             |
| Primiparous                                     | 2649 (51.3)         | 2135 (50.3)                                                    | 199 (64.6)                                  | 106 (48.8)                                        | 205 (51.9)                                                    |                     |
| Multiparous                                     | 2518 (48.7)         | 2106 (49.7)                                                    | 109 (35.4)                                  | 111 (51.2)                                        | 190 (48.1)                                                    |                     |
| Unintended pregnancy                            | 1011 (19.5)         | 742 (17.4)                                                     | 70 (22.6)                                   | 72 (32.9)                                         | 122 (30.7)                                                    | <0.0001             |
| Smoked before pregnancy                         | 1095 (21.1)         | 822 (19.3)                                                     | 86 (27.9)                                   | 61 (28.0)                                         | 123 (30.9)                                                    | <0.0001             |
| Alcohol consumption before pregnancy            | 4363 (84.1)         | 3603 (84.7)                                                    | 268 (87.0)                                  | 181 (82.7)                                        | 305 (76.6)                                                    | <0.0001             |
| Drug abuse before pregnancy                     | 750 (14.5)          | 561 (13.2)                                                     | 61 (19.9)                                   | 44 (20.4)                                         | 83 (20.8)                                                     | <0.0001             |

| Maternal characteristics                           | Overall<br>(n=5297) | Absence of both<br>anxiety and<br>depression<br>n=4294 (82.1%) | Presence of anxiety<br>only<br>n=312 (6.0%) | Presence of<br>depression<br>only<br>n=220 (4.2%) | Presence of both<br>anxiety and<br>depression<br>n=402 (7.7%) | $\chi^2$<br>p-value |
|----------------------------------------------------|---------------------|----------------------------------------------------------------|---------------------------------------------|---------------------------------------------------|---------------------------------------------------------------|---------------------|
|                                                    | n (%)               | n (%)                                                          | n (%)                                       | n (%)                                             | n (%)                                                         |                     |
| Maternal education                                 |                     |                                                                |                                             |                                                   |                                                               | <0.0001             |
| High school or less than high school               | 613 (11.9)          | 451 (10.6)                                                     | 49 (16.2)                                   | 42 (19.4)                                         | 68 (17.3)                                                     |                     |
| Some post-secondary                                | 859 (16.7)          | 669 (15.8)                                                     | 57 (18.9)                                   | 35 (16.2)                                         | 96 (24.4)                                                     |                     |
| Completed post-secondary                           | 3688 (71.5)         | 3121 (73.6)                                                    | 196 (64.9)                                  | 139 (64.4)                                        | 229 (58.3)                                                    |                     |
| Household income                                   | 477 (9.4)           |                                                                |                                             |                                                   |                                                               | <0.0001             |
| <\$40,000                                          | 723 (14.3)          | 325 (7.8)                                                      | 25 (8.4)                                    | 40 (18.6)                                         | 85 (22.0)                                                     |                     |
| \$40,000 - <\$70,000                               | 1204 (23.8)         | 542 (13.0)                                                     | 53 (17.8)                                   | 43 (20.0)                                         | 83 (21.5)                                                     |                     |
| \$70,000 - <\$100,000                              | 2659 (52.5)         | 989 (23.8)                                                     | 76 (25.5)                                   | 52 (24.2)                                         | 85 (22.0)                                                     |                     |
| ≥\$100,000                                         |                     | 2301(55.4)                                                     | 144 (48.3)                                  | 80 (37.2)                                         | 133 (34.5)                                                    |                     |
| Inadequate social support anytime during pregnancy | 1148 (22.1)         | 731 (17.1)                                                     | 77 (25.0)                                   | 127 (57.4)                                        | 210 (52.4)                                                    | <0.0001             |
| Neighborhood deprivation index                     |                     |                                                                |                                             |                                                   |                                                               | <0.0001             |
| Quintile 1 (least deprived)                        | 1323 (27.1)         | 1108 (27.7)                                                    | 68 (24.3)                                   | 51 (24.9)                                         | 80 (22.4)                                                     |                     |
| Quintile 2                                         | 1259 (25.8)         | 1045 (26.1)                                                    | 82 (29.3)                                   | 41 (20.0)                                         | 83 (23.2)                                                     |                     |
| Quintile 3                                         | 972 (19.9)          | 800 (20.0)                                                     | 64 (22.9)                                   | 39 (19.0)                                         | 65 (18.2)                                                     |                     |
| Quintile 4                                         | 736 (15.1)          | 618 (15.5)                                                     | 37 (13.2)                                   | 30 (14.6)                                         | 47 (13.1)                                                     |                     |
| Quintile 5 (most deprived)                         | 595 (12.2)          | 429 (10.7)                                                     | 29 (10.4)                                   | 44 (21.5)                                         | 83 (23.2)                                                     |                     |
| Preterm birth                                      | 356 (7.3)           | 276 (6.9)                                                      | 19 (6.5)                                    | 16 (8.2)                                          | 37 (10.6)                                                     | 0.068               |

Sample size between variables differs as missing values were deleted using variable wise or pair wise deletion approach

**Table 2: Distribution of maternal characteristics across preterm birth status**

|                                                    | Preterm birth<br>n (%) | Term birth<br>n (%) | $\chi^2$<br>p-value |
|----------------------------------------------------|------------------------|---------------------|---------------------|
| Maternal age                                       |                        |                     | 0.332               |
| <35yrs                                             | 269 (77.1)             | 3541 (79.3)         |                     |
| ≥35yrs                                             | 80 (22.9)              | 926 (20.7)          |                     |
| Marital status                                     |                        |                     | 0.657               |
| Single/divorced/separated                          | 17 (5.0)               | 198 (4.4)           |                     |
| Married/common-law                                 | 326 (95.0)             | 4260 (95.6)         |                     |
| Ethnicity                                          |                        |                     | 0.004               |
| White/Caucasian                                    | 253 (73.8)             | 3574 (80.3)         |                     |
| Others                                             | 90 (26.2)              | 878 (19.7)          |                     |
| Duration of stay in Canada                         |                        |                     | 0.061               |
| <5 years                                           | 39 (11.6)              | 380 (8.6)           |                     |
| Born/5 years+                                      | 296 (88.4)             | 4022 (91.4)         |                     |
| Body mass index                                    |                        |                     | 0.001               |
| Underweight (<18.5kg/m <sup>2</sup> )              | 12 (3.7)               | 180 (4.2)           |                     |
| Normal weight (18.5 - 24.99 kg/m <sup>2</sup> )    | 183 (56.3)             | 2694 (63.3)         |                     |
| Overweight (25 - 29.99 kg/m <sup>2</sup> )         | 72 (22.2)              | 924 (21.7)          |                     |
| Obesity (≥30 kg/m <sup>2</sup> )                   | 58 (17.9)              | 459 (10.8)          |                     |
| Parity                                             |                        |                     | 0.004               |
| Primiparous                                        | 201 (58.9)             | 2266 (50.9)         |                     |
| Multiparous                                        | 140 (41.1)             | 2184 (49.1)         |                     |
| Unintended pregnancy                               | 62 (18.0)              | 829 (18.6)          | 0.798               |
| Smoked before pregnancy                            | 85 (24.7)              | 913 (20.5)          | 0.062               |
| Alcohol consumption before pregnancy               | 295 (85.8)             | 3770 (84.5)         | 0.531               |
| Drug abuse before pregnancy                        | 54 (15.7)              | 643 (14.4)          | 0.519               |
| Maternal education                                 |                        |                     | 0.891               |
| High school or less than high school               | 40 (11.7)              | 487 (11.0)          |                     |
| Some post-secondary                                | 54 (15.8)              | 729 (16.4)          |                     |
| Completed post-secondary                           | 248 (72.5)             | 3227 (72.6)         |                     |
| Household income                                   |                        |                     | 0.436               |
| <\$40,000                                          | 34 (10.2)              | 360 (8.2)           |                     |
| \$40,000 - <\$70,000                               | 51 (15.2)              | 591 (13.5)          |                     |
| \$70,000 - <\$100,000                              | 74 (22.1)              | 1059 (24.2)         |                     |
| ≥\$100,000                                         | 176 (52.5)             | 2358 (54.0)         |                     |
| Inadequate social support anytime during pregnancy | 84 (24.2)              | 955 (21.4)          | 0.216               |
| Neighborhood deprivation index                     |                        |                     | 0.002               |
| Quintile 1 (least deprived)                        | 93 (26.1)              | 1176 (27.7)         |                     |
| Quintile 2                                         | 76 (21.4)              | 1119 (26.3)         |                     |
| Quintile 3                                         | 71 (19.9)              | 839 (19.8)          |                     |
| Quintile 4                                         | 52 (14.6)              | 639 (15.0)          |                     |
| Quintile 5 (most deprived)                         | 64 (18.0)              | 475 (11.2)          |                     |

Sample size between variables differs as missing values were deleted using variable wise or pair wise deletion approach

**Table 3: Association between anxiety and depression status during pregnancy and preterm birth<sup>a</sup>**

| Anxiety and depression status during pregnancy <sup>b</sup> | Overall OR (95%CI) | Stratified by neighborhood deprivation indices (quintile) |                       |                       |                                          |
|-------------------------------------------------------------|--------------------|-----------------------------------------------------------|-----------------------|-----------------------|------------------------------------------|
|                                                             |                    | Quintile 1 <sup>c</sup> OR (95%CI)                        | Quintile 2 OR (95%CI) | Quintile 3 OR (95%CI) | Quintile 4 and 5 <sup>d</sup> OR (95%CI) |
| Unadjusted:                                                 |                    |                                                           |                       |                       |                                          |
| Presence of anxiety only                                    | 0.9 (0.6, 1.5)     | 0.8 (0.3, 2.2)                                            | 0.8 (0.3, 2.2)        | 1.1 (0.4, 2.9)        | 1.3 (0.5, 2.9)                           |
| Presence of depression only                                 | 1.2 (0.7, 2.1)     | 0.6 (0.2, 2.1)                                            | 0.8 (0.2, 3.6)        | 1.9 (0.7, 4.2)        | 2.6 (0.9, 6.1)                           |
| Presence of both anxiety and depression                     | 1.6 (1.1, 2.3)     | 0.2 (0.1, 1.5)                                            | 1.3 (0.5, 3.1)        | 2.8 (1.3, 5.5)        | 2.5 (1.3, 3.7)                           |
| Adjusted for parity, ethnicity, and body mass index:        |                    |                                                           |                       |                       |                                          |
| Presence of anxiety only                                    | 0.8 (0.5, 1.4)     | 0.7 (0.2, 1.9)                                            | 0.7 (0.2, 2.1)        | 1.0 (0.4, 2.9)        | 1.0 (0.4, 2.6)                           |
| Presence of depression only                                 | 1.3 (0.8, 2.3)     | 0.7 (0.2, 2.4)                                            | 0.9 (0.2, 4.1)        | 1.7 (0.8, 4.7)        | 2.3 (0.9, 7.0)                           |
| Presence of both anxiety and depression                     | 1.6 (1.1, 2.3)     | 0.2 (0.1, 1.5)                                            | 1.4 (0.6, 3.3)        | 2.6 (1.2, 5.8)        | 2.2 (1.3, 3.9)                           |

<sup>a</sup>Estimates were from analyses based on multiple imputation; <sup>b</sup>Absence of both anxiety and depression as a reference group; <sup>c</sup>quintile 1: least deprived neighborhood; <sup>d</sup>quintile 5: most deprived neighborhood (quintile 4 and 5 were combined due to few or no cases in some strata); OR: odds ratio; CI: confidence interval



**Table 4: Predicted marginal prevalence of preterm birth<sup>a</sup>**

| Anxiety and depression status during pregnancy <sup>b</sup> | Overall % (95%CI) | Stratified by neighborhood deprivation indices (quintile) |                      |                      |                                         |
|-------------------------------------------------------------|-------------------|-----------------------------------------------------------|----------------------|----------------------|-----------------------------------------|
|                                                             |                   | Quintile 1 <sup>b</sup> % (95%CI)                         | Quintile 2 % (95%CI) | Quintile 3 % (95%CI) | Quintile 4 and 5 <sup>c</sup> % (95%CI) |
| Absence of both anxiety and depression                      | 7.1 (6.8, 13.1)   | 7.6 (5.6, 9.3)                                            | 6.4 (4.8, 7.9)       | 6.9 (5.1, 8.8)       | 7.6 (5.9, 9.3)                          |
| Presence of anxiety only                                    | 6.3 (3.3, 9.1)    | 5.4 (0.2, 10.7)                                           | 4.9 (0.3, 9.5)       | 6.5 (0.3, 12.7)      | 7.9 (1.3, 14.6)                         |
| Presence of depression only                                 | 9.6 (5.2, 14.1)   | 4.7 (0.5, 10.4)                                           | 5.7 (0.45, 13.4)     | 13.3 (3.4, 23.2)     | 14.0 (2.7, 25.3)                        |
| Presence of both anxiety and depression                     | 10.0 (6.8, 13.1)  | 1.4 (0.1, 4.2)                                            | 8.0 (1.9, 14.1)      | 15.9 (6.3, 25.6)     | 15.7 (9.5, 22.6)                        |

<sup>a</sup>Adjusted for parity, ethnicity, and body mass index; <sup>b</sup>quintile 1: least deprived neighborhood; <sup>c</sup>quintile 5: most deprived neighborhood (quintile 4 and 5 were combined due to few or no cases in some strata); OR: odds ratio; CI: confidence interval

**STROBE 2007 (v4) Statement—Checklist of items that should be included in reports of *cohort studies***

| Section/Topic                | Item # | Recommendation                                                                                                                                                                       | Reported on page # |
|------------------------------|--------|--------------------------------------------------------------------------------------------------------------------------------------------------------------------------------------|--------------------|
| <b>Title and abstract</b>    | 1      | (a) Indicate the study's design with a commonly used term in the title or the abstract                                                                                               | 1                  |
|                              |        | (b) Provide in the abstract an informative and balanced summary of what was done and what was found                                                                                  | 3, 4, and 5        |
| <b>Introduction</b>          |        |                                                                                                                                                                                      |                    |
| Background/rationale         | 2      | Explain the scientific background and rationale for the investigation being reported                                                                                                 | 6 and 7            |
| Objectives                   | 3      | State specific objectives, including any prespecified hypotheses                                                                                                                     | 7                  |
| <b>Methods</b>               |        |                                                                                                                                                                                      |                    |
| Study design                 | 4      | Present key elements of study design early in the paper                                                                                                                              | 7 and 8            |
| Setting                      | 5      | Describe the setting, locations, and relevant dates, including periods of recruitment, exposure, follow-up, and data collection                                                      | 7 and 8            |
| Participants                 | 6      | (a) Give the eligibility criteria, and the sources and methods of selection of participants. Describe methods of follow-up                                                           | 7                  |
|                              |        | (b) For matched studies, give matching criteria and number of exposed and unexposed                                                                                                  | Not applicable     |
| Variables                    | 7      | Clearly define all outcomes, exposures, predictors, potential confounders, and effect modifiers. Give diagnostic criteria, if applicable                                             | 8, 9, 10           |
| Data sources/<br>measurement | 8*     | For each variable of interest, give sources of data and details of methods of assessment (measurement). Describe comparability of assessment methods if there is more than one group | 8, 9, 10           |
| Bias                         | 9      | Describe any efforts to address potential sources of bias                                                                                                                            | 8, 9, 10           |
| Study size                   | 10     | Explain how the study size was arrived at                                                                                                                                            | Not applicable     |
| Quantitative variables       | 11     | Explain how quantitative variables were handled in the analyses. If applicable, describe which groupings were chosen and why                                                         | 9, 10              |
| Statistical methods          | 12     | (a) Describe all statistical methods, including those used to control for confounding                                                                                                | 9, 10              |
|                              |        | (b) Describe any methods used to examine subgroups and interactions                                                                                                                  | 9, 10              |
|                              |        | (c) Explain how missing data were addressed                                                                                                                                          | 11                 |
|                              |        | (d) If applicable, explain how loss to follow-up was addressed                                                                                                                       | Not applicable     |
|                              |        | (e) Describe any sensitivity analyses                                                                                                                                                | 12                 |

|                          |     |                                                                                                                                                                                                              |                                                |
|--------------------------|-----|--------------------------------------------------------------------------------------------------------------------------------------------------------------------------------------------------------------|------------------------------------------------|
| <b>Results</b>           |     |                                                                                                                                                                                                              |                                                |
| Participants             | 13* | (a) Report numbers of individuals at each stage of study—eg numbers potentially eligible, examined for eligibility, confirmed eligible, included in the study, completing follow-up, and analysed            | N/A                                            |
|                          |     | (b) Give reasons for non-participation at each stage                                                                                                                                                         | N/A                                            |
|                          |     | (c) Consider use of a flow diagram                                                                                                                                                                           | Not provided now: can be provided if requested |
| Descriptive data         | 14* | (a) Give characteristics of study participants (eg demographic, clinical, social) and information on exposures and potential confounders                                                                     | 10, 11, 12, Table 1                            |
|                          |     | (b) Indicate number of participants with missing data for each variable of interest                                                                                                                          | 10                                             |
|                          |     | (c) Summarise follow-up time (eg, average and total amount)                                                                                                                                                  | N/A                                            |
| Outcome data             | 15* | Report numbers of outcome events or summary measures over time                                                                                                                                               | 10, Table 2                                    |
| Main results             | 16  | (a) Give unadjusted estimates and, if applicable, confounder-adjusted estimates and their precision (eg, 95% confidence interval). Make clear which confounders were adjusted for and why they were included | 11, Table 2 and 3                              |
|                          |     | (b) Report category boundaries when continuous variables were categorized                                                                                                                                    | Not applicable                                 |
|                          |     | (c) If relevant, consider translating estimates of relative risk into absolute risk for a meaningful time period                                                                                             | Not done                                       |
| Other analyses           | 17  | Report other analyses done—eg analyses of subgroups and interactions, and sensitivity analyses                                                                                                               | 11 and Table 2                                 |
| <b>Discussion</b>        |     |                                                                                                                                                                                                              |                                                |
| Key results              | 18  | Summarise key results with reference to study objectives                                                                                                                                                     | 12                                             |
| <b>Limitations</b>       |     |                                                                                                                                                                                                              |                                                |
| Interpretation           | 20  | Give a cautious overall interpretation of results considering objectives, limitations, multiplicity of analyses, results from similar studies, and other relevant evidence                                   | 12, 13, 14, 15                                 |
| Generalisability         | 21  | Discuss the generalisability (external validity) of the study results                                                                                                                                        | 15                                             |
| <b>Other information</b> |     |                                                                                                                                                                                                              |                                                |
| Funding                  | 22  | Give the source of funding and the role of the funders for the present study and, if applicable, for the original study on which the present article is based                                                | 17, 18                                         |

\*Give information separately for cases and controls in case-control studies and, if applicable, for exposed and unexposed groups in cohort and cross-sectional studies.

1  
2 **Note:** An Explanation and Elaboration article discusses each checklist item and gives methodological background and published examples of transparent reporting. The STROBE  
3 checklist is best used in conjunction with this article (freely available on the Web sites of PLoS Medicine at <http://www.plosmedicine.org/>, Annals of Internal Medicine at  
4 <http://www.annals.org/>, and Epidemiology at <http://www.epidem.com/>). Information on the STROBE Initiative is available at [www.strobe-statement.org](http://www.strobe-statement.org).  
5  
6  
7  
8  
9  
10  
11  
12  
13  
14  
15  
16  
17  
18  
19  
20  
21  
22  
23  
24  
25  
26  
27  
28  
29  
30  
31  
32  
33  
34  
35  
36  
37  
38  
39  
40  
41  
42  
43  
44  
45  
46

For peer review only

# BMJ Open

## Neighborhood socioeconomic status modifies the association between anxiety and depression during pregnancy and preterm birth: A Community-based Canadian Cohort Study

|                                 |                                                                                                                                                                                                                                                                                                                                                                                                                                                                           |
|---------------------------------|---------------------------------------------------------------------------------------------------------------------------------------------------------------------------------------------------------------------------------------------------------------------------------------------------------------------------------------------------------------------------------------------------------------------------------------------------------------------------|
| Journal:                        | <i>BMJ Open</i>                                                                                                                                                                                                                                                                                                                                                                                                                                                           |
| Manuscript ID                   | bmjopen-2019-031035.R2                                                                                                                                                                                                                                                                                                                                                                                                                                                    |
| Article Type:                   | Original research                                                                                                                                                                                                                                                                                                                                                                                                                                                         |
| Date Submitted by the Author:   | 28-Dec-2019                                                                                                                                                                                                                                                                                                                                                                                                                                                               |
| Complete List of Authors:       | Adhikari, Kamala; University of Calgary Cumming School of Medicine<br>Patten, Scott<br>Williamson, Tyler; University of Calgary Cumming School of Medicine, Community Health Sciences<br>Patel, Alka<br>Premji, Shahirose ; York University,<br>Tough, Suzanne ; University of Calgary Cumming School of Medicine, Paediatrics and Community Health Science<br>Letourneau, Nicole<br>Giesbrecht, Gerald<br>Metcalf, Amy; University of Calgary, Obstetrics and Gynecology |
| <b>Primary Subject Heading</b>: | Epidemiology                                                                                                                                                                                                                                                                                                                                                                                                                                                              |
| Secondary Subject Heading:      | Mental health, Obstetrics and gynaecology, Public health                                                                                                                                                                                                                                                                                                                                                                                                                  |
| Keywords:                       | MENTAL HEALTH, EPIDEMIOLOGY, Preterm birth, Neighbourhood socioeconomic status                                                                                                                                                                                                                                                                                                                                                                                            |
|                                 |                                                                                                                                                                                                                                                                                                                                                                                                                                                                           |

SCHOLARONE™  
Manuscripts



I, the Submitting Author has the right to grant and does grant on behalf of all authors of the Work (as defined in the below author licence), an exclusive licence and/or a non-exclusive licence for contributions from authors who are: i) UK Crown employees; ii) where BMJ has agreed a CC-BY licence shall apply, and/or iii) in accordance with the terms applicable for US Federal Government officers or employees acting as part of their official duties; on a worldwide, perpetual, irrevocable, royalty-free basis to BMJ Publishing Group Ltd ("BMJ") its licensees and where the relevant Journal is co-owned by BMJ to the co-owners of the Journal, to publish the Work in this journal and any other BMJ products and to exploit all rights, as set out in our [licence](#).

The Submitting Author accepts and understands that any supply made under these terms is made by BMJ to the Submitting Author unless you are acting as an employee on behalf of your employer or a postgraduate student of an affiliated institution which is paying any applicable article publishing charge ("APC") for Open Access articles. Where the Submitting Author wishes to make the Work available on an Open Access basis (and intends to pay the relevant APC), the terms of reuse of such Open Access shall be governed by a Creative Commons licence – details of these licences and which [Creative Commons](#) licence will apply to this Work are set out in our licence referred to above.

Other than as permitted in any relevant BMJ Author's Self Archiving Policies, I confirm this Work has not been accepted for publication elsewhere, is not being considered for publication elsewhere and does not duplicate material already published. I confirm all authors consent to publication of this Work and authorise the granting of this licence.

1  
2  
3  
4 **Neighborhood socioeconomic status modifies the association between anxiety and**  
5  
6 **depression during pregnancy and preterm birth: A Community-based Canadian Cohort**  
7  
8 **Study**  
9

10  
11  
12  
13 Kamala Adhikari<sup>1</sup>, Scott B Patten<sup>1</sup>, Tyler Williamson<sup>1</sup>, Alka B Patel<sup>1,2</sup>, Shahirose Premji<sup>3</sup>,  
14  
15 Suzanne Tough<sup>1,4</sup>, Nicole Letourneau<sup>1,4,5,8</sup>, Gerald Giesbrecht<sup>1,4</sup>, Amy Metcalfe<sup>1,6,7</sup>  
16  
17

18  
19  
20 <sup>1</sup>Department of Community Health Sciences, University of Calgary, Calgary, Canada; <sup>2</sup>Applied  
21  
22 Research and Evaluation- Primary Health Care, Alberta Health Services, Calgary,  
23  
24 Canada; <sup>3</sup>School of Nursing, Faculty of Health, York University, Calgary, Canada; <sup>4</sup>Department  
25  
26 of Pediatrics, University of Calgary, Calgary, Canada; <sup>5</sup>Faculty of Nursing University of  
27  
28 Calgary, Calgary, Canada; <sup>6</sup>Department of Obstetrics and Gynecology, University of Calgary,  
29  
30 Calgary, Canada; <sup>7</sup>Department of Medicine, University of Calgary, Calgary, Canada; <sup>8</sup>Department  
31  
32 of Psychiatry, University of Calgary, Calgary, Canada  
33  
34  
35  
36  
37  
38

39 **Corresponding author:**

40  
41 Kamala Adhikari

42  
43 Department of Community Health Sciences, University of Calgary

44  
45 3280 Hospital Drive NW, Calgary, AB, T2N 4Z6

46  
47 Email: [kamala.adhikaridahal@ucalgary.ca](mailto:kamala.adhikaridahal@ucalgary.ca)

48  
49 Telephone number: 1+5870-700-7531

50  
51 ORCID number: 0000-0003-2872-9496  
52  
53  
54  
55  
56  
57  
58  
59  
60

1  
2  
3  
4  
5  
6  
7  
8  
9  
10  
11  
12  
13  
14  
15  
16  
17  
18  
19  
20  
21  
22  
23  
24  
25  
26  
27  
28  
29  
30  
31  
32  
33  
34  
35  
36  
37  
38  
39  
40  
41  
42  
43  
44  
45  
46  
47  
48  
49  
50  
51  
52  
53  
54  
55  
56  
57  
58  
59  
60

**Word Count: 3686**

For peer review only



## Abstract

**Objective:** This study examined the association of anxiety alone, depression alone, and the presence of both anxiety and depression with PTB and further examined whether neighborhood socioeconomic status (SES) modified this association.

**Design:** Cohort study using individual-level data from two community-based prospective pregnancy cohort studies (All Our Families (AOF)) and Alberta Pregnancy Outcomes and Nutrition (APrON)) and neighborhood SES data from the 2011 Canadian census.

**Setting:** Calgary, Alberta, Canada

**Participants:** Overall, 5,538 pregnant women who were <27 weeks of gestation and >15 years old were enrolled in the cohort studies between 2008 and 2012. 3,341 women participated in the AOF study and 2,187 women participated in the APrON study, with 231 women participated in both studies. Women who participated in both studies were only counted once.

**Primary and secondary outcome measures:** PTB was defined as delivery prior to 37 weeks of gestation. Depression was defined as an Edinburgh Postnatal Depression Scale (EPDS) score of  $\geq 13$ , anxiety was defined as an EPDS-anxiety subscale score of  $\geq 6$ , and the presence of both anxiety and depression was defined as meeting both anxiety and depression definitions.

**Results:** Overall, 7.3% of women delivered preterm infants. The presence of both anxiety and depression, but neither of these conditions alone, was significantly associated with PTB

1  
2  
3 (OR=1.6, 95% CI=1.1, 2.3) and had significant interaction with neighborhood deprivation (p-  
4 value=0.004). The predicted probability of PTB for women with both anxiety and depression  
5 was 10.0%, which increased to 15.7% if they lived in the most deprived neighborhoods and  
6 decreased to 1.4% if they lived in the least deprived neighborhoods.  
7  
8  
9  
10  
11  
12  
13

14 **Conclusions:** Effects of anxiety and depression on risk of PTB differ depending on where  
15 women live. This understanding may guide the identification of women at increased risk for PTB  
16 and allocation of resources for early identification and management of anxiety and depression.  
17  
18  
19  
20  
21  
22  
23

24 **Keywords:** anxiety and depression, neighborhood socioeconomic status, deprivation, preterm  
25 birth  
26  
27  
28  
29  
30  
31  
32  
33  
34  
35  
36  
37  
38  
39  
40  
41  
42  
43  
44  
45  
46  
47  
48  
49  
50  
51  
52  
53  
54  
55  
56  
57  
58  
59  
60

### Article summary: strengths and limitations of this study

- This study used data from two community-based prospective pregnancy cohort studies that were conducted in a relatively representative sample (compared to a hospital-based or clinic-based sample) of pregnant women.
- This study performed statistical analysis to examine the relationship between anxiety and depression during pregnancy and preterm birth by analyzing the presence of both depressive and anxious symptoms versus isolated depressive or anxious symptoms as risk factors of preterm birth, and further analyzing whether neighborhood socioeconomic status modifies the relationship.
- This study analyzed overall preterm birth as data on spontaneous and iatrogenic preterm birth were not available.
- The study sample over-represents women from urban areas of Alberta, with high socioeconomic status, thus limiting the generalizability of the findings to urban settings.
- The use of self-reported anxiety and depression measurement scales may introduce measurement inaccuracy.

## BACKGROUND

Worldwide, a total of 15 million births occur preterm (i.e., before 37 weeks of gestation), with a global average rate of 11.1%.<sup>(1)</sup> Preterm birth (PTB) is responsible for 35% of neonatal deaths globally.<sup>(2)</sup> Among survivors, it is also a significant risk factor for short and long-term morbidities, such as respiratory distress syndrome, cerebral palsy, and learning difficulties.<sup>(3-5)</sup> Despite substantial research and interventions to prevent PTB, the incidence of PTB has not declined and its etiology remains unclear.<sup>(1, 6)</sup> Understanding the risk factors for PTB, such as psychosocial distress and neighborhood low socioeconomic status (SES), may help identify women at increased risk, and assist in the allocation of resources, ultimately reducing the incidence of PTB.

PTB has been linked to psychosocial distress during pregnancy, specifically anxiety and depression – the most common mental health problems during pregnancy.<sup>(7-10)</sup> However, the association between anxiety and depression during pregnancy and PTB is incompletely understood. Many previous studies on the association between anxiety and depression and PTB were conducted in medical settings (i.e. hospital and clinic) with small samples and high rates of attrition.<sup>(7, 9, 10)</sup> Notably, most of the previous studies analyzed anxiety or depression without considering that they may occur in a comorbid state.<sup>(7-11)</sup> Comorbid anxiety and depression is, in fact, common (affecting up to 50% of women with anxiety or depression) and is more likely to involve severe symptoms of anxiety and depression than isolated anxiety or depression.<sup>(12-14)</sup> Thus, comorbid anxiety and depression may pose a higher risk of PTB than isolated anxiety or depression, which may influence the association between anxiety or depression and PTB.

Anxiety and depression are negatively correlated with neighborhood SES.<sup>(15)</sup> Neighborhood SES is an area-level measure of SES, which aggregates individual SES (such as

1  
2  
3 income, education, and employment status) at a certain geographical level.(16) Neighborhood  
4  
5 SES may influence the risk of PTB by exposing women to health benefitting or risk elevating  
6  
7 factors, such as access to healthy foods, quality health services, opportunities for leisure activity,  
8  
9 and social support and exposure to societal stressors, crimes, and poor air and water quality.(16-  
10  
11 19) Low neighborhood SES may affect an individual's ability to fulfill daily needs, access  
12  
13 resources, make lifestyle choices, and cope with different situations.(16-19) Thus, the risk of  
14  
15 PTB that is associated with anxiety and/or depression during pregnancy may differ by  
16  
17 neighborhood SES. To our knowledge, this has not been examined.  
18  
19  
20

21  
22 This study examined the association of the presence of anxiety symptoms alone,  
23  
24 depression symptoms alone, and both anxiety and depression symptoms with PTB. This study  
25  
26 further examined whether the presence of anxiety, depression, and both anxiety and depression  
27  
28 interact with neighborhood SES to increase the risk of PTB. This may help to determine the  
29  
30 subgroups of women who are at increased risk for PTB.  
31  
32  
33  
34

## 35 **METHODS**

### 36 **Data sources**

37  
38  
39 This study combined datasets from two community-based prospective pregnancy cohort  
40  
41 studies in Alberta, Canada (n=5,528). The All Our Families (AOF) cohort study recruited 3,341  
42  
43 pregnant women and the Alberta Pregnancy Outcomes and Nutrition (APrON) cohort study  
44  
45 recruited 2,187 pregnant women, with 231 women participating in both studies. Women  
46  
47 contributed only one pregnancy in the cohort. Women who participated in both studies were only  
48  
49 counted once. The description and comparability of these two cohort studies is available  
50  
51 elsewhere,(20, 21) and justifies combining these data sources.(22) The AOF study aimed to  
52  
53  
54  
55  
56  
57  
58  
59  
60

1  
2  
3 examine maternal well-being and infant outcomes and the APrON study aimed to investigate the  
4 role of prenatal maternal nutrition on maternal mental health and infant outcomes.(20, 21)  
5  
6 Briefly, each cohort study had similar inclusion criteria, sampling design (community-based,  
7 non-stratified sampling), and data collection methods.(21) Both studies recruited pregnancy  
8 cohorts between 2008 and 2012 using community-based recruitment strategies (such as face-to-  
9 face recruitment in maternity clinics by research assistants or nurses and recruitment in public  
10 places using posters, pamphlets, and brochures) and followed them up. The follow-up for mother  
11 and child dyad is still ongoing in both studies.(21)  
12  
13  
14  
15  
16  
17  
18  
19  
20

21 We obtained two de-identified cohort datasets linked with neighborhood SES data from  
22 SAGE (Secondary Analysis to Generate Evidence), the secure data repository developed by  
23 PolicyWise for Children & Families, which houses these datasets. Ethics approval for this study  
24 was obtained from the Conjoint Health Research Ethics Board at the University of Calgary.  
25  
26  
27  
28  
29

### 30 **Patient and public involvement**

31 This study used de-identified secondary data. Patient and public were not involved in the  
32 design or planning of the study.  
33  
34  
35  
36

### 37 **Variables**

38 Variables that were deemed similar in the two studies were harmonized and appended  
39 into a single new dataset. Women who participated in both studies (n=231) were counted only  
40 once. Data on age, ethnicity (white includes all Caucasians and non-white includes all non-  
41 Caucasians), maternal SES, parity, body mass index (BMI), smoking status, social support,  
42 depression, and anxiety were collected at <27 weeks of gestation (in the APrON study) and at  
43 <25 weeks of gestation (in the AOF study). BMI was calculated based on the self-reported pre-  
44 pregnancy height and weight (i.e., immediately before pregnancy). Additionally, depression and  
45  
46  
47  
48  
49  
50  
51  
52  
53  
54  
55  
56  
57  
58  
59  
60

1  
2  
3 anxiety were measured during the third trimester (APrON: 27-42 weeks of gestation; AOF: 34-  
4  
5 36 weeks of gestation).(20, 21)  
6  
7

8 Both cohorts used an identical measure of depression, i.e., the Edinburgh Depression  
9  
10 Scale (EPDS). The EPDS is a 10-item self-reported scale with each item ranging from 0 to 3 to  
11  
12 assess symptoms of current depression (i.e. how women have felt in the past 7 days).(23) The  
13  
14 EPDS has high internal consistency of 0.87,(23) a sensitivity of 78%, and specificity of 99% in  
15  
16 the obstetric population,(24, 25) and is the most common scale used to measure antenatal and  
17  
18 postnatal depression.(26) The recommended standard cut-off score of  $\geq 13$  out of 30 points on the  
19  
20 EPDS was used to define the presence of clinically significant depression during pregnancy.(27)  
21  
22 While the EPDS was specifically designed to assess depression, three items (namely items 3, 4,  
23  
24 and 5) comprising the anxiety subscale (EDPS-3A) have been suggested as a measure of anxiety  
25  
26 by previous studies,(28, 29) with a sensitivity of 66.7% and specificity of 88.2% in the obstetric  
27  
28 population.(29)The standard cut-off of  $\geq 6$  out of a maximum of 9 is used to define the presence  
29  
30 of clinically significant anxiety during pregnancy.(29) The cohort studies used different  
31  
32 measures of anxiety: the AOF study used the State-Trait Anxiety Inventory and the APrON study  
33  
34 used the Symptoms Checklist 90. Thus, the EDPS-3A was chosen as a measure of anxiety to  
35  
36 have a consistent measure across studies and to avoid the introduction of misclassification bias  
37  
38 related to the use of different tools. Presence of isolated anxiety or depression was defined as  
39  
40 meeting the anxiety or depression definition during pregnancy. Presence of both anxiety and  
41  
42 depression was defined as meeting both anxiety and depression definitions at the same time point  
43  
44 in pregnancy. Births that occurred before 37 weeks of gestation were defined as PTB (both  
45  
46 spontaneous and iatrogenic included). PTB was measured at 4 months of postpartum period  
47  
48 based on maternal recall of week of gestation at delivery.  
49  
50  
51  
52  
53  
54  
55  
56  
57  
58  
59  
60

1  
2  
3 Neighborhood SES data were measured by the Pampalon material deprivation index  
4 (derived from the 2011 Statistics Canada census)(30, 31) which was aggregated at the  
5 dissemination area (DA) level. DA is the smallest geographical unit available in the Canadian  
6 census, consisting of 400-700 persons.(32) The Pampalon material deprivation index is a  
7 composite measure of neighborhood SES that combines the proportion of persons without high  
8 school diplomas, the average personal income, and the rate of unemployment within the DA. It is  
9 used as a deprivation quintile, with quintile 1 representing the least deprived and quintile 5  
10 representing the most deprived neighborhoods.(30) Neighborhood SES was assigned to each  
11 cohort based on their postal code of residence at the time of cohort recruitment.  
12  
13  
14  
15  
16  
17  
18  
19  
20  
21  
22  
23

#### 24 **Data Analysis**

25  
26 Bivariate analysis was used to identify variables associated with PTB as well as anxiety  
27 and/or depression (“anxiety only,” “depression only,” and “both anxiety and depression”). The  
28 significantly associated ( $p < 0.05$ ) variables were parity, ethnicity, and body mass index. A  
29 multivariable logistic regression model was constructed to examine the association between  
30 anxiety and/or depression and PTB. The model also included parity, ethnicity, BMI, maternal  
31 age, smoking, social support, maternal education, and household total income variables. These  
32 variables were selected to adjust for in the model based on our prior knowledge (or conceptual  
33 understanding based on literature) that they are associated with both outcome (i.e., PTB) and  
34 exposure (i.e., anxiety and/or depression) but do not reside in the causal pathway of the  
35 relationship between anxiety and/or depression and PTB. The underlying hypothetical  
36 relationship of the variables have been shown using a direct acyclic diagram (supplementary file:  
37 Figure 1)  
38  
39  
40  
41  
42  
43  
44  
45  
46  
47  
48  
49  
50  
51  
52

53 A multilevel multivariable logistic regression model, which assumes the lack of  
54  
55  
56  
57  
58  
59  
60



1  
2  
3 independence of observations and accounts for the variation between groups or areas, was then  
4  
5 constructed to examine the effect modification of neighborhood SES on the association between  
6  
7 anxiety and/or depression and PTB. This model included interaction terms in addition to parity,  
8  
9 ethnicity, BMI, maternal age, smoking, social support, maternal education, and household total  
10  
11 income variables. The interaction terms comprised “anxiety only,” “depression only,” and “both  
12  
13 anxiety and depression” combined with each quintile of deprivation indices. Deprivation quintile  
14  
15 4<sup>th</sup> and 5<sup>th</sup> were combined as there were few or no cases in some strata.  
16  
17

18  
19 The presence of significant interactions was identified through the p-values associated  
20  
21 with beta coefficients of each interaction term. Subsequently, we constructed another model  
22  
23 without the interaction terms. A likelihood ratio test was used to compare the goodness of model  
24  
25 fit between those two nested models – with and without the interaction terms. Adjusted  
26  
27 prediction of PTB (i.e., predicted probability of PTB that was evaluated at the average value of  
28  
29 covariates, parity, ethnicity, BMI, maternal age, smoking, social support, maternal education,  
30  
31 and household total income variables, across observations) was estimated using the model with  
32  
33 interaction terms. Alpha ( $\alpha$ ) of <0.05 was used to determine statistical significance. All analyses  
34  
35 were performed using STATA/IC 14.1.  
36  
37  
38

### 39 40 **Missing Data**

41  
42 The proportion of missing data for gestational age at delivery (PTB) was 7.5%, for  
43  
44 neighborhood deprivation indices was 7.8%, and for body mass index was 6.8%. Other variables  
45  
46 had missing data <5%, ranging from 1.3% for depression to 4.4% for household total income.  
47  
48 The missing data for these variables occurred due to maternal non-response. Characteristics of  
49  
50 groups of women (such as ethnicity, parity, BMI, neighborhood SES, anxiety and depression)  
51  
52 with and without missing data on PTB were compared to assess differences. Multiple imputation  
53  
54  
55  
56  
57  
58  
59  
60

1  
2  
3 was used to address with missing data on the three variables (i.e., PTB , body mass index, and  
4 neighborhood deprivation indices) that had  $\geq 5\%$  missing data .(33) Using STATA's "mi  
5  
6 Package", the multiple imputation process was carried out in three steps as recommended by  
7  
8 Rubin: imputation, analysis, and combination.(33, 34) The method assumes that the missing data  
9  
10 are missing at random and attempts to estimate a missing value within a plausible set of  
11  
12 values.(33, 34) The imputation values (i.e., a predictive distribution based on observed data)  
13  
14 were estimated using an imputation model (with imputation 50 times).(33, 34) The imputation  
15  
16 model included the variables that were significant with missing data (i.e., marital status, duration  
17  
18 of stay in Canada, intended pregnancy, alcohol consumption) as well as those that were utilized  
19  
20 in the analysis model (i.e., PTB, ethnicity, parity, BMI, maternal age, smoking, social support  
21  
22 maternal education, household total income, neighborhood SES, anxiety and depression, and  
23  
24 interaction terms). Sensitivity analysis was done to compare the estimates from the analyses  
25  
26 based on multiple imputation and from the analysis restricted to complete case.  
27  
28  
29  
30  
31  
32  
33  
34

## 35 RESULTS

36  
37 Of total 5,297 pregnant women, 17.9% of women had anxiety and/or depression: 7.7% of  
38  
39 women had both anxiety and depression, followed by 6.0% women had anxiety alone, and 4.2%  
40  
41 women had depression alone. Women with both anxiety and depression had a higher rate of PTB  
42  
43 (10.6%) compared to those with isolated anxiety (6.5%) or isolated depression (8.2%) or without  
44  
45 anxiety and depression (6.9%). A higher proportion of women with a presence of both anxiety  
46  
47 and depression (compared to those with anxiety or depression alone) were single, non-white,  
48  
49 recent immigrants, had a low household income, and were from the most deprived  
50  
51 neighborhoods (p<0.05) (Table 1). Mean scores of anxiety (mean=6.6, standard deviation  
52  
53  
54  
55  
56  
57  
58  
59  
60

1  
2  
3 (SD)=0.4) and depression (mean=16.2, SD=0.1) were higher among women with both conditions  
4  
5 compared to those with anxiety alone (mean=6.1, SD=0.2) or depression alone (mean=14.6,  
6  
7 SD=0.1). As shown in Table 2, women who delivered preterm infants were more likely to be  
8  
9 non-white, obese, primiparous, and from the most deprived neighborhoods. Variables such as  
10  
11 maternal ethnicity, parity, BMI, neighborhood SES, anxiety, and depression were significantly  
12  
13 associated with the presence of missing data on PTB.  
14  
15

16  
17 The presence of both anxiety and depression (adjusted odds ratio (aOR)=1.6, 95%  
18  
19 CI=1.1, 2.3), but neither anxiety alone (aOR=0.8, 95% CI=0.6, 1.6) nor depression alone  
20  
21 (aOR=1.3, 95% CI=0.8, 2.5), was significantly associated with PTB (Table 3). Effect  
22  
23 modification was observed between the presence of both anxiety and depression and  
24  
25 neighborhood SES (p-value=0.004). Compared to women without anxiety and depression,  
26  
27 women with both anxiety and depression who lived in quintile 3 and more deprived  
28  
29 neighborhoods had significantly increased odds of experiencing a preterm delivery (quintile 4  
30  
31 and 5: aOR=2.2, 95% CI=1.3, 4.0). In contrast, compared to women without anxiety and  
32  
33 depression, women with both anxiety and depression who lived in the least deprived  
34  
35 neighborhood were not at elevated odds of experiencing a preterm delivery (aOR=0.2, 95 %  
36  
37 CI=0.1, 1.5) (Table 3). The OR estimates from the analyses based on multiple imputation and  
38  
39 from the analysis restricted to complete cases were similar, with some confidence intervals being  
40  
41 slightly narrower in the multiple imputation analysis.  
42  
43  
44  
45  
46

47 As shown in Table 4, the predicted probability of PTB for women with a presence of both  
48  
49 anxiety and depression was 10.0% (95% CI=6.8, 13.1). It increased to 15.7% (95% CI=9.5, 23.2)  
50  
51 if they lived in the most deprived neighborhoods – an increase of 57.1% – and it decreased to  
52  
53 1.4% (95% CI=0.1, 4.2) if they lived in the least deprived neighborhoods. The predicted  
54  
55  
56  
57  
58  
59  
60

1  
2  
3 probability of PTB for women with depression alone was 9.6% (95% CI=5.2, 14.1), which  
4  
5 increased to 14.1% (95% CI=2.7, 25.3) if they lived in the most deprived neighborhoods. The  
6  
7 predicted probability for women with anxiety alone and women with absence of anxiety and  
8  
9 depression remained similar across the neighborhood deprivation indices.  
10  
11  
12  
13

## 14 **DISCUSSION**

### 15 **Main findings**

16  
17  
18  
19 This study examined the association of anxiety alone, depression alone, and the presence  
20  
21 of both anxiety and depression during pregnancy with PTB, using data from two community-  
22  
23 based pregnancy cohort studies in Alberta, Canada. The study found an association between the  
24  
25 presence of both anxiety and depression and PTB, which significantly differed according to  
26  
27 neighborhood SES. Women with both anxiety and depression were more likely to deliver  
28  
29 preterm infants if they lived in a relatively more deprived neighborhood compared to if they  
30  
31 lived in a less deprived neighborhood. For women with both anxiety and depression, the absolute  
32  
33 predicted probability of delivering preterm infants was 16% if these women lived in the most  
34  
35 deprived neighborhood and it was 1% if they lived in the least deprived neighborhood. Overall,  
36  
37 the findings suggest the importance of neighborhoods on maternal health (in general) and more  
38  
39 specifically preterm birth.  
40  
41  
42  
43

### 44 **Interpretation**

45  
46  
47 Although few previous studies assessed the association between the presence of both  
48  
49 anxiety and depression during pregnancy and PTB, our finding is consistent with their findings  
50  
51 that the presence of both anxiety and depression increases the likelihood of PTB.(14, 35, 36)  
52  
53 This may be related to the additive effects of prenatal depression and anxiety and the effects of  
54  
55  
56  
57  
58  
59  
60

1  
2  
3 severity of anxiety and depressive symptoms. Previous studies conducted in the general  
4  
5 population and in pregnant women found a higher score of anxiety or depression symptoms  
6  
7 among those with both anxiety and depression than those with isolated anxiety or depression.(36,  
8  
9 37). It is also reported in previous studies that individuals with both anxiety and depression have  
10  
11 longer depressive episodes, worse psychosocial impairment, poorer response to medication,  
12  
13 compromised quality of life, and increased suicidality than those with isolated anxiety or  
14  
15 depression.(12, 35, 37) Thus, the presence of both anxiety and depression during pregnancy may  
16  
17 lead to an increased risk of poor birth outcomes, including PTB, relative to depression or anxiety  
18  
19 alone.  
20  
21  
22  
23

24 Our study did not find an association between anxiety alone or depression alone and  
25  
26 PTB, which is consistent with a previous pregnancy cohort study that analyzed isolated anxiety  
27  
28 or depression separately from the presence of both or comorbid anxiety and depression.(36)  
29  
30 However, the finding is inconsistent with several previous studies that analyzed anxiety or  
31  
32 depression intermixing with the presence of both conditions.(8, 10) It is possible that the  
33  
34 association described in the literature requires high levels of anxiety or depression, which is  
35  
36 more likely present in the presence of both anxiety and depression symptoms or disorders. Thus,  
37  
38 the associations found in previous studies may have been confounded by the presence of both  
39  
40 anxiety and depression symptoms or comorbid anxiety and depression disorders. The increased  
41  
42 risk of PTB associated with the presence of both anxiety and depression (but not with isolated  
43  
44 anxiety or depression) may, in part, explain the inconsistencies across previous findings on the  
45  
46 association between prenatal anxiety or depression and PTB. Similarly, previous studies did not  
47  
48 analyze the association stratified by neighborhood SES, meaning that these studies averaged the  
49  
50  
51  
52  
53  
54  
55  
56  
57  
58  
59  
60

1  
2  
3 association across neighborhood SES, which may also explain the inconsistencies across  
4  
5 previous studies findings.  
6

7  
8 A strong association between the presence of both anxiety and depression and PTB  
9  
10 among women living in a relatively more deprived neighborhood may reflect that, besides  
11  
12 individual level risk factors, PTB is related to neighborhood factors.(16-18) For example, women  
13  
14 living in deprived neighborhoods often have less access to healthy foods, quality health services,  
15  
16 and opportunities for leisure activity, and have more exposure to societal stressors and  
17  
18 crimes.(16-19) Anxious and depressed women living in less advantaged areas may interpret the  
19  
20 deprivation associated stressors more acutely and have less support or are less able to manage or  
21  
22 cope with their stressors, making them severely emotionally distressed compared to those living  
23  
24 in more advantaged areas.(8, 11, 38, 39) Consequently, the elevated risk of delivering preterm is  
25  
26 more likely to occur in this group of women. However, it is important to note that, the  
27  
28 relationship between mental illness and impoverishment is difficult to interpret as causal, given  
29  
30 the bi-directional relationship between them. Furthermore, in our study, the group of women  
31  
32 with both anxiety and depression (who often have severe symptoms of anxiety or depression) in  
33  
34 the least deprived neighborhoods had an exceptionally low rate of PTB. The observed  
35  
36 association between the presence of both anxiety and depression and PTB among women living  
37  
38 in a relatively more deprived neighborhood seems to depend on this result. Thus, the replication  
39  
40 of this finding seems important.  
41  
42  
43  
44  
45

### 46 **Strengths and limitations**

47  
48  
49 To our knowledge, few studies have directly examined the presence of both depressive  
50  
51 and anxious symptoms versus isolated depressive or anxious symptoms as risk factors of PTB,  
52  
53 and no studies have examined neighborhood SES as a modifier to the relationship between  
54  
55  
56  
57  
58  
59  
60

1  
2  
3 anxiety and/or depression and PTB. This study is important given its focus on the commonest  
4  
5 psychological condition (i.e., comorbid anxiety and depression) and the importance of  
6  
7 identification of specific groups of women who may benefit the most from the preventive  
8  
9 interventions. This study used two community-based prospective pregnancy cohort studies. This  
10  
11 provided an opportunity to describe PTB across the several strata of anxiety, depression, and  
12  
13 both anxiety and depression and neighborhood SES in a relatively representative sample  
14  
15 (compared, for example, to a hospital- or clinic-based sample) of pregnant women. However,  
16  
17 even using the two cohorts, some strata had few cases of preterm infants, which may have led to  
18  
19 the observed imprecise and/or insignificant estimates (specifically in a group with depression  
20  
21 alone). As these cohorts over-represent women with high SES,(21, 40, 41) it limits the  
22  
23 generalizability of the findings to other demographic groups. While the use of prospective  
24  
25 measurement of depression and anxiety reduces the chance of misclassifications due to recall  
26  
27 bias, the use of self-reported anxiety and depression measurement scales may have introduced  
28  
29 measurement inaccuracy. Specifically, the EPDS-3A scale has not been validated in a pregnant  
30  
31 population and it tends to provide high false-positive results based on its validation on during the  
32  
33 postpartum period.(28, 29) Furthermore, the EPDS-3A is a subscale of the EPDS. The standard  
34  
35 cut-off point for the EPDS excluding the items of the EPDS-3A has not been established. While  
36  
37 the use of a single scale may overestimate the presence of anxiety and/or depression, being able  
38  
39 to identify combined anxiety and depression group using a single scale is advantageous as it  
40  
41 facilitates for intervention design. While we examined the association between anxiety and/or  
42  
43 depression and PTB analyzing the influence of several potential confounders, other confounders  
44  
45 such as antidepressant use, other psychiatric conditions, and medical risk factors that may  
46  
47 influence the associations were not considered since they were not available in the study's data  
48  
49  
50  
51  
52  
53  
54  
55  
56  
57  
58  
59  
60

1  
2  
3 sources. Similarly, we were not able to separate out spontaneous and iatrogenic PTB in the  
4  
5 model – the association might be stronger for spontaneous PTB. Overall, replication of this study  
6  
7 addressing these limitations may further the understanding on risk factors and preventive  
8  
9 strategies of PTB.  
10  
11

12 We defined neighborhoods using the smallest area (i.e., dissemination area) where people  
13  
14 living in the smallest area are more likely to be similar for the outcomes, used multilevel analysis  
15  
16 that accounts for area-level variation, and adjusted for individual level variables, an appropriate  
17  
18 analytical approach for multilevel data. However, it is difficult to interpret the influence of  
19  
20 neighborhood SES using area-based variables, where women living in the same area share the  
21  
22 same value for the variable. Individuals who live in the same area may also experience different  
23  
24 contextual influences from many other areal units, and the timing and duration in which  
25  
26 individuals experienced these contextual influences is also uncertain.  
27  
28  
29

### 30 31 **Conclusions**

32  
33 Our study found that the presence of both prenatal anxiety and depression increases the  
34  
35 likelihood of PTB and the effect of this combination is stronger for women living in low SES  
36  
37 neighborhoods compared to women living in high SES neighborhoods. The finding may help to  
38  
39 inform development of intervention strategies (such as timely screening and management of  
40  
41 anxiety and depression) that focus on the most deprived neighborhood. Furthermore, future  
42  
43 research that examines the influence of severity of anxiety and depression on risk of PTB may  
44  
45 further the understanding on risk factors and preventive strategies of PTB.  
46  
47  
48  
49  
50  
51  
52  
53  
54  
55  
56  
57  
58  
59  
60



### **Authors contributions**

Kamala Adhikari involved in the conception and design of the study. Kamala is also responsible for conducting the analysis, interpreting the data, and drafting the manuscript. Amy Metcalfe provided overall supervision to Kamala in conducting this study and contributed to conception and study design, interpretation of data, provided intellectual content and revisions to manuscript. Scott Patten, Tyler Williamson, Alka B Patel, Shahirose Premji, Suzanne Tough, Nicole Letourneau, and Gerald Giesbrecht were involved in the conception and design of the study and provided interpretation and intellectual content to subsequent drafts of the manuscript. All authors read and approved the final draft.

### **Acknowledgements**

Kamala Adhikari was awarded the Vanier Canada Graduate Scholarship and the Alberta Innovates Graduate Studentship Award. Amy Metcalfe is supported by a Canadian Institutes of Health Research New Investigator Award. We acknowledge the All Our Families and the Alberta Pregnancy Outcomes and Nutrition cohort study teams for providing permission to use their data. We acknowledge SAGE (Secondary Analysis to Generate Evidence), the secure data repository developed by PolicyWise for Children and Families, which houses these datasets, for providing access to these datasets.

### **Role of funding agency**

Kamala Adhikari was awarded the Vanier Canada Graduate Scholarship (Award code: 201611CGV-382013-267341) by the Canadian Institutes of Health Research and the Alberta Innovates Graduate Studentship Award (Award code: 201611CGV-382013-267341) by the

1  
2  
3 Alberta Innovates to conduct this study. The funding agencies have no role in study design, data  
4 access, analysis, and interpretation, manuscript writing, and in the decision to submit the article  
5 for publication.  
6  
7  
8  
9

### 10 11 12 **Data sharing**

13  
14 Additional data such as statistical codes, supplementary tables, and technical appendix are  
15 available upon request (by emailing Kamala Adhikari: kamala.adhikaridahal@ucalgary.ca)  
16  
17  
18  
19

### 20 21 22 **Ethical statements**

23  
24 Ethics approval for this study was obtained from the Conjoint Health Research Ethics Board at  
25 the University of Calgary (REB16-2548\_REN1). This study used secondary data and all the data  
26 were anonymized; therefore, did not require informed consent.  
27  
28  
29

### 30 31 32 **Competing interests**

33  
34 The authors declare that they have no competing interests.  
35  
36  
37  
38  
39  
40  
41  
42  
43  
44  
45  
46  
47  
48  
49  
50  
51  
52  
53  
54  
55  
56  
57  
58  
59  
60

## References

1. Blencowe H, Cousens S, Oestergaard MZ, Chou D, Moller AB, Narwal R, et al. National, regional, and worldwide estimates of preterm birth rates in the year 2010 with time trends since 1990 for selected countries: a systematic analysis and implications. *Lancet*. 2012;379(9832):2162-72.
2. Liu L, Johnson HL, Cousens S, Perin J, Scott S, Lawn JE, et al. Global, regional, and national causes of child mortality: an updated systematic analysis for 2010 with time trends since 2000. *Lancet*. 2012;379(9832):2151-61.
3. Johnston KM, Gooch K, Korol E, Vo P, Eyawo O, Bradt P, et al. The economic burden of prematurity in Canada. *BMC Pediatr*. 2014;14:93.
4. Blencowe H, Cousens S, Chou D, Oestergaard M, Say L, Moller AB, et al. Born too soon: the global epidemiology of 15 million preterm births. *Reprod Health*. 2013;10 Suppl 1:S2.
5. Ward RM, Beachy JC. Neonatal complications following preterm birth. *Bjog*. 2003;110 Suppl 20:8-16.
6. Canadian Institute for Health Information (CIHI). CIHI Snapshot: Inpatient Hospitalizations, Surgeries, Newborns and Childbirth Indicators. Accessed from: [www.cihi.ca/free\\_products/cad\\_hospitalization\\_and\\_childbirth\\_snapshot\\_2015-2016\\_en.pdf](http://www.cihi.ca/free_products/cad_hospitalization_and_childbirth_snapshot_2015-2016_en.pdf).
7. Ding XX, Wu YL, Xu SJ, Zhu RP, Jia XM, Zhang SF, et al. Maternal anxiety during pregnancy and adverse birth outcomes: a systematic review and meta-analysis of prospective cohort studies. *J Affect Disord*. 2014;159:103-10.
8. Grote NK, Bridge JA, Gavin AR, Melville JL, Iyengar S, Katon WJ. A meta-analysis of depression during pregnancy and the risk of preterm birth, low birth weight, and intrauterine growth restriction. *Arch Gen Psychiatry*. 2010;67(10):1012-24.

- 1  
2  
3 9. Staneva A, Bogossian F, Pritchard M, Wittkowski A. The effects of maternal depression,  
4 anxiety, and perceived stress during pregnancy on preterm birth: A systematic review. *Women*  
5  
6 *Birth*. 2015;28(3):179-93.  
7
- 8  
9  
10 10. Rose MS, Pana G, Premji S. Prenatal Maternal Anxiety as a Risk Factor for Preterm Birth  
11 and the Effects of Heterogeneity on This Relationship: A Systematic Review and Meta-Analysis.  
12  
13 *Biomed Res Int*. 2016;2016:8312158.  
14
- 15  
16  
17 11. Alder J, Fink N, Bitzer J, Hosli I, Holzgreve W. Depression and anxiety during  
18 pregnancy: a risk factor for obstetric, fetal and neonatal outcome? A critical review of the  
19  
20 literature. *J Matern Fetal Neonatal Med*. 2007;20(3):189-209.  
21  
22
- 23  
24 12. Misri S, Swift E. Generalized Anxiety Disorder and Major Depressive Disorder in  
25 Pregnant and Postpartum Women: Maternal Quality of Life and Treatment Outcomes. *J Obstet*  
26  
27 *Gynaecol Can*. 2015;37(9):798-803.  
28  
29
- 30  
31 13. Wenzel A, Haugen EN, Jackson LC, Brendle JR. Anxiety symptoms and disorders at  
32 eight weeks postpartum. *J Anxiety Disord*. 2005;19(3):295-311.  
33  
34
- 35  
36 14. Field T, Diego M, Hernandez-Reif M, Figueiredo B, Deeds O, Ascencio A, et al.  
37 Comorbid depression and anxiety effects on pregnancy and neonatal outcome. *Infant Behav Dev*.  
38  
39 2010;33(1):23-9.  
40  
41
- 42  
43 15. Yang S, Kestens Y, Dahhou M, Daniel M, Kramer MS. Neighborhood deprivation and  
44 maternal psychological distress during pregnancy: a multilevel analysis. *Matern Child Health J*.  
45  
46 2015;19(5):1142-51.  
47  
48
- 49 16. Kawachi I and Berkman LF. *Neighborhood and Health*. New York: Oxford  
50  
51 University Press Inc.; 2003.  
52  
53  
54  
55  
56  
57  
58  
59

- 1  
2  
3 17. Diez Roux AV, Mair C. Neighborhoods and health. *Ann N Y Acad Sci.* 2010;1186:125-  
4  
5 45.  
6  
7  
8 18. Lynch JW, Kaplan GA. Socioeconomic Factors. In: Karachi I and Berkman LF, *Social*  
9  
10 *Epidemiology.* editor. New York: Oxford University Press; 2000.  
11  
12 19. Dunkel Schetter C. Psychological science on pregnancy: stress processes,  
13  
14 biopsychosocial models, and emerging research issues. *Annu Rev Psychol.* 2011;62:531-58.  
15  
16 20. Kaplan BJ, Giesbrecht GF, Leung BM, Field CJ, Dewey D, Bell RC, et al. The Alberta  
17  
18 *Pregnancy Outcomes and Nutrition (APrON) cohort study: rationale and methods. Matern Child*  
19  
20 *Nutr.* 2014;10(1):44-60.  
21  
22 21. Leung BM, McDonald SW, Kaplan BJ, Giesbrecht GF, Tough SC. Comparison of  
23  
24 sample characteristics in two pregnancy cohorts: community-based versus population-based  
25  
26 recruitment methods. *BMC Med Res Methodol.* 2013;13:149.  
27  
28 22. Roberts GBD. Analyses Based on Combining Similar Information from  
29  
30 *Multiple Surveys. Section on Survey Research Methods Joint Statistical Meetings (JSM); 2009.*  
31  
32 p. 2138-47.  
33  
34 23. Cox JL, Holden JM, Sagovsky R. Detection of postnatal depression. Development of the  
35  
36 10-item Edinburgh Postnatal Depression Scale. *Br J Psychiatry.* 1987;150:782-6.  
37  
38 24. Rubertsson C, Borjesson K, Berglund A, Josefsson A, Sydsjo G. The Swedish validation  
39  
40 of Edinburgh Postnatal Depression Scale (EPDS) during pregnancy. *Nord J Psychiatry.*  
41  
42 2011;65(6):414-8.  
43  
44 25. Beck CT, Gable RK. Comparative analysis of the performance of the Postpartum  
45  
46 *Depression Screening Scale with two other depression instruments. Nurs Res.* 2001;50(4):242-  
47  
48 50.  
49  
50  
51  
52  
53  
54  
55  
56  
57  
58  
59  
60

- 1  
2  
3 26. Boyd RC, Le HN, Somberg R. Review of screening instruments for postpartum  
4 depression. *Arch Womens Ment Health*. 2005;8(3):141-53.  
5  
6
- 7 27. Gaynes BN, Gavin N, Meltzer-Brody S, Lohr KN, Swinson T, Gartlehner G, et al.  
8 Perinatal depression: prevalence, screening accuracy, and screening outcomes. *Evid Rep Technol*  
9 *Assess (Summ)*. 2005(119):1-8.  
10  
11
- 12 28. Matthey S, Fisher J, Rowe H. Using the Edinburgh postnatal depression scale to screen  
13 for anxiety disorders: conceptual and methodological considerations. *J Affect Disord*.  
14 2013;146(2):224-30.  
15  
16
- 17 29. Matthey S. Using the Edinburgh Postnatal Depression Scale to screen for anxiety  
18 disorders. *Depress Anxiety*. 2008;25(11):926-31.  
19  
20
- 21 30. Pampalon R, Raymond G. A deprivation index for health and welfare planning in  
22 Quebec. *Chronic Dis Can*. 2000;21(3):104-13.  
23  
24
- 25 31. Alberta Health Services. How to use the Pampalon Deprivation Index in Alberta:  
26 Research and Innovation, Alberta Health Services; 2016.  
27  
28
- 29 32. Canadian Institute for Health Information (CIHI). Reducing gaps in Health: A focus on  
30 socioeconomic status in Urban Canada. Ottawa, Ont.: CIHI; 2008.  
31  
32
- 33 33. StataCorp. Stata manual release 13. Statistical software. A Stata Press Publication  
34 StataCorp LP College Station, Texas, 2013.  
35  
36
- 37 34. Sterne JA, White IR, Carlin JB, Spratt M, Royston P, Kenward MG, et al. Multiple  
38 imputation for missing data in epidemiological and clinical research: potential and pitfalls. *Bmj*.  
39 2009;338:b2393.  
40  
41
- 42 35. Flynn HA, McBride N, Cely A, Wang Y, DeCesare J. Relationship of prenatal depression  
43 and comorbidities to infant outcomes. *CNS Spectr*. 2015;20(1):20-8.  
44  
45  
46  
47  
48  
49  
50  
51  
52  
53  
54  
55  
56  
57  
58  
59  
60

- 1  
2  
3 36. Ibanez G, Charles MA, Forhan A, Magnin G, Thiebaugeorges O, Kaminski M, et al.  
4  
5 Depression and anxiety in women during pregnancy and neonatal outcome: data from the EDEN  
6  
7 mother-child cohort. *Early Hum Dev.* 2012;88(8):643-9.  
8  
9  
10 37. Pollack MH. Comorbid anxiety and depression. *J Clin Psychiatry.* 2005;66 Suppl 8:22-9.  
11  
12 38. Kessler RC. Stress, social status, and psychological distress. *J Health Soc Behav.*  
13  
14 1979;20(3):259-72.  
15  
16 39. Seguin L, Potvin L, St-Denis M, Loiselle J. Chronic stressors, social support, and  
17  
18 depression during pregnancy. *Obstet Gynecol.* 1995;85(4):583-9.  
19  
20  
21 40. McDonald SW, Lyon AW, Benzies KM, McNeil DA, Lye SJ, Dolan SM, et al. The All  
22  
23 Our Babies pregnancy cohort: design, methods, and participant characteristics. *BMC Pregnancy*  
24  
25 *Childbirth.* 2013;13 Suppl 1:S2.  
26  
27  
28 41. Gracie SK, Lyon AW, Kehler HL, Pennell CE, Dolan SM, McNeil DA, et al. All Our  
29  
30 Babies Cohort Study: recruitment of a cohort to predict women at risk of preterm birth through  
31  
32 the examination of gene expression profiles and the environment. *BMC Pregnancy Childbirth.*  
33  
34 2010;10:87.  
35  
36  
37  
38  
39  
40  
41  
42  
43  
44  
45  
46  
47  
48  
49  
50  
51  
52  
53  
54  
55  
56  
57  
58  
59  
60

**Table 1: Distribution of maternal characteristics across anxiety and depression status during pregnancy**

| Maternal characteristics                        | Overall<br>(n=5297) | Absence of both<br>anxiety and<br>depression<br>n=4294 (82.1%) | Presence of anxiety<br>only<br>n=312 (6.0%) | Presence of<br>depression<br>only<br>n=220 (4.2%) | Presence of both<br>anxiety and<br>depression<br>n=402 (7.7%) | $\chi^2$<br>p-value |
|-------------------------------------------------|---------------------|----------------------------------------------------------------|---------------------------------------------|---------------------------------------------------|---------------------------------------------------------------|---------------------|
|                                                 | n (%)               | n (%)                                                          | n (%)                                       | n (%)                                             | n (%)                                                         |                     |
| Maternal age                                    |                     |                                                                |                                             |                                                   |                                                               | 0.006               |
| <35 years                                       | 4117 (79.2)         | 3333 (79.0)                                                    | 261 (84.5)                                  | 156 (72.6)                                        | 315 (81.6)                                                    |                     |
| ≥35 years                                       | 1079 (20.8)         | 886 (21.0)                                                     | 48 (15.5)                                   | 59 (27.4)                                         | 71 (18.4)                                                     |                     |
| Marital status                                  |                     |                                                                |                                             |                                                   |                                                               | <0.0001             |
| Single/divorced/separated                       | 262 (5.1)           | 168 (3.9)                                                      | 22 (7.2)                                    | 25 (11.5)                                         | 47 (11.8)                                                     |                     |
| Married/common-law                              | 4916 (94.9)         | 4080 (96.1)                                                    | 284 (92.8)                                  | 193 (88.5)                                        | 351 (88.2)                                                    |                     |
| Ethnicity                                       |                     |                                                                |                                             |                                                   |                                                               | <0.0001             |
| Non-white                                       | 1087 (21.0)         | 807 (19.0)                                                     | 68 (22.2)                                   | 67 (30.9)                                         | 143 (36.1)                                                    |                     |
| White/Caucasian                                 | 4085 (79.0)         | 3437 (80.9)                                                    | 239 (77.9)                                  | 150 (69.1)                                        | 253 (63.9)                                                    |                     |
| Duration of stay in Canada                      |                     |                                                                |                                             |                                                   |                                                               | <0.0001             |
| Born/5 years+                                   | 473 (9.3)           | 3841 (91.6)                                                    | 275 (89.9)                                  | 185 (87.3)                                        | 329 (84.4)                                                    |                     |
| <5 years                                        | 4636 (90.7)         | 352 (8.4)                                                      | 31 (10.1)                                   | 27 (12.7)                                         | 61 (15.6)                                                     |                     |
| Body mass index                                 |                     |                                                                |                                             |                                                   |                                                               | 0.002               |
| Underweight (<18.5kg/m <sup>2</sup> )           | 214 (4.3)           | 170 (4.2)                                                      | 12 (4.1)                                    | 11 (5.3)                                          | 21 (5.6)                                                      |                     |
| Normal weight (18.5 - 24.99 kg/m <sup>2</sup> ) | 3084 (62.5)         | 2552 (63.2)                                                    | 172 (58.5)                                  | 125 (59.8)                                        | 220 (58.4)                                                    |                     |
| Overweight (25 - 29.99 kg/m <sup>2</sup> )      | 1066 (21.6)         | 882 (21.9)                                                     | 59 (20.1)                                   | 50 (23.9)                                         | 73 (19.4)                                                     |                     |
| Obesity (≥30 kg/m <sup>2</sup> )                | 574 (11.6)          | 432 (10.7)                                                     | 51 (17.4)                                   | 23 (11.0)                                         | 63 (16.7)                                                     |                     |
| Parity                                          |                     |                                                                |                                             |                                                   |                                                               | <0.0001             |
| Primiparous                                     | 2649 (51.3)         | 2135 (50.3)                                                    | 199 (64.6)                                  | 106 (48.8)                                        | 205 (51.9)                                                    |                     |
| Multiparous                                     | 2518 (48.7)         | 2106 (49.7)                                                    | 109 (35.4)                                  | 111 (51.2)                                        | 190 (48.1)                                                    |                     |
| Unintended pregnancy                            | 1011 (19.5)         | 742 (17.4)                                                     | 70 (22.6)                                   | 72 (32.9)                                         | 122 (30.7)                                                    | <0.0001             |
| Smoked before pregnancy                         | 1095 (21.1)         | 822 (19.3)                                                     | 86 (27.9)                                   | 61 (28.0)                                         | 123 (30.9)                                                    | <0.0001             |
| Alcohol consumption before pregnancy            | 4363 (84.1)         | 3603 (84.7)                                                    | 268 (87.0)                                  | 181 (82.7)                                        | 305 (76.6)                                                    | <0.0001             |
| Drug abuse before pregnancy                     | 750 (14.5)          | 561 (13.2)                                                     | 61 (19.9)                                   | 44 (20.4)                                         | 83 (20.8)                                                     | <0.0001             |



| Maternal characteristics                           | Overall<br>(n=5297) | Absence of both<br>anxiety and<br>depression<br>n=4294 (82.1%) | Presence of anxiety<br>only<br>n=312 (6.0%) | Presence of<br>depression<br>only<br>n=220 (4.2%) | Presence of both<br>anxiety and<br>depression<br>n=402 (7.7%) | $\chi^2$<br>p-value |
|----------------------------------------------------|---------------------|----------------------------------------------------------------|---------------------------------------------|---------------------------------------------------|---------------------------------------------------------------|---------------------|
|                                                    | n (%)               | n (%)                                                          | n (%)                                       | n (%)                                             | n (%)                                                         |                     |
| Maternal education                                 |                     |                                                                |                                             |                                                   |                                                               | <0.0001             |
| High school or less than high school               | 613 (11.9)          | 451 (10.6)                                                     | 49 (16.2)                                   | 42 (19.4)                                         | 68 (17.3)                                                     |                     |
| Some post-secondary                                | 859 (16.7)          | 669 (15.8)                                                     | 57 (18.9)                                   | 35 (16.2)                                         | 96 (24.4)                                                     |                     |
| Completed post-secondary                           | 3688 (71.5)         | 3121 (73.6)                                                    | 196 (64.9)                                  | 139 (64.4)                                        | 229 (58.3)                                                    |                     |
| Household income                                   | 477 (9.4)           |                                                                |                                             |                                                   |                                                               | <0.0001             |
| <\$40,000                                          | 723 (14.3)          | 325 (7.8)                                                      | 25 (8.4)                                    | 40 (18.6)                                         | 85 (22.0)                                                     |                     |
| \$40,000 - <\$70,000                               | 1204 (23.8)         | 542 (13.0)                                                     | 53 (17.8)                                   | 43 (20.0)                                         | 83 (21.5)                                                     |                     |
| \$70,000 - <\$100,000                              | 2659 (52.5)         | 989 (23.8)                                                     | 76 (25.5)                                   | 52 (24.2)                                         | 85 (22.0)                                                     |                     |
| ≥\$100,000                                         |                     | 2301(55.4)                                                     | 144 (48.3)                                  | 80 (37.2)                                         | 133 (34.5)                                                    |                     |
| Inadequate social support anytime during pregnancy | 1148 (22.1)         | 731 (17.1)                                                     | 77 (25.0)                                   | 127 (57.4)                                        | 210 (52.4)                                                    | <0.0001             |
| Neighborhood deprivation index                     |                     |                                                                |                                             |                                                   |                                                               | <0.0001             |
| Quintile 1 (least deprived)                        | 1323 (27.1)         | 1108 (27.7)                                                    | 68 (24.3)                                   | 51 (24.9)                                         | 80 (22.4)                                                     |                     |
| Quintile 2                                         | 1259 (25.8)         | 1045 (26.1)                                                    | 82 (29.3)                                   | 41 (20.0)                                         | 83 (23.2)                                                     |                     |
| Quintile 3                                         | 972 (19.9)          | 800 (20.0)                                                     | 64 (22.9)                                   | 39 (19.0)                                         | 65 (18.2)                                                     |                     |
| Quintile 4                                         | 736 (15.1)          | 618 (15.5)                                                     | 37 (13.2)                                   | 30 (14.6)                                         | 47 (13.1)                                                     |                     |
| Quintile 5 (most deprived)                         | 595 (12.2)          | 429 (10.7)                                                     | 29 (10.4)                                   | 44 (21.5)                                         | 83 (23.2)                                                     |                     |
| Preterm birth                                      | 356 (7.3)           | 276 (6.9)                                                      | 19 (6.5)                                    | 16 (8.2)                                          | 37 (10.6)                                                     | 0.068               |

Sample size between variables differs as missing values were deleted using variable wise or pair wise deletion approach

**Table 2: Distribution of maternal characteristics across preterm birth status**

|                                                    | Preterm birth<br>n (%) | Term birth<br>n (%) | $\chi^2$<br>p-value |
|----------------------------------------------------|------------------------|---------------------|---------------------|
| Maternal age                                       |                        |                     | 0.332               |
| <35yrs                                             | 269 (77.1)             | 3541 (79.3)         |                     |
| ≥35yrs                                             | 80 (22.9)              | 926 (20.7)          |                     |
| Marital status                                     |                        |                     | 0.657               |
| Single/divorced/separated                          | 17 (5.0)               | 198 (4.4)           |                     |
| Married/common-law                                 | 326 (95.0)             | 4260 (95.6)         |                     |
| Ethnicity                                          |                        |                     | 0.004               |
| White/Caucasian                                    | 253 (73.8)             | 3574 (80.3)         |                     |
| Others                                             | 90 (26.2)              | 878 (19.7)          |                     |
| Duration of stay in Canada                         |                        |                     | 0.061               |
| <5 years                                           | 39 (11.6)              | 380 (8.6)           |                     |
| Born/5 years+                                      | 296 (88.4)             | 4022 (91.4)         |                     |
| Body mass index                                    |                        |                     | 0.001               |
| Underweight (<18.5kg/m <sup>2</sup> )              | 12 (3.7)               | 180 (4.2)           |                     |
| Normal weight (18.5 - 24.99 kg/m <sup>2</sup> )    | 183 (56.3)             | 2694 (63.3)         |                     |
| Overweight (25 - 29.99 kg/m <sup>2</sup> )         | 72 (22.2)              | 924 (21.7)          |                     |
| Obesity (≥30 kg/m <sup>2</sup> )                   | 58 (17.9)              | 459 (10.8)          |                     |
| Parity                                             |                        |                     | 0.004               |
| Primiparous                                        | 201 (58.9)             | 2266 (50.9)         |                     |
| Multiparous                                        | 140 (41.1)             | 2184 (49.1)         |                     |
| Unintended pregnancy                               | 62 (18.0)              | 829 (18.6)          | 0.798               |
| Smoked before pregnancy                            | 85 (24.7)              | 913 (20.5)          | 0.062               |
| Alcohol consumption before pregnancy               | 295 (85.8)             | 3770 (84.5)         | 0.531               |
| Drug abuse before pregnancy                        | 54 (15.7)              | 643 (14.4)          | 0.519               |
| Maternal education                                 |                        |                     | 0.891               |
| High school or less than high school               | 40 (11.7)              | 487 (11.0)          |                     |
| Some post-secondary                                | 54 (15.8)              | 729 (16.4)          |                     |
| Completed post-secondary                           | 248 (72.5)             | 3227 (72.6)         |                     |
| Household income                                   |                        |                     | 0.436               |
| <\$40,000                                          | 34 (10.2)              | 360 (8.2)           |                     |
| \$40,000 - <\$70,000                               | 51 (15.2)              | 591 (13.5)          |                     |
| \$70,000 - <\$100,000                              | 74 (22.1)              | 1059 (24.2)         |                     |
| ≥\$100,000                                         | 176 (52.5)             | 2358 (54.0)         |                     |
| Inadequate social support anytime during pregnancy | 84 (24.2)              | 955 (21.4)          | 0.216               |
| Neighborhood deprivation index                     |                        |                     | 0.002               |
| Quintile 1 (least deprived)                        | 93 (26.1)              | 1176 (27.7)         |                     |
| Quintile 2                                         | 76 (21.4)              | 1119 (26.3)         |                     |
| Quintile 3                                         | 71 (19.9)              | 839 (19.8)          |                     |
| Quintile 4                                         | 52 (14.6)              | 639 (15.0)          |                     |
| Quintile 5 (most deprived)                         | 64 (18.0)              | 475 (11.2)          |                     |

Sample size between variables differs as missing values were deleted using variable wise or pair wise deletion approach

**Table 3: Association between anxiety and depression status during pregnancy and preterm birth<sup>a</sup>**

| Anxiety and depression status during pregnancy <sup>b</sup>                                                                             | Overall OR (95%CI) | Stratified by neighborhood deprivation indices (quintile) |                       |                       |                                          |
|-----------------------------------------------------------------------------------------------------------------------------------------|--------------------|-----------------------------------------------------------|-----------------------|-----------------------|------------------------------------------|
|                                                                                                                                         |                    | Quintile 1 <sup>c</sup> OR (95%CI)                        | Quintile 2 OR (95%CI) | Quintile 3 OR (95%CI) | Quintile 4 and 5 <sup>d</sup> OR (95%CI) |
| Unadjusted:                                                                                                                             |                    |                                                           |                       |                       |                                          |
| Presence of anxiety only                                                                                                                | 0.9 (0.6, 1.5)     | 0.8 (0.3, 2.2)                                            | 0.8 (0.3, 2.2)        | 1.1 (0.4, 2.9)        | 1.3 (0.5, 2.9)                           |
| Presence of depression only                                                                                                             | 1.2 (0.7, 2.1)     | 0.6 (0.2, 2.1)                                            | 0.8 (0.2, 3.6)        | 1.9 (0.7, 4.2)        | 2.6 (0.9, 6.1)                           |
| Presence of both anxiety and depression                                                                                                 | 1.6 (1.1, 2.3)     | 0.2 (0.1, 1.5)                                            | 1.3 (0.5, 3.1)        | 2.8 (1.3, 5.5)        | 2.5 (1.3, 3.7)                           |
| Adjusted for parity, ethnicity, body mass index, maternal age, smoking, social support, maternal education, and household total income: |                    |                                                           |                       |                       |                                          |
| Presence of anxiety only                                                                                                                | 0.8 (0.6, 1.6)     | 0.7 (0.2, 1.9)                                            | 0.7 (0.2, 2.1)        | 1.0 (0.4, 2.9)        | 1.0 (0.4, 2.6)                           |
| Presence of depression only                                                                                                             | 1.3 (0.8, 2.5)     | 0.7 (0.2, 2.5)                                            | 0.9 (0.2, 4.1)        | 1.7 (0.8, 4.7)        | 2.1 (0.9, 7.0)                           |
| Presence of both anxiety and depression                                                                                                 | 1.6 (1.1, 2.3)     | 0.2 (0.1, 1.5)                                            | 1.4 (0.6, 3.3)        | 2.1 (1.2, 5.8)        | 2.2 (1.3, 4.0)                           |

<sup>a</sup>Estimates were from analyses based on multiple imputation; <sup>b</sup>Absence of both anxiety and depression as a reference group; <sup>c</sup>quintile 1: least deprived neighborhood; <sup>d</sup>quintile 5: most deprived neighborhood (quintile 4 and 5 were combined due to few or no cases in some strata); OR: odds ratio; CI: confidence interval

**Table 4: Predicted marginal prevalence of preterm birth<sup>a</sup>**

| Anxiety and depression status during pregnancy <sup>b</sup> | Overall % (95%CI) | Stratified by neighborhood deprivation indices (quintile) |                      |                      |                                         |
|-------------------------------------------------------------|-------------------|-----------------------------------------------------------|----------------------|----------------------|-----------------------------------------|
|                                                             |                   | Quintile 1 <sup>b</sup> % (95%CI)                         | Quintile 2 % (95%CI) | Quintile 3 % (95%CI) | Quintile 4 and 5 <sup>c</sup> % (95%CI) |
| Absence of both anxiety and depression                      | 7.1 (6.8, 13.1)   | 7.6 (5.6, 9.3)                                            | 6.4 (4.8, 7.9)       | 6.9 (5.1, 8.8)       | 7.6 (5.9, 9.3)                          |
| Presence of anxiety only                                    | 6.3 (3.3, 9.1)    | 5.4 (0.2, 10.7)                                           | 4.9 (0.3, 9.5)       | 6.5 (0.3, 12.7)      | 7.9 (1.3, 14.9)                         |
| Presence of depression only                                 | 9.6 (5.2, 14.1)   | 4.7 (0.5, 10.4)                                           | 5.7 (0.45, 13.4)     | 13.3 (3.0, 23.2)     | 14.1 (2.7, 25.3)                        |
| Presence of both anxiety and depression                     | 10.0 (6.8, 13.1)  | 1.4 (0.1, 4.2)                                            | 8.0 (1.9, 14.1)      | 15.9 (6.3, 25.6)     | 15.7 (9.5, 23.2)                        |

<sup>a</sup>Adjusted for parity, ethnicity, and body mass index, maternal age, smoking, social support, maternal education, and household total income; <sup>b</sup>quintile 1: least deprived neighborhood; <sup>c</sup>quintile 5: most deprived neighborhood (quintile 4 and 5 were combined due to few or no cases in some strata); OR: odds ratio; CI: confidence interval

Figure 1: A directed acyclic graph depicting the hypothesized causal structure connecting anxiety and depression to preterm birth\*

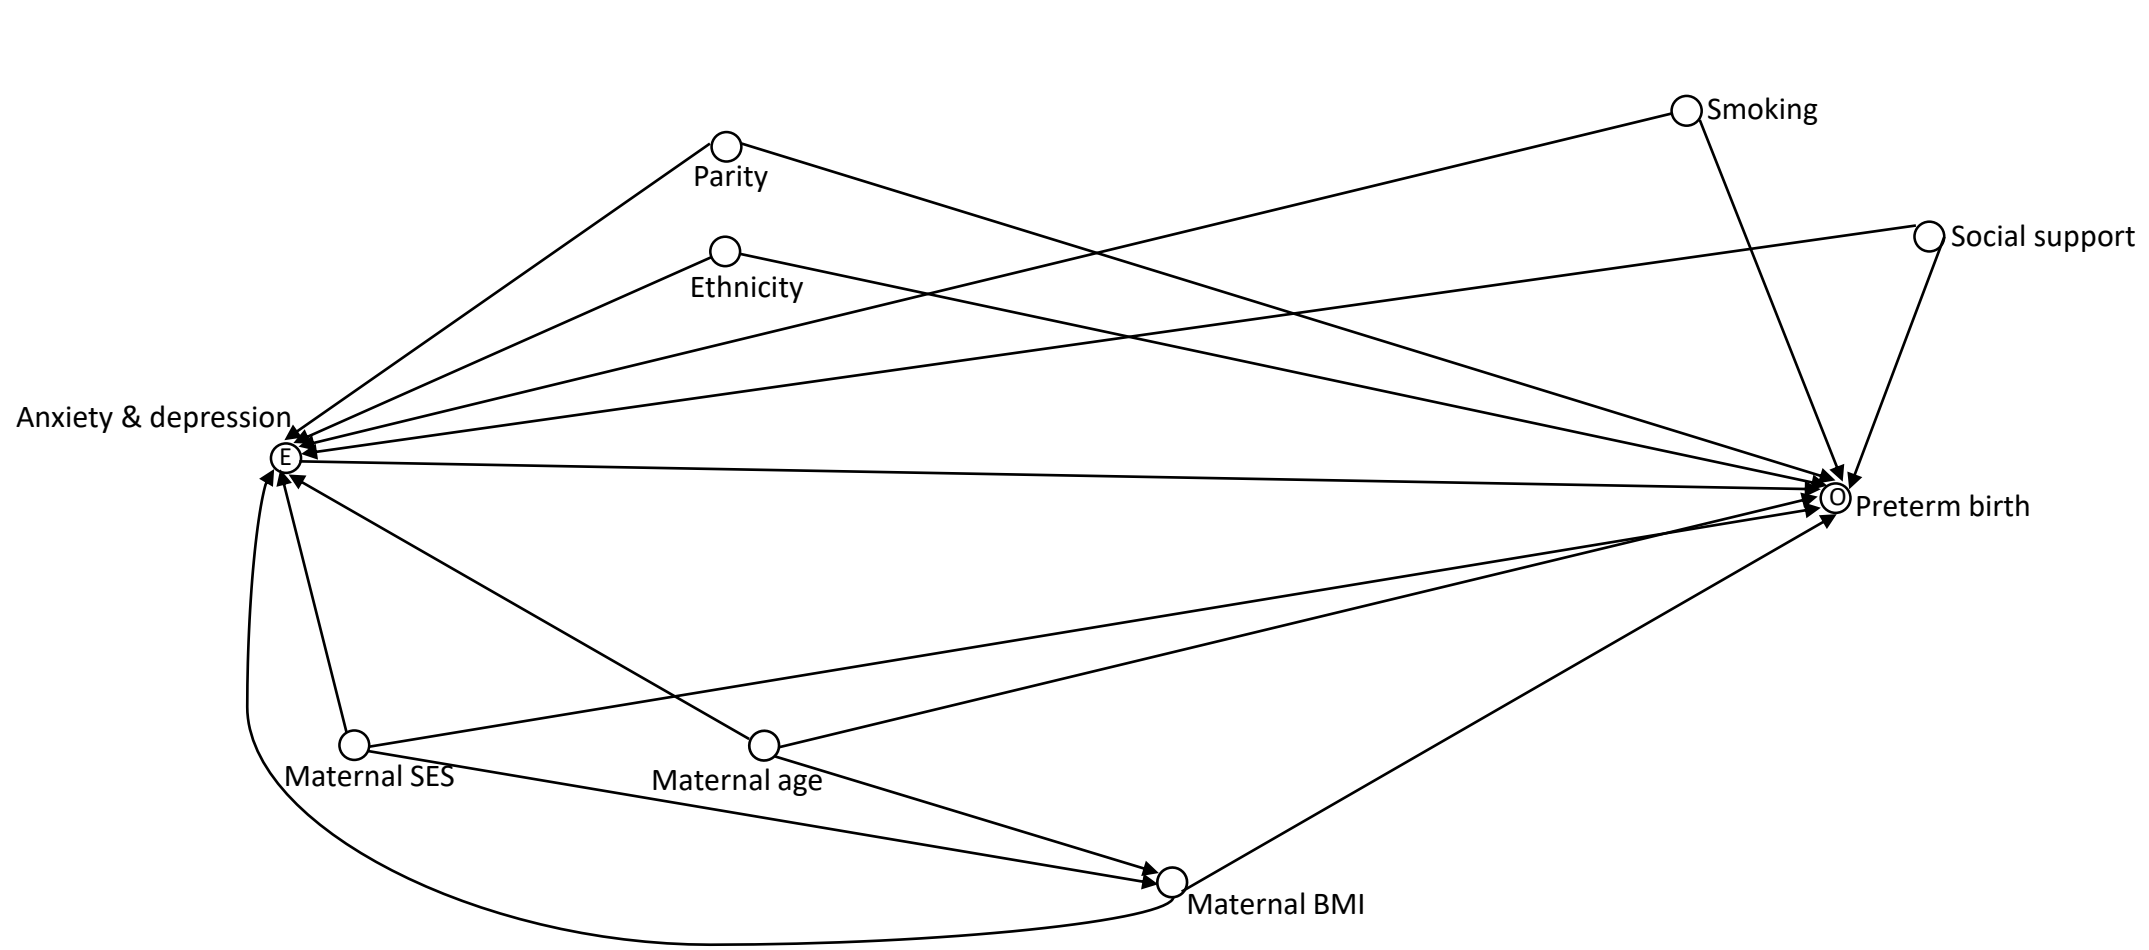

\*The same causal structure is hypothesized to apply both to low and high SES neighborhoods. Maternal age and SES are considered causes of maternal BMI, which is therefore a collider variable in the causal model. However, simultaneous adjustment for age and maternal SES block the biasing paths opened by adjustment for maternal BMI

ⓔ: exposure; Ⓞ: outcome; ○: adjusted; SES: socioeconomic status; BMI: body mass index

1  
2  
3  
4  
5  
6  
7  
8  
9  
10  
11  
12  
13  
14  
15  
16  
17  
18  
19  
20  
21  
22  
23  
24  
25  
26  
27  
28  
29  
30  
31  
32  
33  
34  
35  
36  
37  
38  
39  
40  
41

**STROBE 2007 (v4) Statement—Checklist of items that should be included in reports of cohort studies**

| Section/Topic                | Item # | Recommendation                                                                                                                                                                       | Reported on page # |
|------------------------------|--------|--------------------------------------------------------------------------------------------------------------------------------------------------------------------------------------|--------------------|
| <b>Title and abstract</b>    | 1      | (a) Indicate the study’s design with a commonly used term in the title or the abstract                                                                                               | 1                  |
|                              |        | (b) Provide in the abstract an informative and balanced summary of what was done and what was found                                                                                  | 3, 4, and 5        |
| <b>Introduction</b>          |        |                                                                                                                                                                                      |                    |
| Background/rationale         | 2      | Explain the scientific background and rationale for the investigation being reported                                                                                                 | 6 and 7            |
| Objectives                   | 3      | State specific objectives, including any prespecified hypotheses                                                                                                                     | 7                  |
| <b>Methods</b>               |        |                                                                                                                                                                                      |                    |
| Study design                 | 4      | Present key elements of study design early in the paper                                                                                                                              | 7 and 8            |
| Setting                      | 5      | Describe the setting, locations, and relevant dates, including periods of recruitment, exposure, follow-up, and data collection                                                      | 7 and 8            |
| Participants                 | 6      | (a) Give the eligibility criteria, and the sources and methods of selection of participants. Describe methods of follow-up                                                           | 7                  |
|                              |        | (b) For matched studies, give matching criteria and number of exposed and unexposed                                                                                                  | Not applicable     |
| Variables                    | 7      | Clearly define all outcomes, exposures, predictors, potential confounders, and effect modifiers. Give diagnostic criteria, if applicable                                             | 8, 9, 10           |
| Data sources/<br>measurement | 8*     | For each variable of interest, give sources of data and details of methods of assessment (measurement). Describe comparability of assessment methods if there is more than one group | 8, 9, 10           |
| Bias                         | 9      | Describe any efforts to address potential sources of bias                                                                                                                            | 8, 9, 10           |
| Study size                   | 10     | Explain how the study size was arrived at                                                                                                                                            | Not applicable     |
| Quantitative variables       | 11     | Explain how quantitative variables were handled in the analyses. If applicable, describe which groupings were chosen and why                                                         | 9, 10              |
| Statistical methods          | 12     | (a) Describe all statistical methods, including those used to control for confounding                                                                                                | 9, 10              |
|                              |        | (b) Describe any methods used to examine subgroups and interactions                                                                                                                  | 9, 10              |
|                              |        | (c) Explain how missing data were addressed                                                                                                                                          | 11                 |
|                              |        | (d) If applicable, explain how loss to follow-up was addressed                                                                                                                       | Not applicable     |
|                              |        | (e) Describe any sensitivity analyses                                                                                                                                                | 12                 |

|                          |     |                                                                                                                                                                                                              |                                                |
|--------------------------|-----|--------------------------------------------------------------------------------------------------------------------------------------------------------------------------------------------------------------|------------------------------------------------|
| <b>Results</b>           |     |                                                                                                                                                                                                              |                                                |
| Participants             | 13* | (a) Report numbers of individuals at each stage of study—eg numbers potentially eligible, examined for eligibility, confirmed eligible, included in the study, completing follow-up, and analysed            | N/A                                            |
|                          |     | (b) Give reasons for non-participation at each stage                                                                                                                                                         | N/A                                            |
|                          |     | (c) Consider use of a flow diagram                                                                                                                                                                           | Not provided now: can be provided if requested |
| Descriptive data         | 14* | (a) Give characteristics of study participants (eg demographic, clinical, social) and information on exposures and potential confounders                                                                     | 10, 11, 12, Table 1                            |
|                          |     | (b) Indicate number of participants with missing data for each variable of interest                                                                                                                          | 10                                             |
|                          |     | (c) Summarise follow-up time (eg, average and total amount)                                                                                                                                                  | N/A                                            |
| Outcome data             | 15* | Report numbers of outcome events or summary measures over time                                                                                                                                               | 10, Table 2                                    |
| Main results             | 16  | (a) Give unadjusted estimates and, if applicable, confounder-adjusted estimates and their precision (eg, 95% confidence interval). Make clear which confounders were adjusted for and why they were included | 11, Table 2 and 3                              |
|                          |     | (b) Report category boundaries when continuous variables were categorized                                                                                                                                    | Not applicable                                 |
|                          |     | (c) If relevant, consider translating estimates of relative risk into absolute risk for a meaningful time period                                                                                             | Not done                                       |
| Other analyses           | 17  | Report other analyses done—eg analyses of subgroups and interactions, and sensitivity analyses                                                                                                               | 11 and Table 2                                 |
| <b>Discussion</b>        |     |                                                                                                                                                                                                              |                                                |
| Key results              | 18  | Summarise key results with reference to study objectives                                                                                                                                                     | 12                                             |
| <b>Limitations</b>       |     |                                                                                                                                                                                                              |                                                |
| Interpretation           | 20  | Give a cautious overall interpretation of results considering objectives, limitations, multiplicity of analyses, results from similar studies, and other relevant evidence                                   | 12, 13, 14, 15                                 |
| Generalisability         | 21  | Discuss the generalisability (external validity) of the study results                                                                                                                                        | 15                                             |
| <b>Other information</b> |     |                                                                                                                                                                                                              |                                                |
| Funding                  | 22  | Give the source of funding and the role of the funders for the present study and, if applicable, for the original study on which the present article is based                                                | 17, 18                                         |

\*Give information separately for cases and controls in case-control studies and, if applicable, for exposed and unexposed groups in cohort and cross-sectional studies.

1  
2  
3  
4  
5  
6  
7  
8  
9  
10  
11  
12  
13  
14  
15  
16  
17  
18  
19  
20  
21  
22  
23  
24  
25  
26  
27  
28  
29  
30  
31  
32  
33  
34  
35  
36  
37  
38  
39  
40  
41  
42  
43  
44  
45  
46

**Note:** An Explanation and Elaboration article discusses each checklist item and gives methodological background and published examples of transparent reporting. The STROBE checklist is best used in conjunction with this article (freely available on the Web sites of PLoS Medicine at <http://www.plosmedicine.org/>, Annals of Internal Medicine at <http://www.annals.org/>, and Epidemiology at <http://www.epidem.com/>). Information on the STROBE Initiative is available at [www.strobe-statement.org](http://www.strobe-statement.org).

For peer review only
