# Supplementary material for: Neighbourhood socioeconomic status modifies the association between anxiety and depression during pregnancy and preterm birth: a Community-based Canadian cohort study
Source: PubMed Central journal article supplement — BMJ Open. 2020 Feb 10;10(2):e031035. doi: 10.1136/bmjopen-2019-031035 (PMC7045250; doi:10.1136/bmjopen-2019-031035), 2020-02-10
Supplement: bmjopen-2019-031035supp001.pdf [file bmjopen-2019-031035supp001.pdf]

Figure 1: A directed acyclic graph depicting the hypothesized causal structure connecting anxiety and depression to preterm birth\*

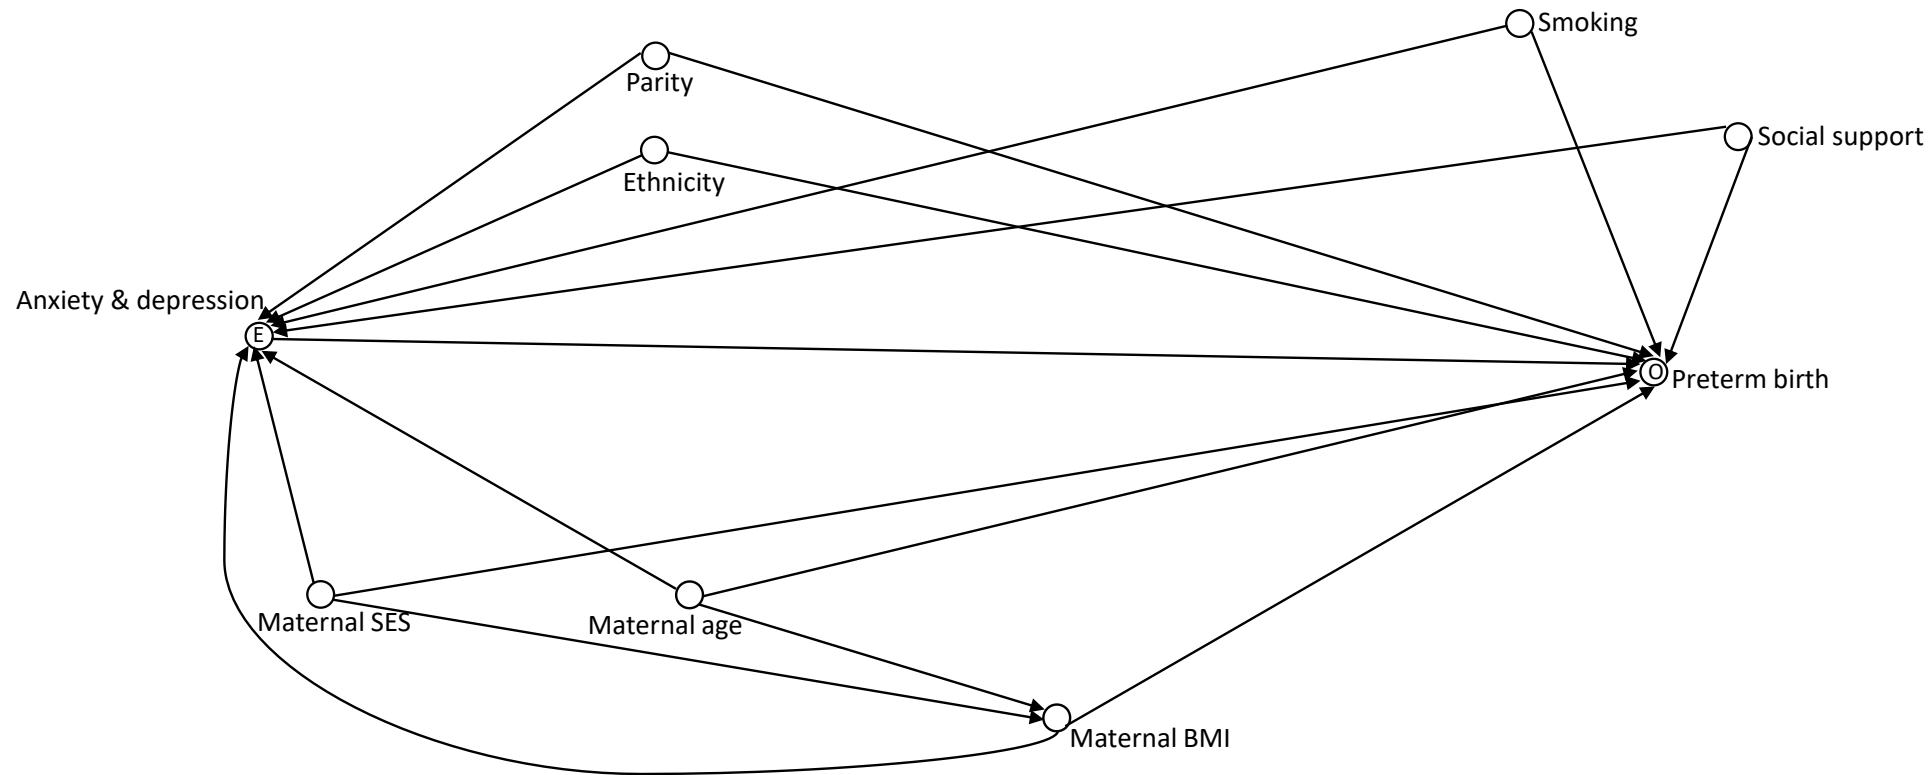

\*The same causal structure is hypothesized to apply both to low and high SES neighborhoods. Maternal age and SES are considered causes of maternal BMI, which is therefore a collider variable in the causal model. However, simultaneous adjustment for age and maternal SES block the biasing paths opened by adjustment for maternal BMI

Ⓔ: exposure; Ⓒ: outcome; ○: adjusted; SES: socioeconomic status; BMI: body mass index
